# Supplementary material for: Self-assembling α,γ-cyclic peptides that generate cavities with tunable properties
Source: Royal Society of Chemistry journal article supplement (doi:10.1039/c5sc03187g), 2015-09-14
Supplement: c5sc03187g1.pdf [file c5sc03187g1.pdf]

# Self-assembling $\alpha,\gamma$ -cyclic peptides that generate cavities with tunable properties.

Nuria Rodríguez-Vázquez, Rebeca García-Fandiño, Manuel Amorín,\* Juan R. Granja\*

Singular Research Center in Chemical Biology and Molecular Materials, (CIQUS), Organic Chemistry Department, University of Santiago de Compostela (USC), 15782 Santiago de Compostela, Spain.

[juanr.granja@usc.es](mailto:juanr.granja@usc.es) and [manuel.amorin@usc.es](mailto:manuel.amorin@usc.es)

**SUPPORTING INFORMATION**

## Index:

|                                                                                                                                                  |    |
|--------------------------------------------------------------------------------------------------------------------------------------------------|----|
| <b>Scheme 1SI</b> (Synthesis of <b>CP1</b> and <b>CP2</b> ).                                                                                     | 3  |
| <b>Scheme 2SI</b> (Synthesis of the <i>N</i> -methylated Ahf).                                                                                   | 4  |
| <b>Scheme 3SI</b> (Synthesis of <b>CP3</b> , <b>CP4</b> and <b>CP5</b> ).                                                                        | 5  |
| <b>Figure 1SI</b> ( <sup>1</sup> H NMR spectrum of <b>CP2</b> ).                                                                                 | 6  |
| <b>Figure 2SI</b> ( <sup>1</sup> H NMR spectrum and selected parts of NOESY spectrum of <b>CP3</b> ).                                            | 7  |
| <b>Figure 3SI</b> (Selected parts of NOESY spectrum of <b>CP3</b> ).                                                                             | 8  |
| <b>Figure 4SI</b> (Temperature and methanol addition experiments of <b>CP4</b> ).                                                                | 9  |
| <b>Figure 5SI</b> ( <sup>1</sup> H NMR spectra of <b>CP4</b> at 253 K, in CDCl <sub>3</sub> and in 5% CD <sub>3</sub> OH in CDCl <sub>3</sub> ). | 10 |
| <b>Figure 6SI</b> ( <sup>1</sup> H NMR studies of the formation of dimer <i>s</i> -D5E $\Rightarrow$ Ag).                                        | 11 |
| <b>Figure 7SI</b> ( <sup>1</sup> H NMR studies of the formation of the dimer <i>s</i> -D5E $\Rightarrow$ (CO <sub>2</sub> H) <sub>2</sub> ).     | 12 |
| <b>Figure 8SI</b> (DFT Optimized structures of bis(methyl picolinate) silver(I) complexes).                                                      | 13 |
| <b>Figure 9SI</b> (DFT Optimized structures of the dimers).                                                                                      | 14 |
| <b>Materials and Methods</b>                                                                                                                     | 15 |
| <b>NMR and FTIR Spectra</b>                                                                                                                      | 27 |
| <b>Computational methods</b>                                                                                                                     | 54 |

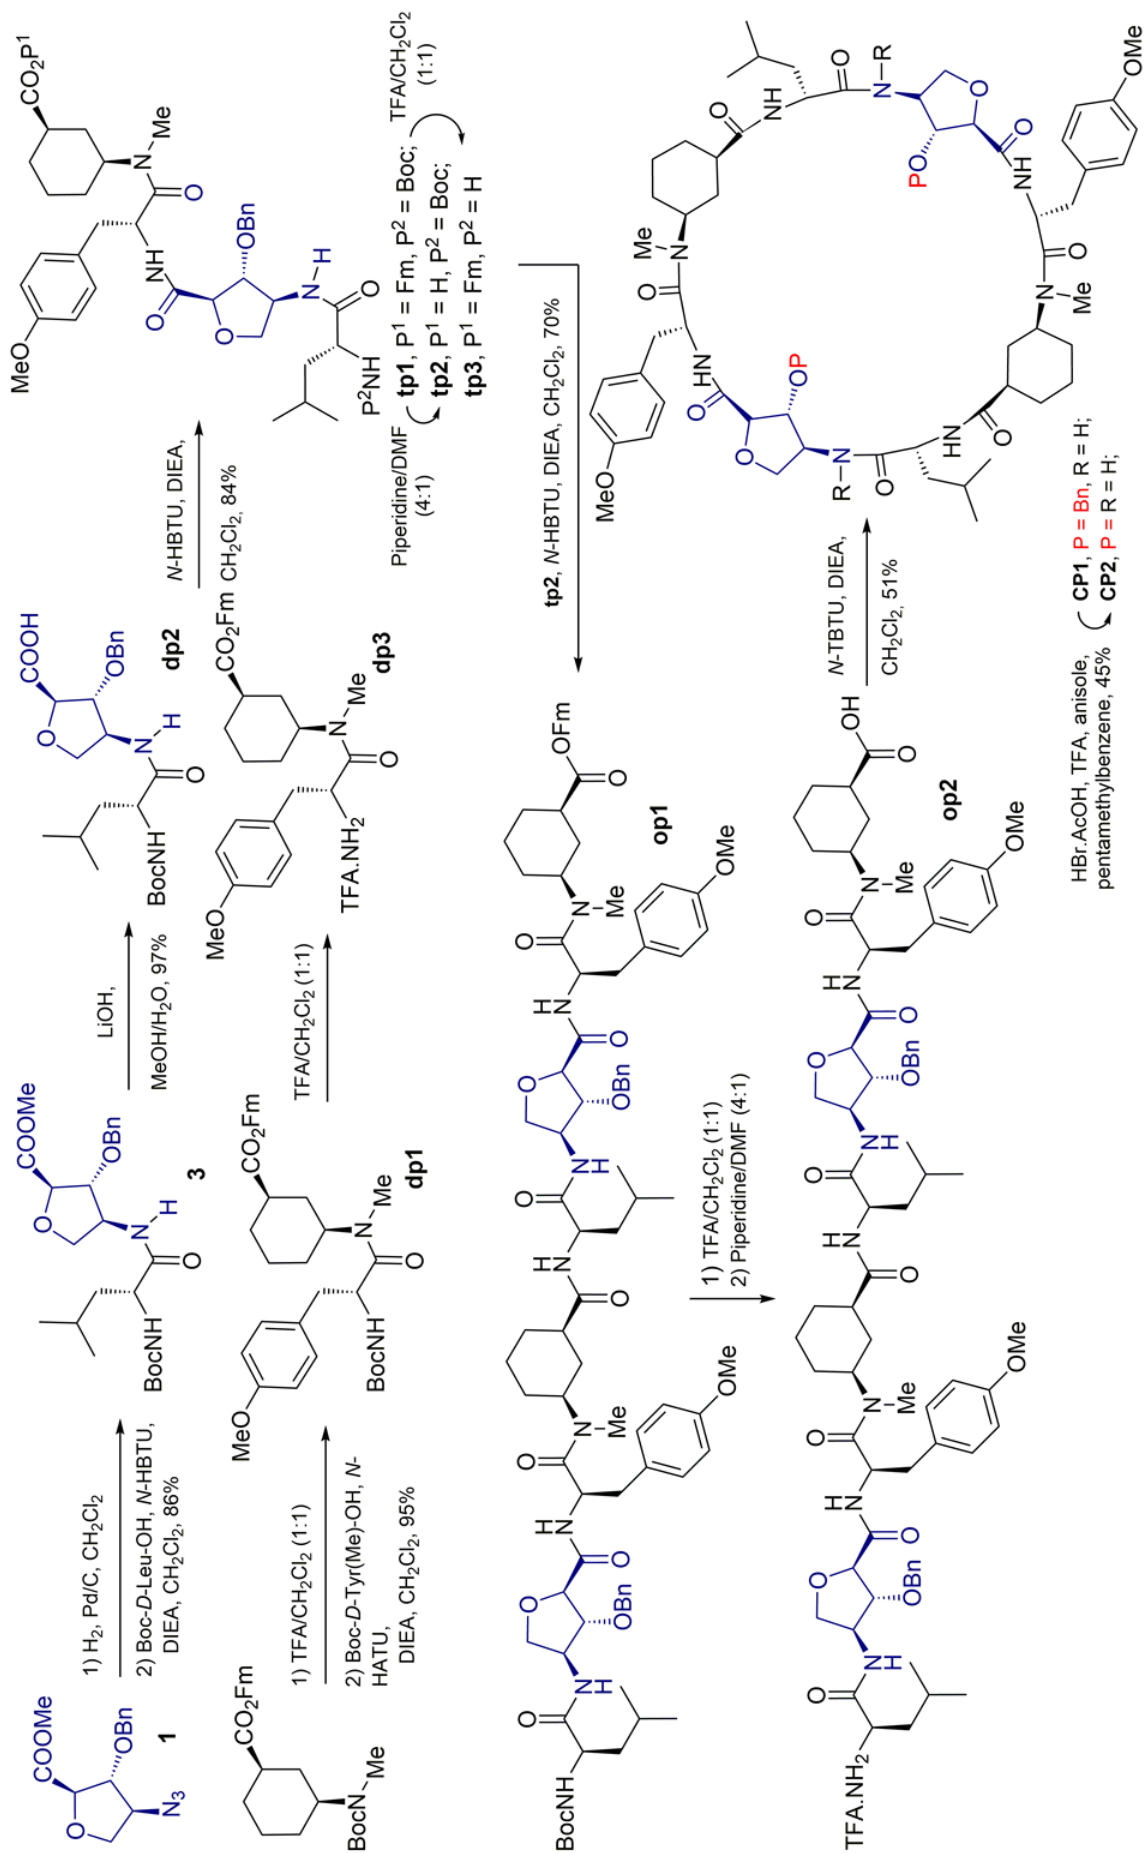

**Scheme 1SI:** Synthetic strategy for the preparation of cyclic peptides **CP1** and **CP2** by solution phase method.

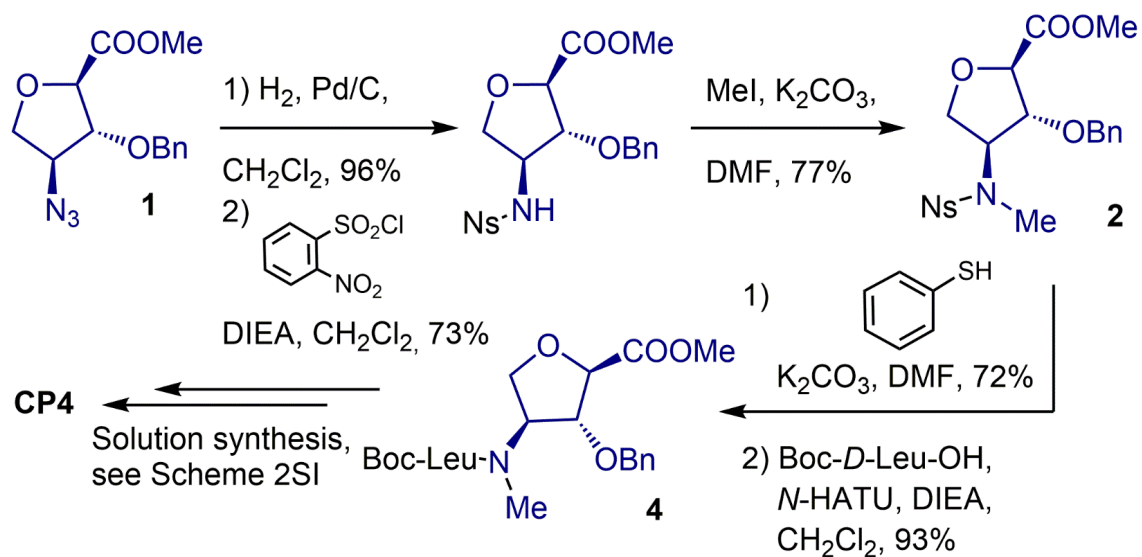

**Scheme 2SI:** Synthesis of the *N*-methylated Ahf using Fukuyama's method for the preparation of the fully protected amino acid **2**. Removal of Nosyl group and coupling with Boc-*D*-Leu-OH provide the dipeptide **4**, the basic component used in the synthesis of **CP4**.



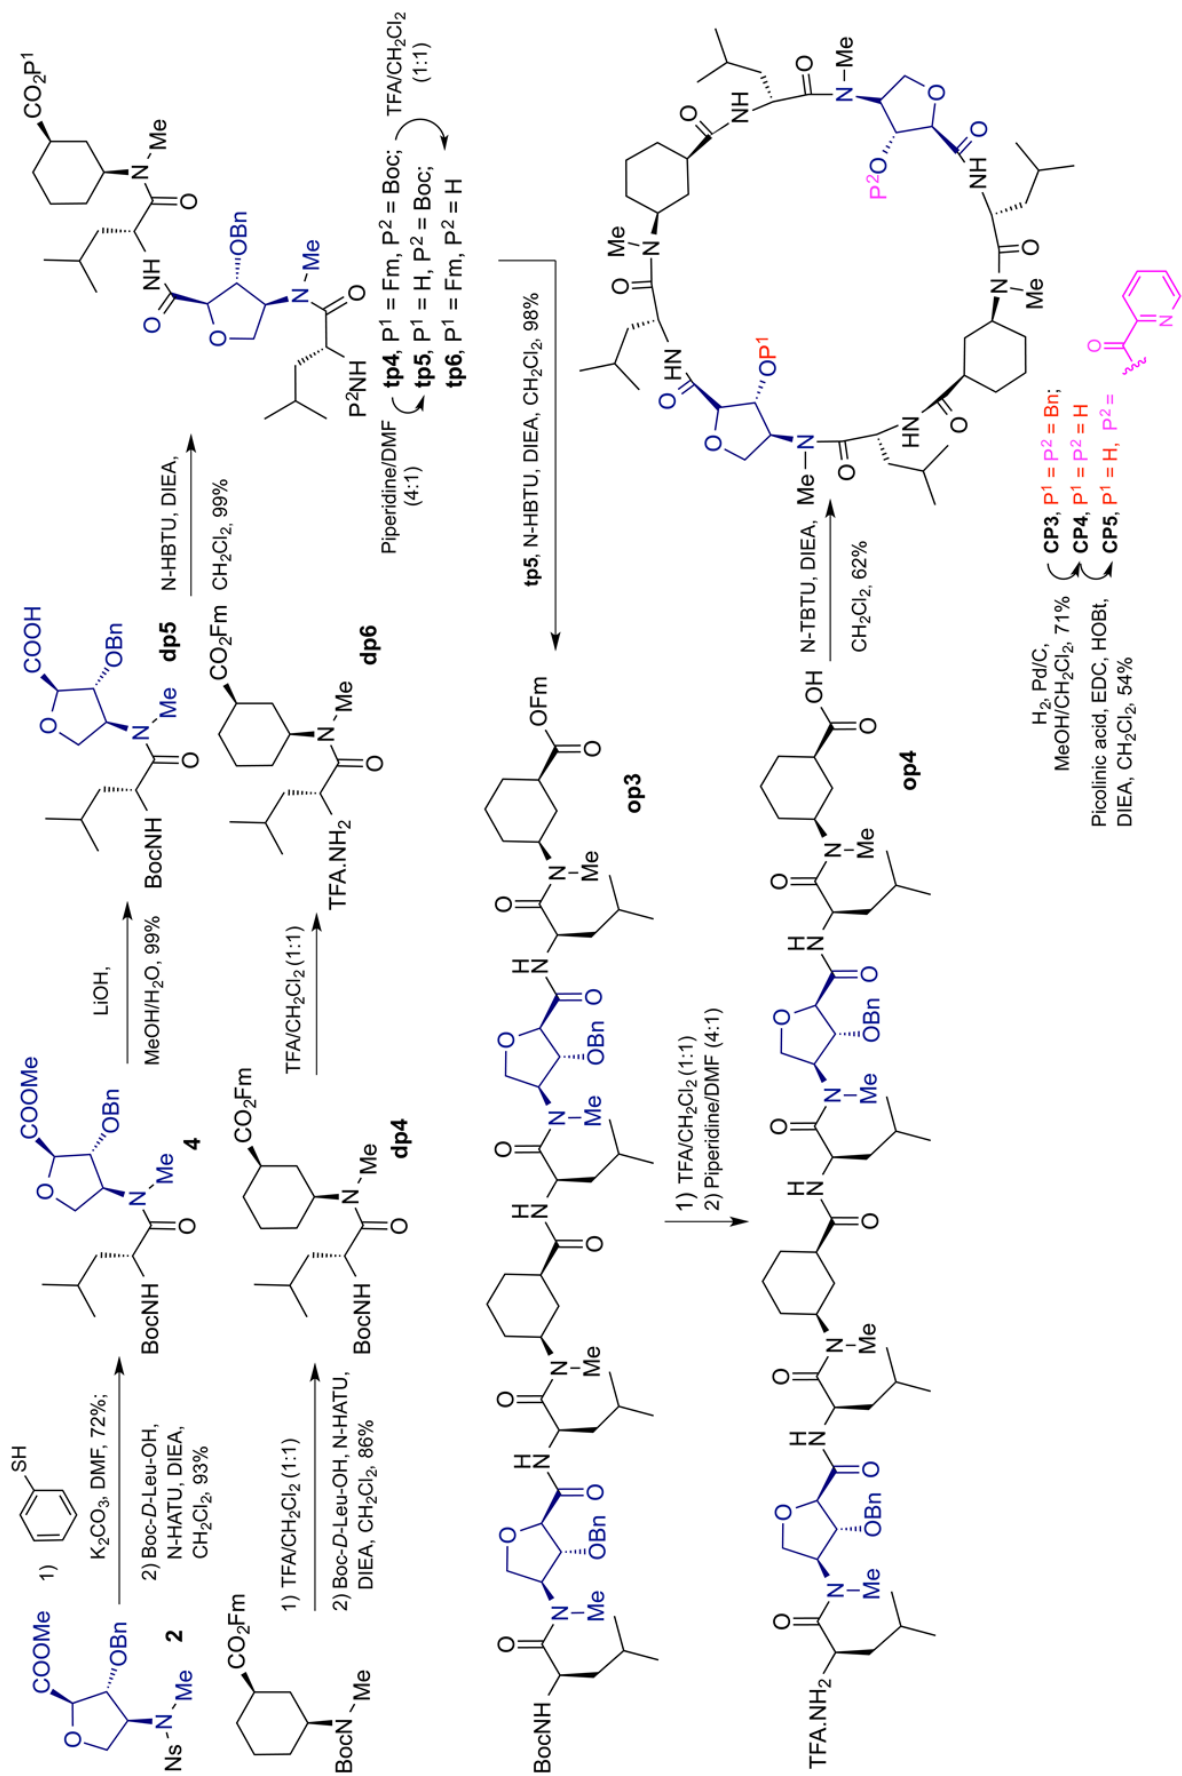

**Scheme 3S1:** Synthetic strategy for the preparation of cyclic peptides **CP3**, **CP4** and **CP5** by solution phase method.

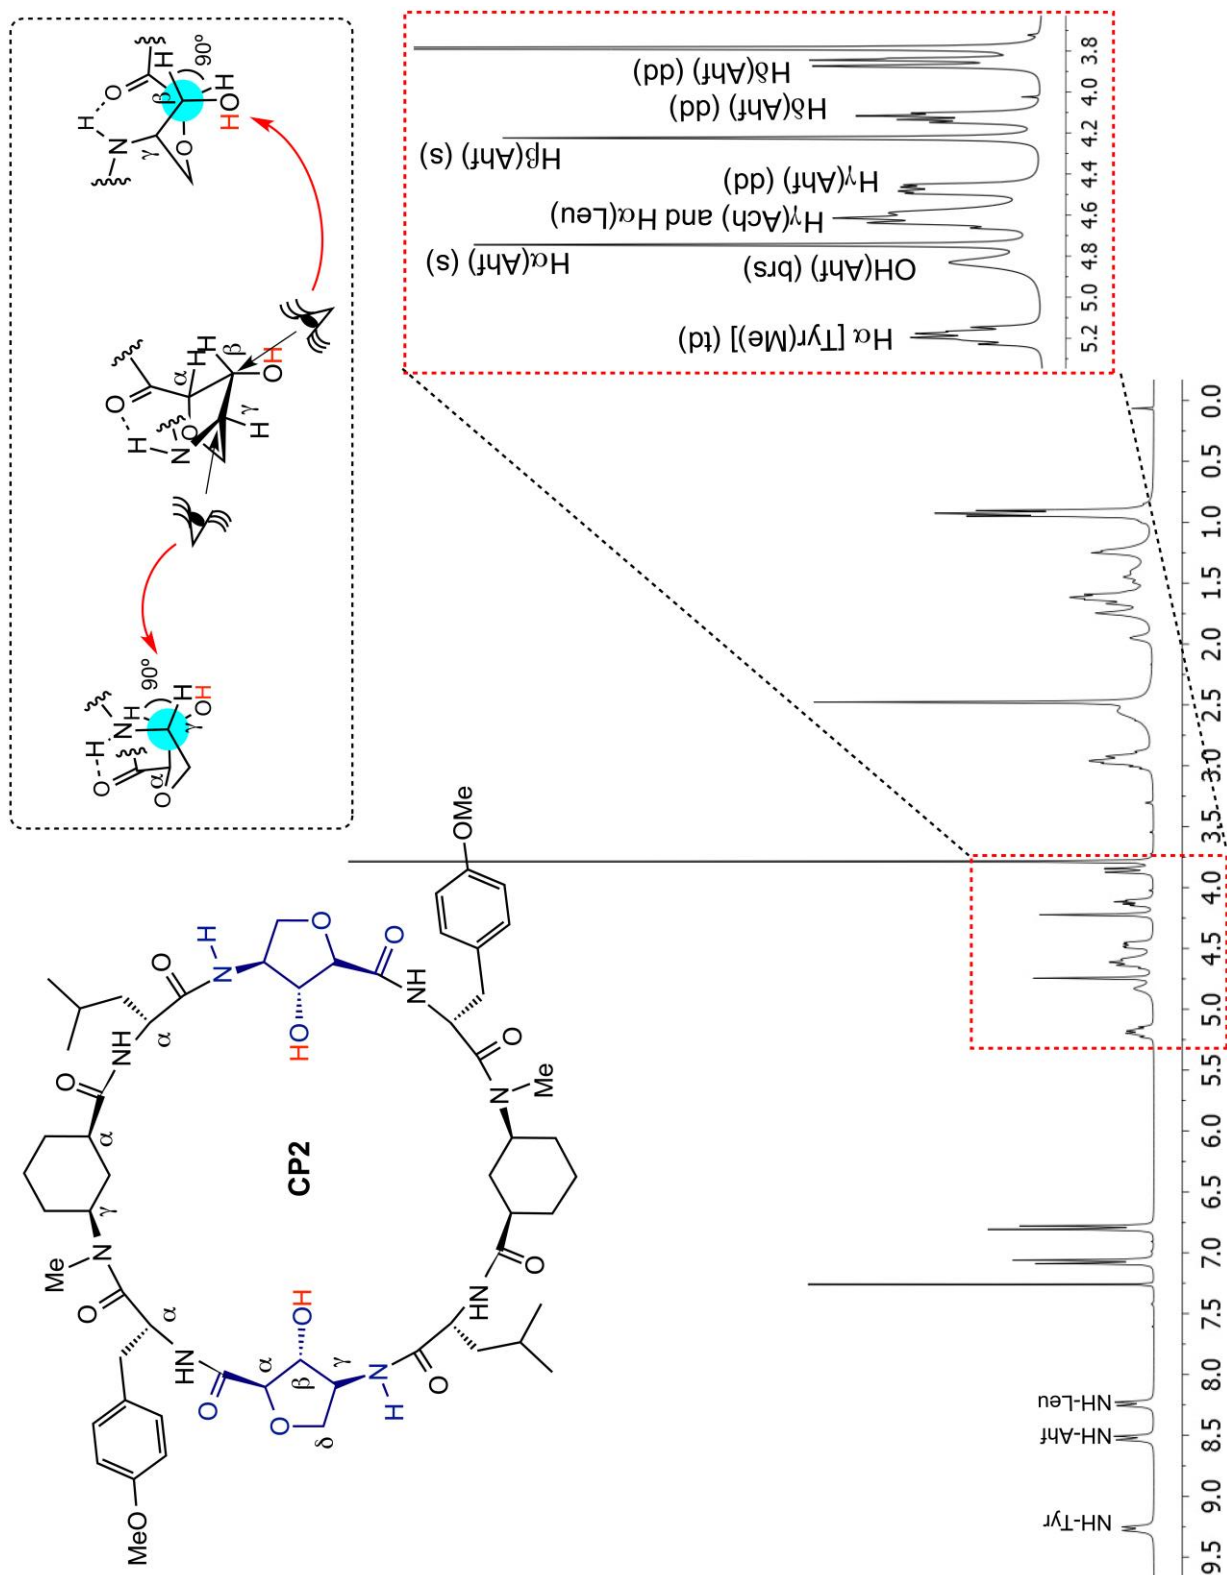

**Figure 1SI:** Top: Structure of **CP2** and model of the tetrahydrofuran conformations, in which the amide proton is hydrogen bonded to its own carbonyl group, showing the perpendicular orientation between the H $\alpha$  and the H $\beta$  and between the H $\gamma$  and the H $\beta$ . Bottom:  $^1\text{H}$  NMR spectrum of **CP2** (20 mM,  $\text{CDCl}_3$ , 298 K); in the inset, an extension of the spectral region between 5.4 and 3.6 ppm should be shown, where the vicinal protons  $\alpha$ -Ahf and  $\beta$ -Ahf appear as singlets, which suggests their perpendicular orientation.

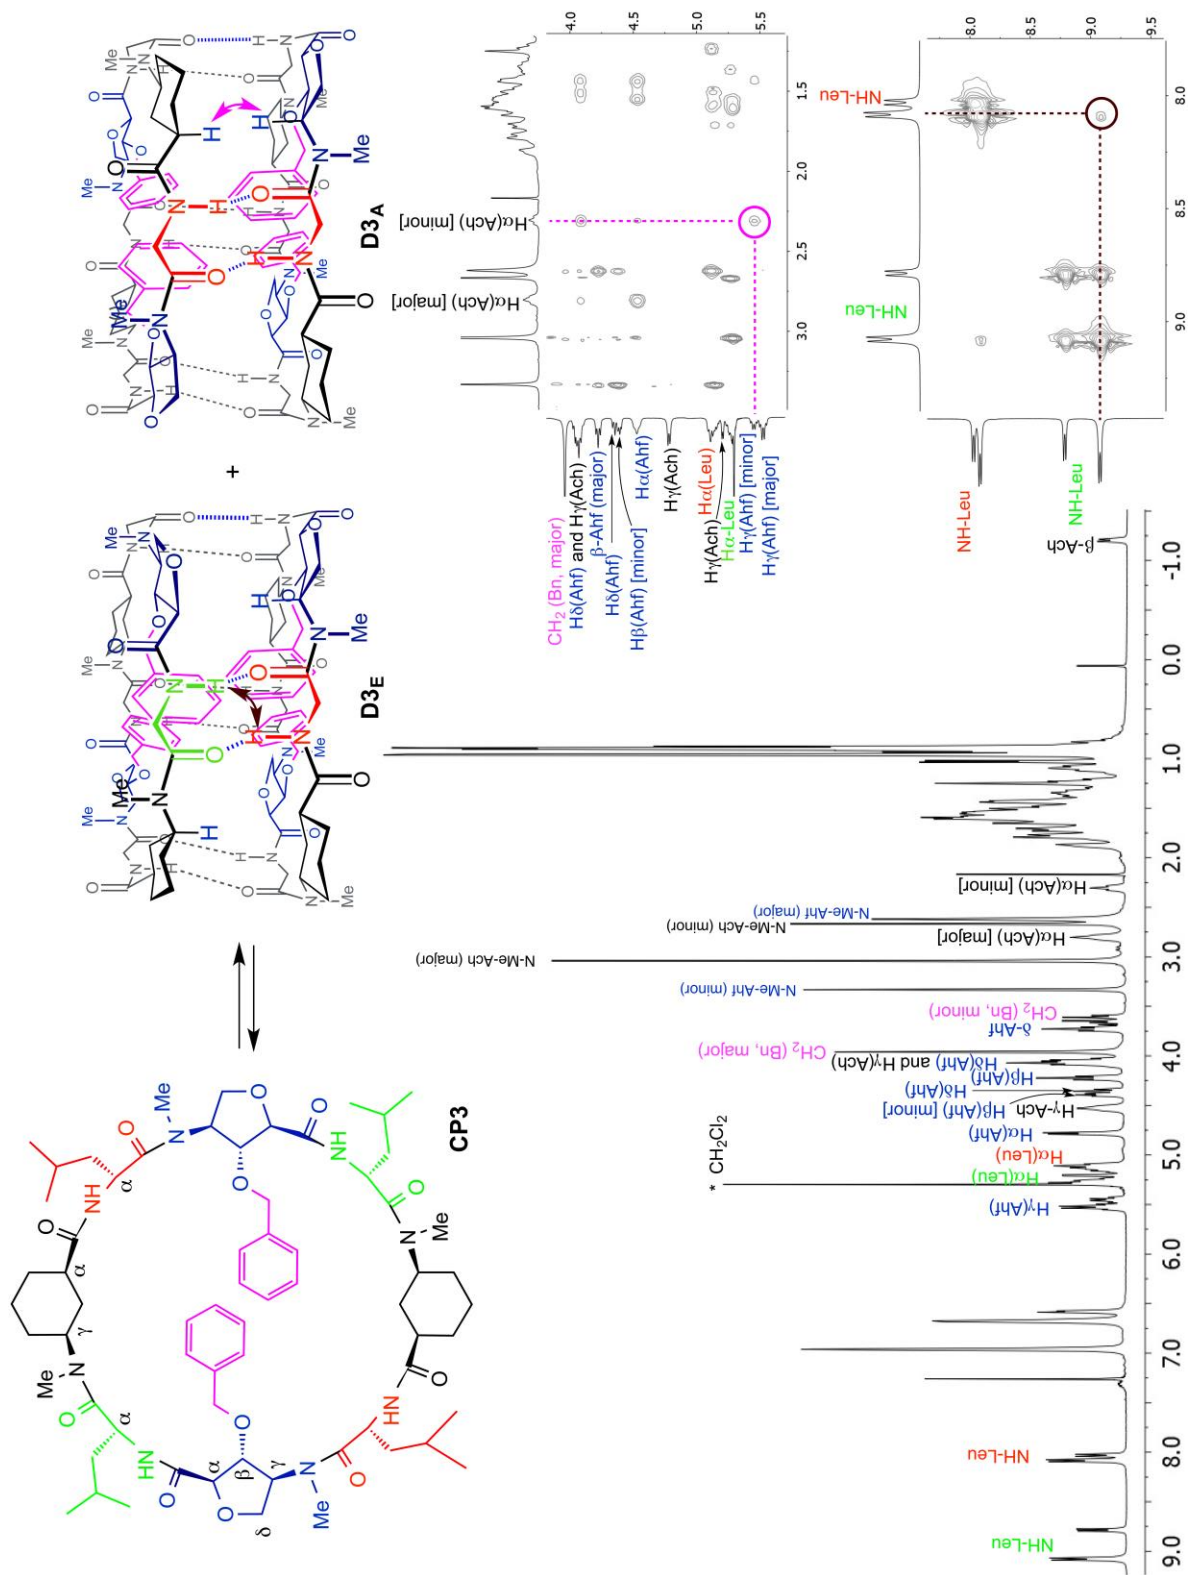

**Figure 2SI:** Top: Structure of **CP3** and model of the two possible dimers: eclipsed (**D3<sub>E</sub>**) and alternated (**D3<sub>A</sub>**). Bottom left: <sup>1</sup>H NMR spectrum of **CP3** (16 mM, CDCl<sub>3</sub>, 298 K), showing the formation of the two non-equivalent dimers in a 2:1 ratio (**D3<sub>E</sub>**:**D3<sub>A</sub>**). Bottom right: Selected parts of NOESY spectrum showing the nOe cross peaks between the α-Ach proton and the γ-Ahf (pink) in the minor form (**D3<sub>A</sub>**) and between the amide protons (N-H) of the two non-equivalent leucines (brown) of the major ensemble (**D3<sub>E</sub>**).

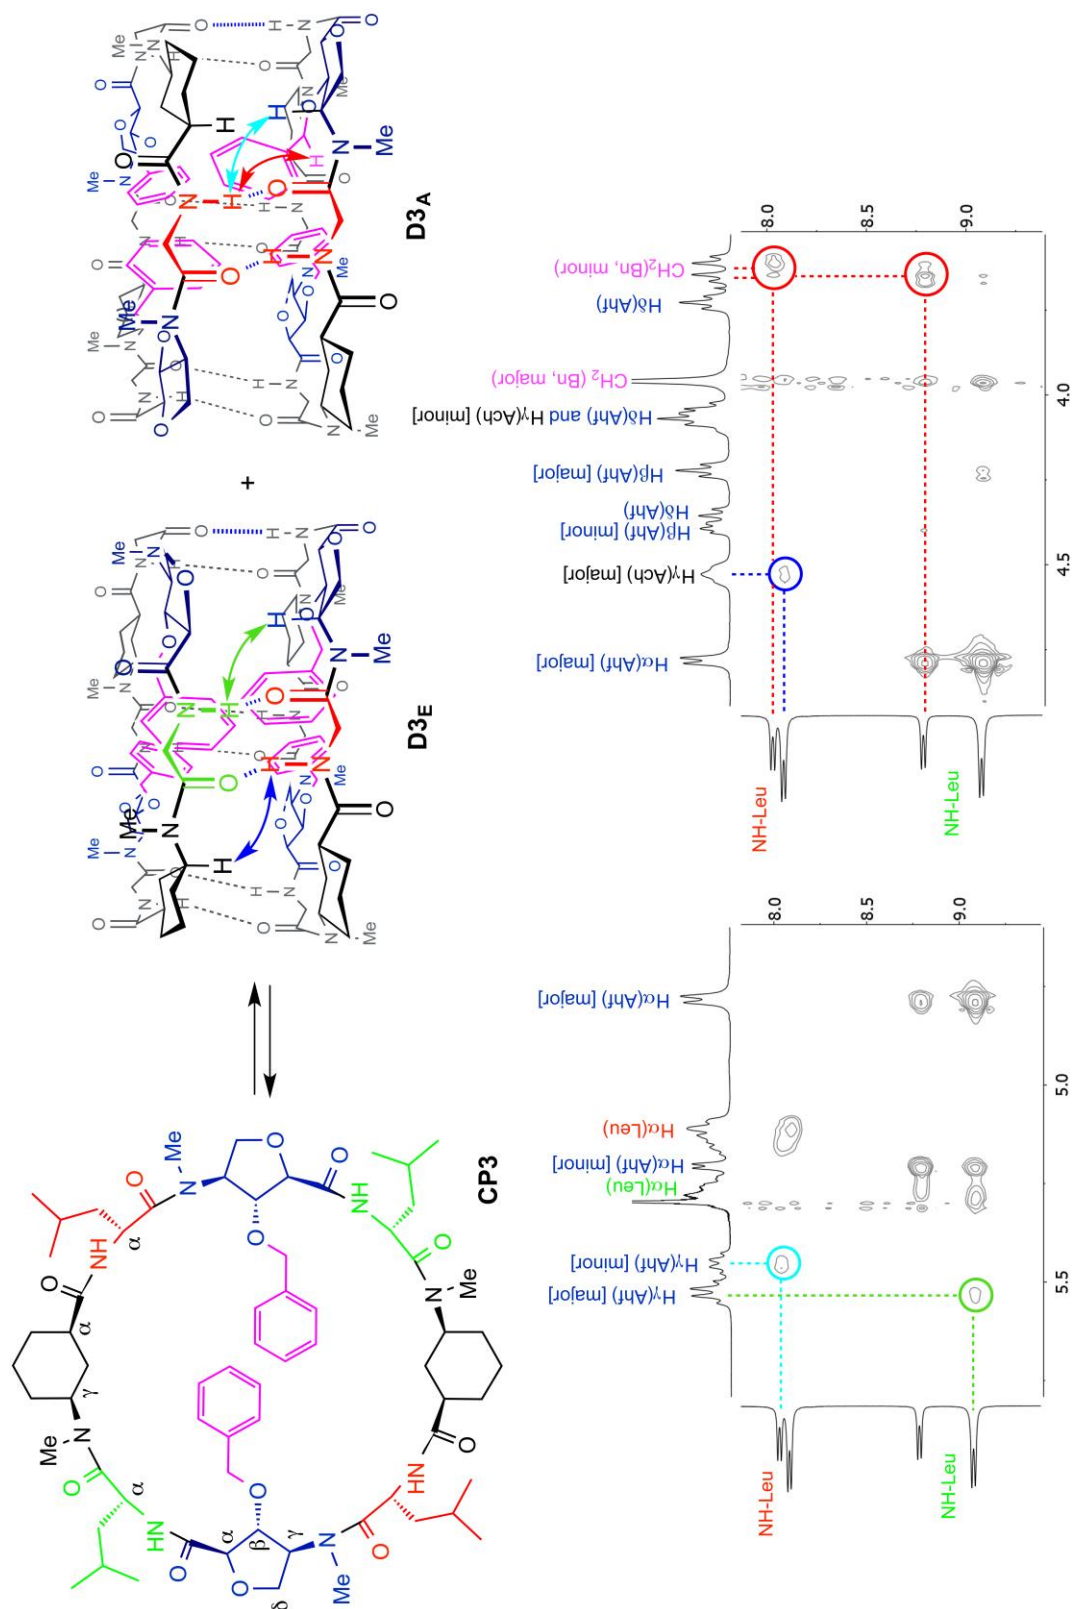

**Figure 3SI:** Top: Structure of **CP3** and model of the two possible dimers: eclipsed (**D3<sub>E</sub>**) and alternated (**D3<sub>A</sub>**). Bottom left: Selected part of NOESY spectrum showing the nOe cross peaks between the  $\gamma$ -Ahf and the Leu N-H (light blue) in the minor form (**D3<sub>A</sub>**), and the between the  $\gamma$ -Ahf and Leu N-H (green) in the major ensemble (**D3<sub>E</sub>**). Bottom right: Selected part of NOESY spectrum showing the nOe cross peaks (red) between the amide protons and the benzylic protons in the minor form (**D3<sub>A</sub>**), and between the  $\gamma$ -Ach and Leu N-H (dark blue) of the major ensemble (**D3<sub>E</sub>**).

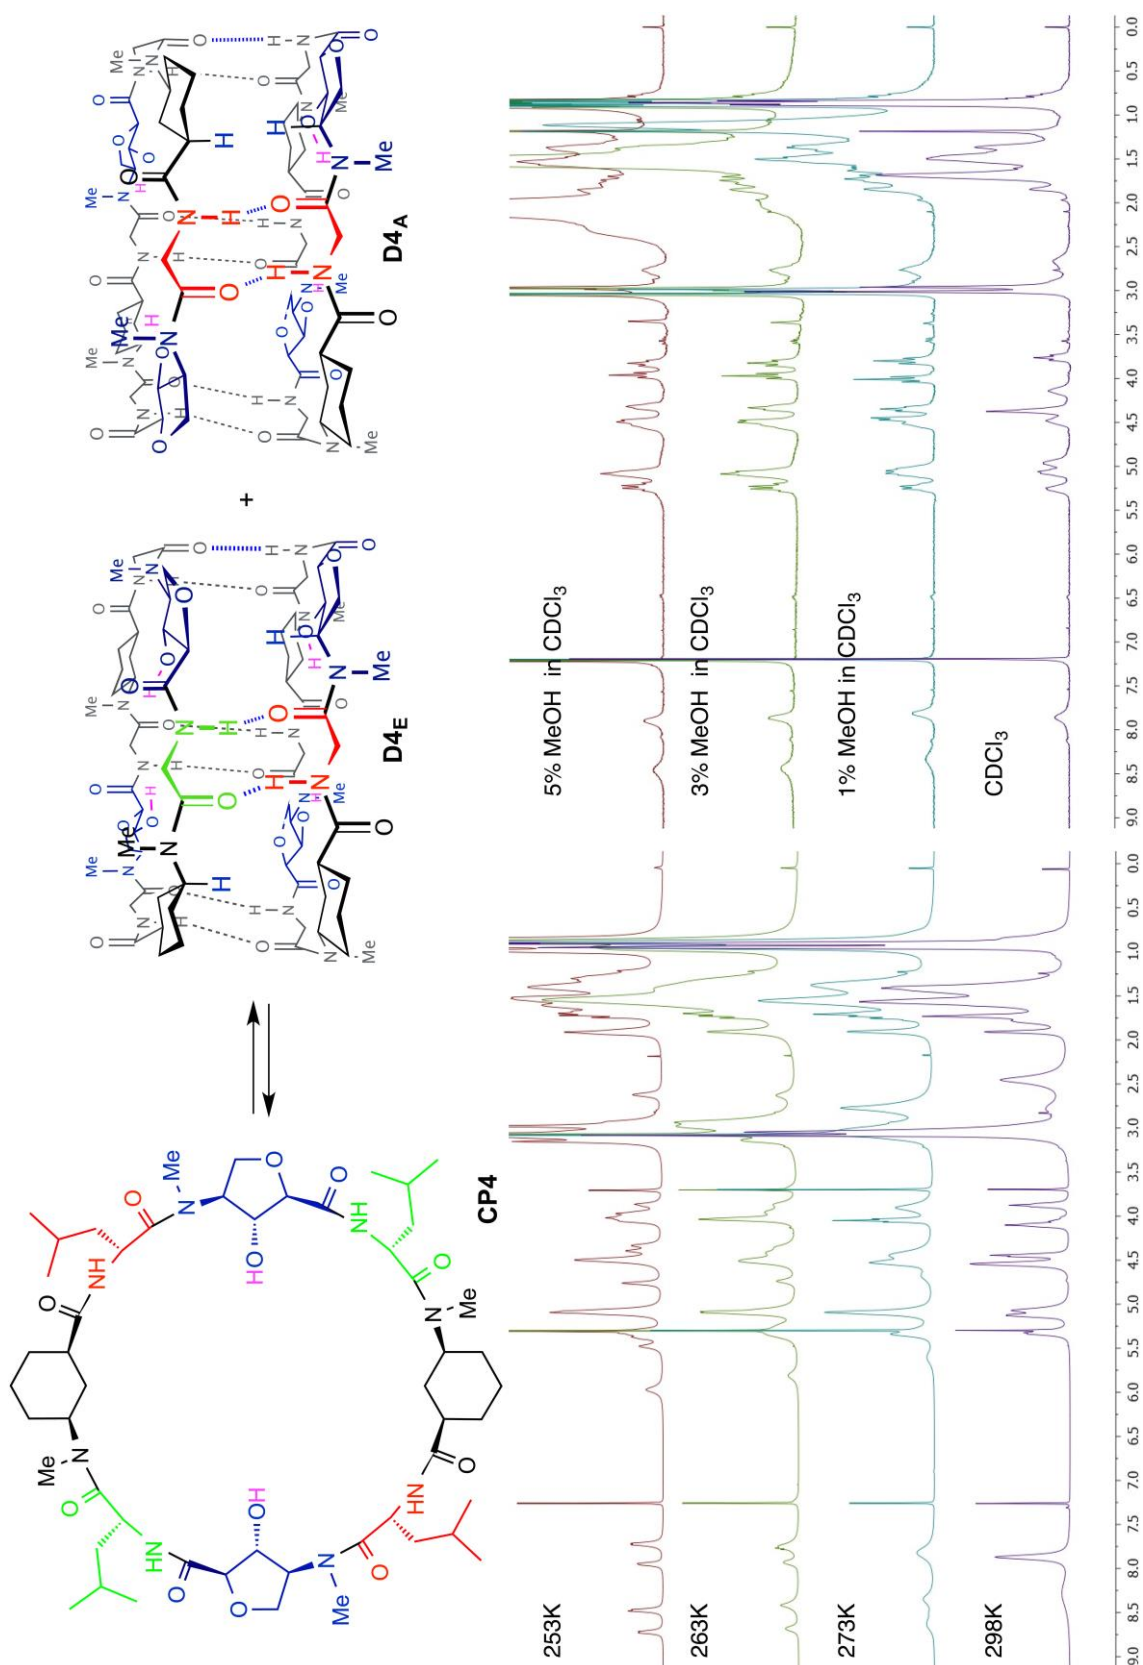

**Figure 4SI:** Top: Structure of **CP4** and model of the two possible dimers: eclipsed (**D4<sub>E</sub>**) and alternated (**D4<sub>A</sub>**). Bottom left: <sup>1</sup>H NMR spectra of **CP4** (5 mM, CDCl<sub>3</sub>) at different temperatures. Bottom right: <sup>1</sup>H NMR experiment of methanol additions (1-5%) to a 5 mM solution of **CP4** in CDCl<sub>3</sub>.



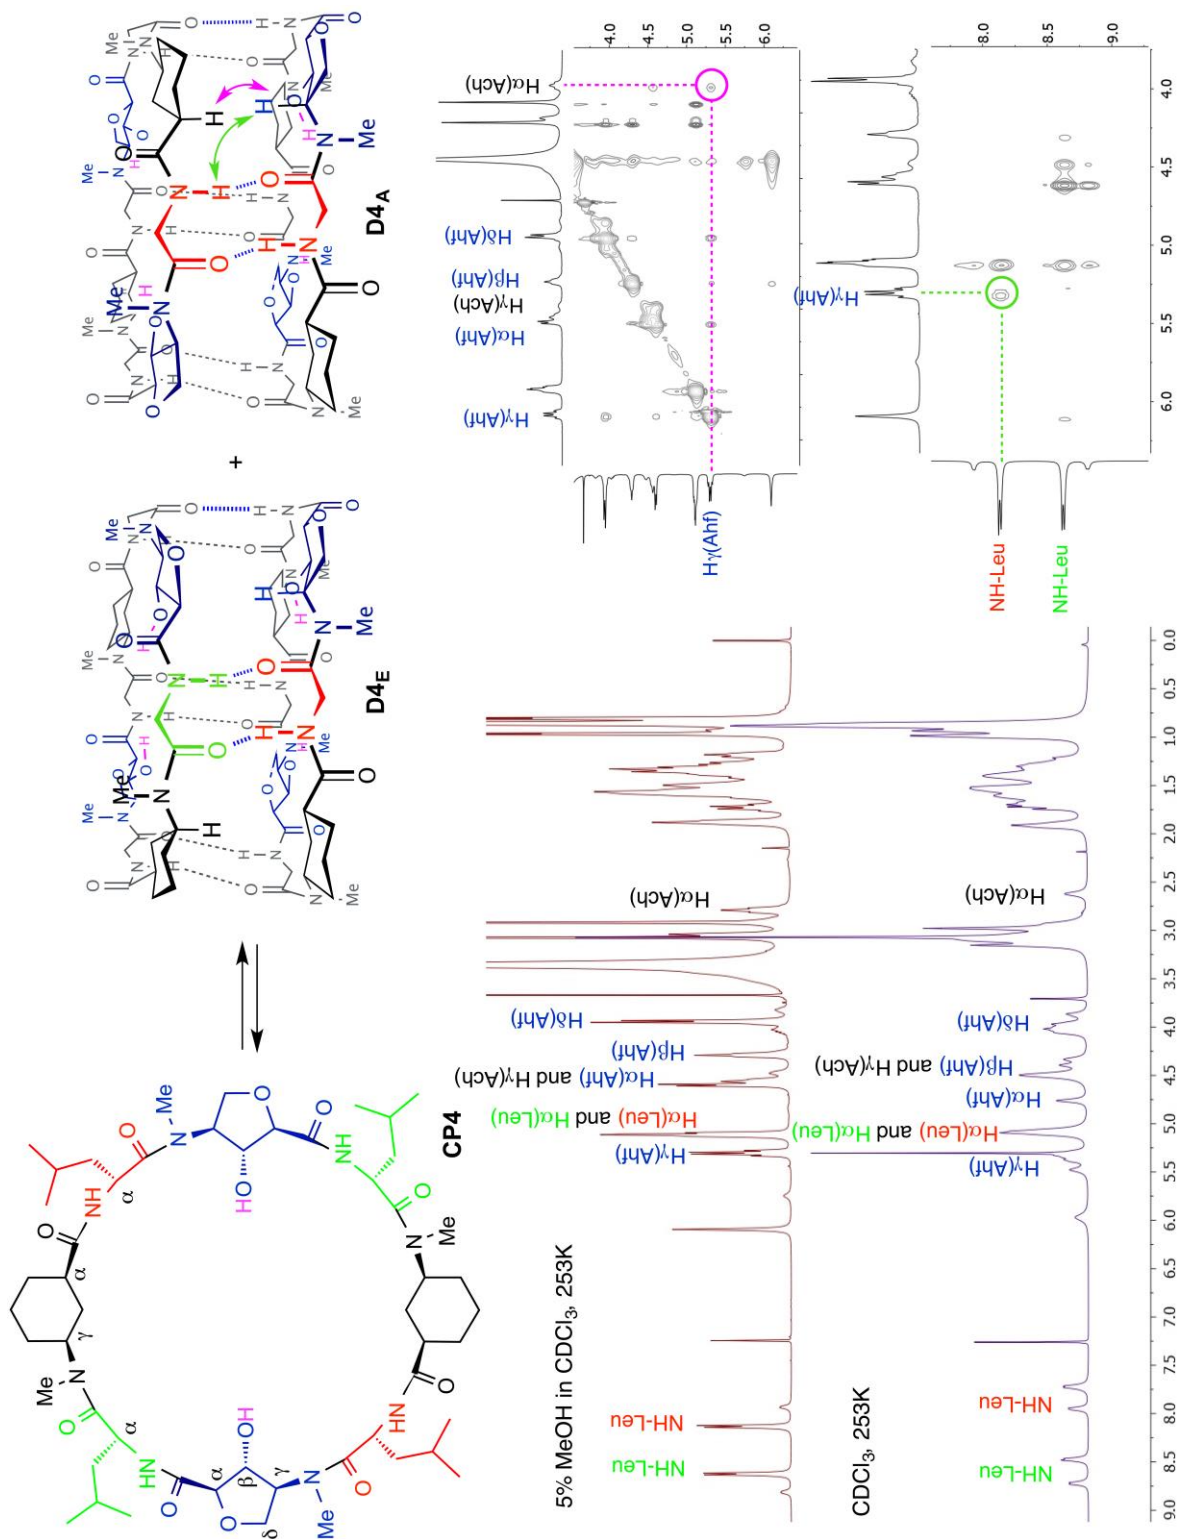

**Figure 5SI:** Top: Structure of **CP4** and model of the two possible dimers: eclipsed (**D4<sub>E</sub>**) and alternated (**D4<sub>A</sub>**). Bottom left: <sup>1</sup>H NMR spectra of **CP4** (32 mM in CDCl<sub>3</sub>) at 253 K, in CDCl<sub>3</sub> and in 5% CD<sub>3</sub>OH in CDCl<sub>3</sub>, showing that at this temperature the addition of methanol induces the formation of mainly one dimer (**D4<sub>A</sub>**). Bottom right: Selected part of NOESY spectrum showing the nOe cross peaks between the α-Ach proton and the γ-Ahf (pink) and between the N-H and the γ-Ahf (green) in the alternated form (**D4<sub>A</sub>**).

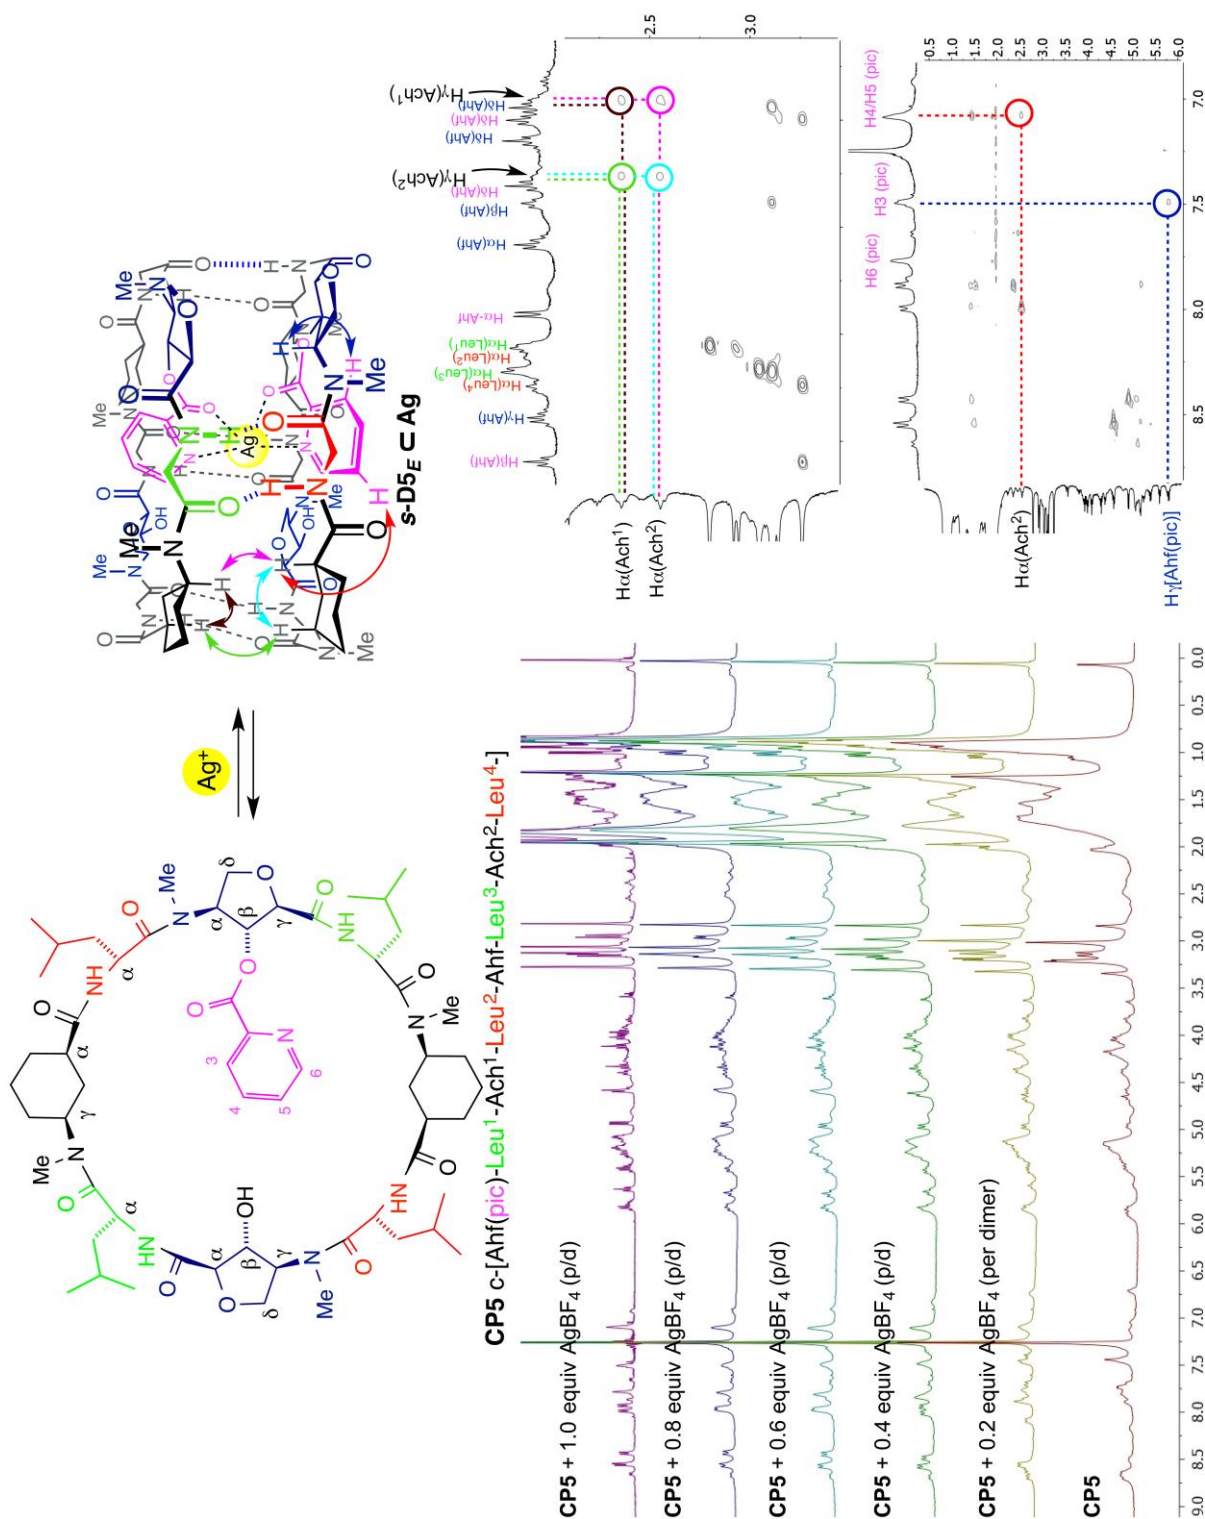

**Figure 6SI:** Top: Structure of CP5 and model of the silver-encapsulated dimer ( $s-D5_E \supset Ag$ ). Bottom left: <sup>1</sup>H NMR studies of the formation of dimer  $s-D5_E \supset Ag$  by the addition of different equivalents of AgBF<sub>4</sub> (0.2-1.0 equiv per dimer) to a CDCl<sub>3</sub> solution of CP5 (5 mM, CDCl<sub>3</sub>, 298 K). Bottom right: Selected parts of NOESY spectrum showing the nOe cross peaks between the H $\gamma$  of each Ach and both H $\alpha$  of Ach that support the formation of the *syn*-eclipsed form ( $s-D5_E \supset Ag$ ). The nOe cross peaks of picolinic moiety protons are also shown, which suggest the incorporation of the silver complex in the dimer cavity.

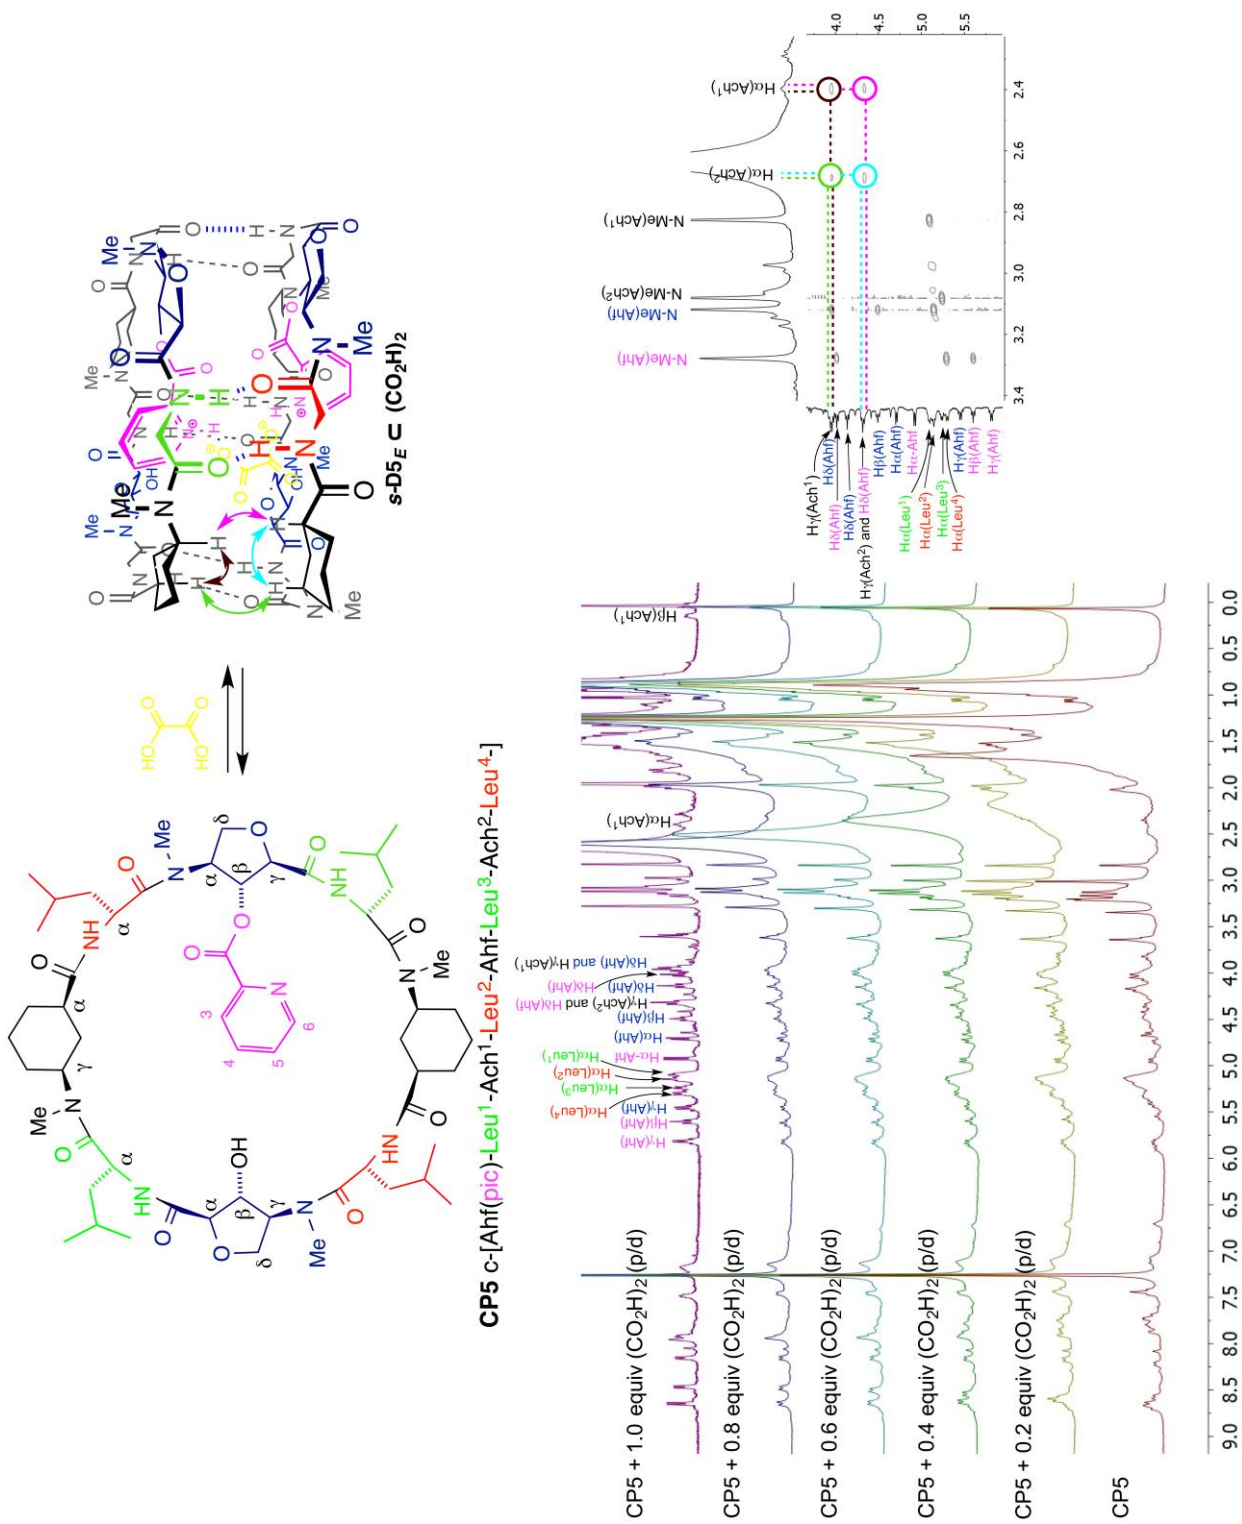

**Figure 7SI:** Top: Structure of **CP5** and model of the oxalic acid encapsulated in the corresponding dimer ( $s\text{-D5E} \rightleftharpoons (\text{CO}_2\text{H})_2$ ). Bottom left:  $^1\text{H}$  NMR studies of the formation of the dimer  $s\text{-D5E} \rightleftharpoons (\text{CO}_2\text{H})_2$  by the addition of different equivalents of oxalic acid (0.2-1.0 equiv per dimer) to a  $\text{CDCl}_3$  solution of **CP5** (5 mM,  $\text{CDCl}_3$ , 298 K). Bottom right: Selected parts of NOESY spectrum showing the nOe cross peaks between the  $\text{H}_\gamma$  of each Ach and both  $\text{H}_\alpha$  of the same residue that support the formation of the *syn*-eclipsed form ( $s\text{-D5E} \rightleftharpoons (\text{CO}_2\text{H})_2$ ).



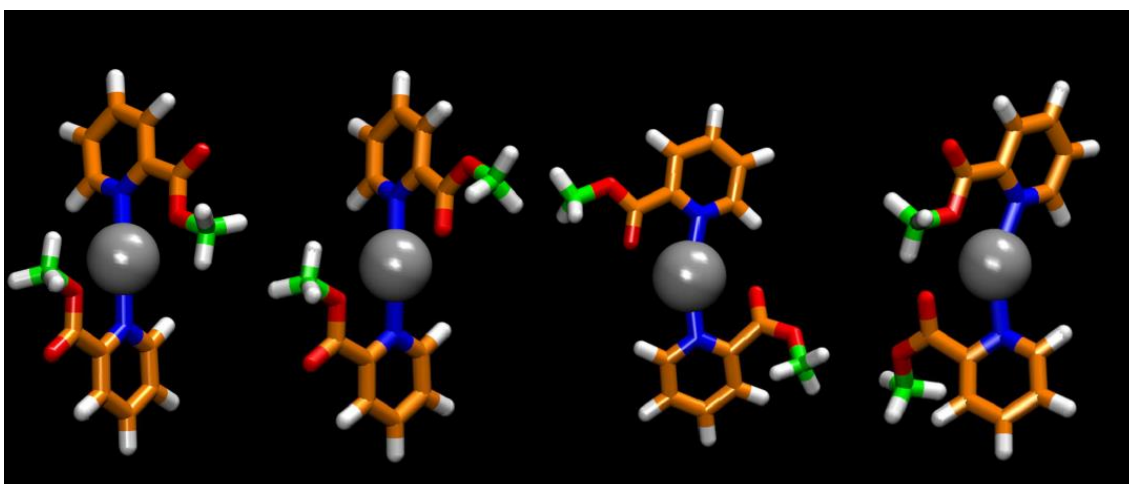

**Figure 8SI:** DFT Optimized structures of bis(methyl picolinate) silver(I) complexes with higher (less stable) energies compared to those presented in the main part of the manuscript. The energies of these conformations are about 11, 5, 13 and 18 kcal/mol (from left to right) less stable than those corresponding to the conformers presented there. The silver ion is in gray whereas the two picolinate are highlighted in orange.

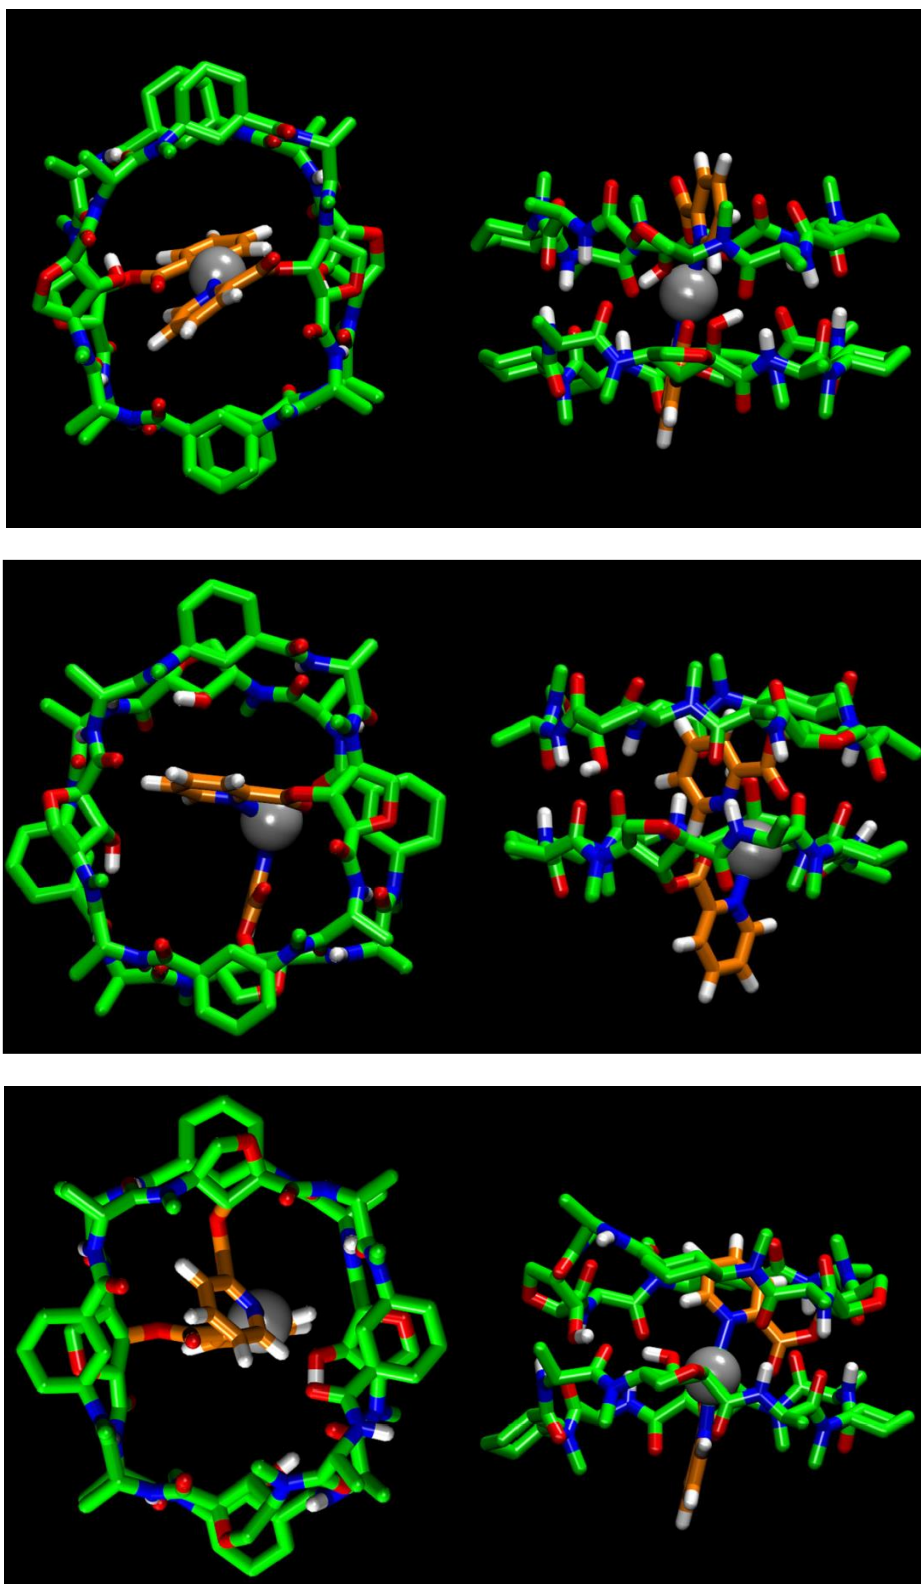

**Figure 9SI:** Top and lateral views of the DFT optimized structures for the *anti*-eclipsed, clockwise and counter-clockwise alternating dimers, respectively. All the hydrogens, except those from the backbone and those from the pyridines, have been removed for clarity. The side chains were changed to methyl groups to reduce the number of possible conformers.

## Materials and Methods:

### General:

1-[bis(dimethylamino)methylene]-1*H*-1,2,3-triazolo-[4,5-*b*]pyridinium hexafluorophosphate 3-oxide (*N*-HATU), 1-[bis(dimethylamino)methylene]-1*H*-benzotriazolium hexafluorophosphate 3-oxide (*N*-HBTU), 1-[bis(dimethylamino)methylene]-1*H*-benzotriazolium tetrafluoroborate 3-oxide (*N*-TBTU),<sup>1</sup> *N*-(3-dimethylaminopropyl)-*N'*-ethylcarbodiimide hydrochloride (EDC), 1-hydroxybenzotriazole (HOBt), 4-dimethylaminopyridine (DMAP) and  $\alpha$ -aminoacids were purchased from Iris Biotech, Aldrich or from Global Sales Manager, GL Biochem (Shanghai) Ltd, China. All reagents and solvents were used as received unless otherwise noted. CH<sub>2</sub>Cl<sub>2</sub> and DIEA to be used as reaction solvents were distilled from CaH<sub>2</sub> over argon immediately prior to use. Analytical thin-layer chromatography was performed on E. Merck silica gel 60 F<sub>254</sub> plates. Compounds, which were not UV active, were visualized by dipping the plates in a ninhydrin solution and heating. Silica gel flash chromatography was performed using E. Merck silica gel (type 60SDS, 230-400 mesh). Solvent mixtures for chromatography are reported as v/v ratios. HPLC purification was carried out on a HITACHI D-7000 using a Phenomenex Luna 5 $\mu$  Silica 100 Angstroms column with CH<sub>2</sub>Cl<sub>2</sub>/MeOH gradients between 96:4 and 87:13. <sup>1</sup>H NMR spectra were recorded on Varian Inova 500 MHz, Varian Mercury 300 MHz or Bruker DPX 250 MHz spectrometers. Chemical shifts ( $\delta$ ) were reported in parts per million (ppm) relative to tetramethylsilane ( $\delta$  = 0.00 ppm) or by the deuterated solvent. <sup>1</sup>H NMR splitting patterns are designated as singlet (s), doublet (d), triplet (t), or quartet (q). All first-order splitting patterns were assigned on the basis of the appearance of the multiplet. Splitting patterns that could not be easily interpreted are designated as multiplet (m) or broad (br). <sup>13</sup>C NMR spectra were recorded on Varian Mercury 300 MHz spectrometer. Carbon resonances were assigned using distortionless enhancement by polarization transfer (DEPT) spectra obtained with phase angles of 135. **<sup>1</sup>H NMR Assignments of Cyclic Peptides (CPs).** The signals of the <sup>1</sup>H NMR spectra of the peptides were identified from the corresponding double-quantum-filled 2D COSY, TOCSY and NOESY and/or ROESY spectra acquired at concentration and temperature indicated (Mixing times for NOESY and/or ROESY –between 250 and 1000 ms- were not optimized). Electrospray (ESI) mass spectra were recorded on a Bruker BIONTOF II mass spectrometer. FTIR measurements were made on a JASCO FT/IR-400 spectrophotometer placing the sample on a CaF<sub>2</sub> pellet.

---

<sup>1</sup> L. A. Carpino, et al., *Angew. Chem. Int. Ed.* **2002**, *41*, 41–445.

### Peptide synthesis:

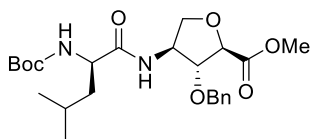

**Boc-D-Leu-L-Ahf(Bn)-OMe (3):** A solution of N<sub>3</sub>-L-Ahf(Bn)-OMe<sup>2</sup> (271 mg, 0.97 mmol) and Pd/C (208 mg, 10% in wt) in CH<sub>2</sub>Cl<sub>2</sub> (10 mL) was stirred at rt for 2 h under hydrogen atmosphere (balloon pressure).

The resulting mixture was filtered through a Celite pad, the residue was washed with CH<sub>2</sub>Cl<sub>2</sub>, and the combined filtrates and washes were concentrated under reduced pressure. The crude was used without further purification. A solution of the resulting NH<sub>2</sub>-L-Ahf(Bn)-OMe in CH<sub>2</sub>Cl<sub>2</sub> (15 mL) was successively treated with DIEA (0.71 mL, 3.9 mmol), Boc-D-Leu-OH (225 mg, 1.0 mmol), and N-HBTU (405.0 mg, 1.1 mmol), and the mixture was stirred at rt under Argon for 90 min. The solution was washed with aqueous HCl (5%, 3 x 20 mL) and aqueous saturated NaHCO<sub>3</sub> (2 x 20 mL). The organic layer was dried with anhydrous Na<sub>2</sub>SO<sub>4</sub>, filtered and concentrated under reduced pressure. The resulting crude was purified by flash chromatography (0-2% MeOH/CH<sub>2</sub>Cl<sub>2</sub>) to give 387 mg of dipeptide **3**. [Yellow foam, 86%, R<sub>f</sub> = 0.58 (5% MeOH/CH<sub>2</sub>Cl<sub>2</sub>)]. <sup>1</sup>H NMR (CDCl<sub>3</sub>, 250 MHz, δ): 7.51-7.24 (m, 6H), 6.63 (d, J = 8.1 Hz, 1H), 4.77 (AB, J = 11.8 Hz, 1H), 4.83-4.49 (m, 2H), 4.66 (AB, J = 11.8 Hz, 1H), 4.47 (d, J = 1.6 Hz, 1H), 4.24-3.91 (m, 3H), 3.77 (s, 3H), 1.86-1.51 (m, 3H), 1.43 (s, 9H), 0.93 (d, J = 5.7 Hz, 6H). <sup>13</sup>C NMR (CDCl<sub>3</sub>, 75.4 MHz, δ): 172.8 (CO), 171.7 (CO), 155.4 (CO), 137.3 (C), 128.3 (CH), 127.8 (CH), 127.7 (CH), 86.6 (CH), 82.1 (CH), 79.8 (C), 72.5 (CH<sub>2</sub>), 71.8 (CH<sub>2</sub>), 54.7 (CH<sub>3</sub>), 53.4 (CH), 52.4 (CH), 41.4 (CH<sub>2</sub>), 28.2 (CH<sub>3</sub>), 24.7 (CH<sub>3</sub>), 24.6 (CH<sub>3</sub>), 23.0 (CH). **MS (ESI)** [m/z(%): 487 ([MNa]<sup>+</sup>), 465 ([MH]<sup>+</sup>). **HRMS (ESI) calculated** for C<sub>24</sub>H<sub>37</sub>N<sub>2</sub>O<sub>7</sub>: 465.2595, **found**: 465.2595.

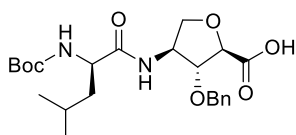

**Boc-D-Leu-L-Ahf(Bn)-OH (dp2):** A solution of dipeptide **3** (387 mg, 0.83 mmol) in a mixture of MeOH and water (3:1, 20 mL) was treated with LiOH (100 mg, 4.2 mmol). The solution was stirred at rt for 5 h

and then the solvent was removed under reduced pressure. The resulting residue was diluted with water (10 mL) and washed with Et<sub>2</sub>O (10 mL), and the resulting aqueous solution was acidified to pH 3 with aqueous HCl (5%). The acidic solution was extracted with CH<sub>2</sub>Cl<sub>2</sub> (4 x 10 mL), the combined organic extracts were dried with anhydrous Na<sub>2</sub>SO<sub>4</sub>, filtered and concentrated under reduced pressure to give 365 mg of dipeptide **dp2**. [Yellow foam, 97%, R<sub>f</sub> = 0.20 (5% MeOH/CH<sub>2</sub>Cl<sub>2</sub>)]. <sup>1</sup>H RMN (CDCl<sub>3</sub>, 300 MHz, δ): 10.1 (br, 1H), 7.56 (d, J = 6.8 Hz, 1H), 7.49-7.14 (m, 5H), 6.42 (d, J = 7.0 Hz, 1H), 5.35 (d, J = 8.4 Hz, 1H), 4.78 (AB, J = 11.9 Hz, 1H), 4.69 (AB, J = 11.6 Hz, 1H), 4.57-3.91 (m, 5H), 1.74-1.39 (m, 3H), 1.41 and 1.37 (s, 9H), 0.91 (d, J = 6.3 Hz,

<sup>2</sup> N. Rodríguez-Vázquez, S. Salzinger, L. F. Silva, M. Amorín, J. R. Granja, *Eur. J. Org. Chem.* **2013**, *17*, 3477–3493.

3H), 0.89 (d,  $J = 6.3$  Hz, 3H).  $^{13}\text{C}$  RMN ( $\text{CDCl}_3$ , 75.4 MHz,  $\delta$ ): 173.7 (CO), 172.6 (CO), 156.5 (CO), 137.4 (C), 128.4 (CH), 127.8 (CH), 127.6 (CH), 87.1 (CH), 82.0 (CH), 81.8 (C), 72.6 ( $\text{CH}_2$ ), 71.8 ( $\text{CH}_2$ ), 54.9 (CH), 53.5 (CH), 41.2 ( $\text{CH}_2$ ), 28.2 ( $\text{CH}_3$ ), 24.7 ( $\text{CH}_3$ ), 23.0 ( $\text{CH}_3$ ), 21.9 (CH). **MS (ESI)** [ $m/z$ (%)]: 473 ( $[\text{MNa}]^+$ ), 452 ( $[\text{MH}]^+$ ). **HRMS (ESI) calculated** for  $\text{C}_{23}\text{H}_{35}\text{N}_2\text{O}_7$ : 452.2425, **found**: 452.2439.

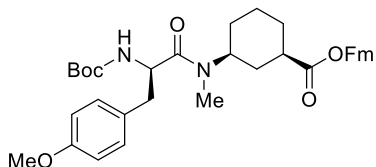

**Boc-*D*-Tyr(Me)-*L*-<sup>Me</sup>N-Ach-OFm (dp1):** A solution of Boc-*L*-<sup>Me</sup>N-Ach-OFm (811 mg, 1.86 mmol) in mixture of TFA and  $\text{CH}_2\text{Cl}_2$  (1:1, 10 mL) was stirred at rt for 10 min. After removal of the solvent under vacuum, the residue was dried under high

vacuum for 3 h. The resulting TFA salt was dissolved under Argon in  $\text{CH}_2\text{Cl}_2$  (10 mL), then DIEA (1.3 mL, 7.5 mmol), Boc-*D*-Tyr(Me)-OH (550 mg, 1.9 mmol) and *N*-HATU (778 mg, 2.0 mmol) were successively added. After 1 h stirring at rt, the solution was washed with aqueous HCl (5%, 2 x 10 mL) and aqueous saturated  $\text{NaHCO}_3$  (2 x 10 mL). The organic layer was dried with anhydrous  $\text{Na}_2\text{SO}_4$ , filtered and concentrated under reduced pressure, providing a yellow oil that was purified by flash chromatography (0-2% MeOH/ $\text{CH}_2\text{Cl}_2$ ) to give 1.0 g of dipeptide **dp1**. [White foam, 95%,  $R_f = 0.75$  (5% MeOH/ $\text{CH}_2\text{Cl}_2$ )].  $^1\text{H}$  NMR ( $\text{CDCl}_3$ , 300 MHz,  $\delta$ ): 7.71 (m, 2H), 7.61 (d,  $J = 7.4$  Hz, 1H), 7.54 (m, 2H), 7.43-7.20 (m, 4H), 7.08 (m, 2H), 6.76 (m, 2H), 5.51 (m, 1H), 4.73 (m, 1H), 4.46-4.32 (m, 2H), 4.22-4.04 (m, 1H), 4.14 (AB,  $J = 6.6$  Hz, 1H), 3.95 (AB,  $J = 6.6$  Hz, 1H), 3.73 and 3.60 (s, 3H), 2.89 (m, 1H), 2.70 and 2.46 (s, 3H), 1.96-0.71 (m, 8H), 1.42 and 1.40 (s, 9H).  $^{13}\text{C}$  NMR ( $\text{CDCl}_3$ , 75.4 MHz,  $\delta$ ): 174.6 (CO), 171.3 (CO), 158.5 (C), 155.0 (CO), 144.7 (C), 130.4 (CH), 128.4 (C), 127.7 (CH), 127.0 (CH), 124.8 (CH), 119.9 (CH), 113.7 (CH), 79.5 (C), 65.9 ( $\text{CH}_2$ ), 55.1 (CH), 51.5 (CH), 50.3 ( $\text{CH}_3$ ), 46.9 (CH), 42.2 (CH), 39.3 ( $\text{CH}_2$ ), 38.4 ( $\text{CH}_3$ ), 31.3 ( $\text{CH}_2$ ), 29.7 ( $\text{CH}_2$ ), 28.2 ( $\text{CH}_3$ ), 24.2 ( $\text{CH}_2$ ). **MS (ESI)** [ $m/z$ (%)]: 635.3 ( $[\text{MNa}]^+$ , 62), 613.3 ( $[\text{MH}]^+$ , 38), 557.3 ( $[\text{MH}-t\text{Bu}]^+$ , 97), 513.3 ( $[\text{MH}-\text{Boc}]^+$ , 100). **HRMS (ESI) calculated** for  $\text{C}_{37}\text{H}_{45}\text{N}_2\text{O}_6$ : 613.3272, **found**: 613.3273.

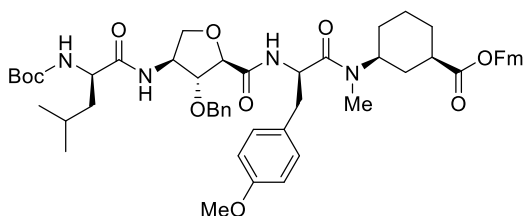

**Boc-*D*-Leu-*L*-Ahf(Bn)-*D*-Tyr(Me)-*L*-<sup>Me</sup>N-Ach-OFm (tp1):** A solution of dipeptide **dp1** (497.0 mg, 0.81 mmol) in mixture of TFA and  $\text{CH}_2\text{Cl}_2$  (1:1, 10.0 mL) was stirred at rt for 30 min. After removal of the solvent under vacuum, the residue was dried

under high vacuum for 3 h. The resulting TFA salt (**dp3**) was dissolved under Argon in dry  $\text{CH}_2\text{Cl}_2$  (14 mL), then DIEA (560  $\mu\text{L}$ , 3.2 mmol), dipeptide **dp2** (365 mg, 0.81 mmol), and *N*-HBTU (338 mg, 0.89 mmol) were successively added. After 2 h stirring at rt, the solution was washed with aqueous HCl (5%, 2 x 15 mL) and aqueous saturated  $\text{NaHCO}_3$  (2 x 15 mL). The organic layer was dried with anhydrous  $\text{Na}_2\text{SO}_4$ , filtered and concentrated under reduced pressure. The resulting

crude was purified by flash chromatography (0-2% MeOH/CH<sub>2</sub>Cl<sub>2</sub>) to give 645 mg of tetrapeptide **tp1**. [White foam, 84%,  $R_f = 0.42$  (5% MeOH/CH<sub>2</sub>Cl<sub>2</sub>)]. **MS (ESI)** [ $m/z(\%)$ ]: 967.5 ([MNa]<sup>+</sup>, 30), 945.5 ([MH]<sup>+</sup>, 12), 748.4 (100). **HRMS (ESI) calculated** for C<sub>55</sub>H<sub>69</sub>N<sub>4</sub>O<sub>10</sub>: 945.5008, **found**: 945.5001.

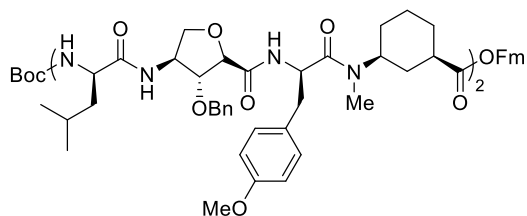

**Boc-[D-Leu-L-Ahf(Bn)-D-Tyr(Me)-L-MeN-Ach]-**

**OFm (op1):** A solution of tetrapeptide **tp1** (305 mg, 0.32 mmol) in a mixture of piperidine and CH<sub>2</sub>Cl<sub>2</sub> (1:4, 6 mL) was stirred at rt for 45 min. The solution was washed with aqueous HCl (5%, 4 x 5

mL), dried with anhydrous Na<sub>2</sub>SO<sub>4</sub>, filtered and concentrated, to give Boc-*D*-Leu-*L*-Ahf(Bn)-*D*-Leu-*L*-MeN-Ach-OH (**tp2**), which was used without further purification.

A solution of tetrapeptide **tp1** (305 mg, 0.32 mmol) in mixture of TFA and CH<sub>2</sub>Cl<sub>2</sub> (1:1, 8 mL) was stirred at rt for 15 min. After removal of the solvent under vacuum, the residue was dried under high vacuum for 3 h. The resulting TFA salt (**tp3**) was dissolved in dry CH<sub>2</sub>Cl<sub>2</sub> (12 mL) under Argon, and successively treated with DIEA (222  $\mu$ L, 1.3 mmol), the previously prepared **tp2** and *N*-HBTU (134 mg, 0.35 mmol). After 1 h stirring at rt, the solution was washed with aqueous HCl (5%, 2 x 10 mL) and aqueous saturated NaHCO<sub>3</sub> (2 x 10 mL). The organic layer was dried with anhydrous Na<sub>2</sub>SO<sub>4</sub>, filtered and concentrated under reduced pressure. The resulting crude was purified by flash chromatography (0-2% MeOH/CH<sub>2</sub>Cl<sub>2</sub>) to give 360 mg of octapeptide **op1**. [White foam, 70%,  $R_f = 0.45$  (5% MeOH/CH<sub>2</sub>Cl<sub>2</sub>)]. **MS (ESI)** [ $m/z(\%)$ ]: 1593.8 ([MH]<sup>+</sup>, 8), 845.4 ([tetrapeptide-Boc]<sup>+</sup>, 100), 747.9 ([MH-Boc]<sup>2+</sup>, 14). **HRMS (ESI) calculated** for C<sub>91</sub>H<sub>117</sub>N<sub>8</sub>O<sub>17</sub>: 1593.8531, **found**: 1593.8586.

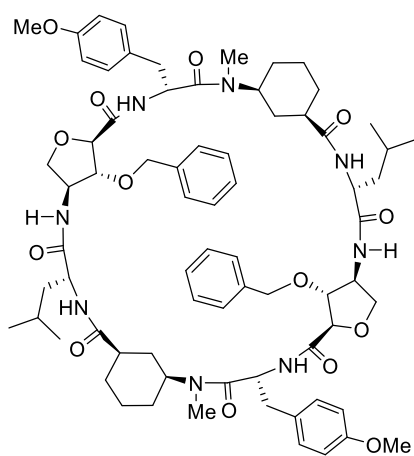

**c-[[L-Ahf(Bn)-D-Tyr(Me)-L-MeN-Ach-D-Leu-]2] (CP1):** The linear octapeptide **op1** (150.0 mg, 94.1  $\mu$ mol) was dissolved in a mixture of piperidine and CH<sub>2</sub>Cl<sub>2</sub> (1:4, 5 mL) and stirred at rt for 45 min. The solution was washed with aqueous HCl (5%, 4 x 5 mL), dried with anhydrous Na<sub>2</sub>SO<sub>4</sub>, filtered and concentrated to give Boc-*D*-Leu-*L*-Ahf(Bn)-*D*-Tyr(Me)-*L*-MeN-Ach]<sub>2</sub>-OH, which was used without further purification. The resulting C-unprotected octapeptide was dissolved in a mixture of TFA and CH<sub>2</sub>Cl<sub>2</sub>

(1:1, 10 mL) and stirred at rt for 30 min. After removal of the solvent under reduced pressure, the residue was dried under high vacuum for 3 h and used without further purification. The

resulting unprotected linear peptide (**op2**) was dissolved in dry CH<sub>2</sub>Cl<sub>2</sub> (95 mL) and successively treated with DIEA (66 μL, 0.38 mmol) and *N*-TBTU (39.2 mg, 0.10 mmol). After 12 h, the solvent was removed under reduced pressure, and the residue was dissolved in CH<sub>2</sub>Cl<sub>2</sub> (15 mL), washed with aqueous HCl (10%, 2 x 10 mL), dried with anhydrous Na<sub>2</sub>SO<sub>4</sub>, filtered and concentrated to dryness. The crude was purified by flash chromatography (0-5% MeOH/CH<sub>2</sub>Cl<sub>2</sub>) to give 62.5 mg of the desired cyclicpeptide. [White solid, 51%, *R*<sub>f</sub> = 0.47 (5% MeOH/CH<sub>2</sub>Cl<sub>2</sub>)]. **<sup>1</sup>H NMR** (7.5 mM, CDCl<sub>3</sub>, 300 MHz, δ): 7.29 (m, 12H), 7.09 (d, *J* = 8.6 Hz, 5H), 6.82 (d, *J* = 8.5 Hz, 5H), 6.53 (d, *J* = 8.7 Hz, 1H), 5.59 (d, *J* = 9.3 Hz, 1H), 4.99-3.82 (m, 18H), 3.80 (s, 6H), 3.44 (m, 2H), 2.53 (m, 2H), 2.24 (s, 6H), 2.11-1.08 (m, 26H), 0.90 (d, *J* = 7.5 Hz, 6H), 0.87 (d, *J* = 6.8 Hz, 6H). **<sup>13</sup>C NMR** (CDCl<sub>3</sub>, 75.4 MHz, δ): 175.2 (CO), 174.0 (CO), 172.7 (CO), 172.0 (CO), 170.0 (C), 159.2 (C), 137.7 (C), 130.5 (CH), 128.5 (CH), 127.4 (CH), 114.2 (CH), 87.7 (CH), 84.9 (CH), 72.4 (CH<sub>2</sub>), 72.1 (CH<sub>2</sub>), 55.7 (CH), 55.5 (CH<sub>3</sub>), 51.9 (CH), 45.0 (CH), 42.1 (CH<sub>2</sub>), 39.6 (CH<sub>2</sub>), 32.8 (CH<sub>2</sub>), 29.6 (CH<sub>3</sub>), 28.5 (CH<sub>2</sub>), 25.2 (CH), 24.9 (CH<sub>2</sub>), 23.3 (CH<sub>3</sub>), 21.4 (CH<sub>3</sub>). **FTIR** (298 K, CHCl<sub>3</sub>): 3297 (amide A), 3006, 2958, 2933, 2869, 1655 (amide II), 1626 (amide I), 1514 cm<sup>-1</sup> (amide II). **MS (ESI)** [*m/z*(%)]: 1319.7 ([MNa]<sup>+</sup>, 19), 1297.7 ([MH]<sup>+</sup>, 12), 668.3 ([MHK]<sup>2+</sup>, 100), 660.8 ([MHNH]<sup>2+</sup>, 23). **HRMS (ESI) calculated** for C<sub>72</sub>H<sub>97</sub>N<sub>8</sub>O<sub>14</sub>: 1297.7119, **found**: 1297.7111.

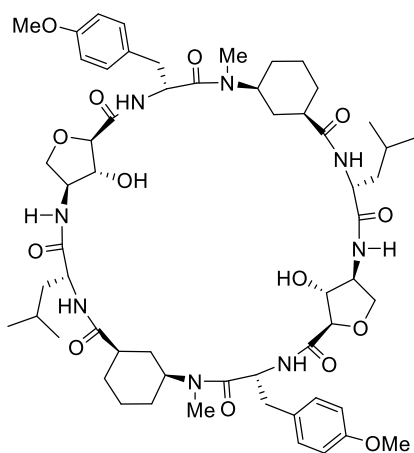

**c-[[L-Ahf-D-Tyr(Me)-L-MeN-Ach-D-Leu-]2] (CP2):** A solution of **CP1** (42 mg, 0.032 mmol) in TFA (1 mL) was successively treated with pentamethylbenzene (21 mg, 0.13 mmol), anisole (21 μL, 0.18 mmol) and HBr in AcOH (0.5 mL, 33% in wt). The resulting mixture was stirred at rt for 1h. The solvent was removed under reduced pressure and the crude was purified by HPLC (Phenomenex Luna 5μ silica, 4-8% MeOH/CH<sub>2</sub>Cl<sub>2</sub>, 25 min) to give 16.3 mg of the desired cyclic peptide.

[White solid, 45%, *t*<sub>R</sub> = 19 min]. **<sup>1</sup>H NMR** (20 mM, CDCl<sub>3</sub>, 300 MHz, δ): 9.27 (d, *J* = 9.1 Hz, 2H, NH<sub>Tyr</sub>), 8.52 (d, *J* = 8.9 Hz, 2H, NH<sub>Ahf</sub>), 8.24 (d, *J* = 8.9 Hz, 2H, NH<sub>Leu</sub>), 7.07 (m, 4H, Ar), 6.79 (m, 4H, Ar), 5.19 (m, 2H, Hα<sub>Tyr</sub>), 4.83 (br, 2H, OH), 4.74 (s, 2H, Hα<sub>Ahf</sub>), 4.61 (m, 4H, Hα<sub>Leu</sub> + Hγ<sub>Ach</sub>), 4.47 (dd, *J*<sub>1</sub> = 9.7 Hz, *J*<sub>2</sub> = 3.8 Hz, 2H, Hγ<sub>Ahf</sub>), 4.22 (s, 2H, Hβ<sub>Ahf</sub>), 4.13 (dd, *J*<sub>1</sub> = 9.4 Hz, *J*<sub>2</sub> = 4.2 Hz, 2H, Hδ<sub>Ahf</sub>), 3.86 (d, *J* = 8.9 Hz, 2H, Hδ<sub>Ahf</sub>), 3.79 (s, 6H, OMe<sub>Tyr</sub>), 2.97 (m, 4H, Hβ<sub>Tyr</sub>), 2.48 (s, 6H, NMe), 1.95 (m, 2H, Hα<sub>ACH</sub>), 1.85-1.09 (m, 22H, CH<sub>2</sub><sub>Ach</sub> + CH<sub>2</sub><sub>Leu</sub> + CH<sub>Leu</sub>), 0.94 (d, *J* = 6.4 Hz, 6H, CH<sub>3</sub><sub>Leu</sub>), 0.91 (d, *J* = 5.6 Hz, 6H, CH<sub>3</sub><sub>Leu</sub>). **<sup>13</sup>C NMR** (CDCl<sub>3</sub>, 75.4 MHz, δ): 175.0 (CO), 172.2 (CO), 171.4 (CO), 170.4 (CO), 158.9 (C), 130.5 (CH), 128.1 (C), 114.0 (CH), 85.3 (CH), 78.7 (CH), 74.8 (CH<sub>2</sub>), 57.9

(CH), 55.5 (CH<sub>3</sub>), 51.6 (CH), 50.3 (CH), 43.8 (CH<sub>2</sub>), 43.5 (CH), 39.6 (CH<sub>2</sub>), 32.8 (CH<sub>2</sub>), 29.9 (CH<sub>3</sub>), 28.6 (CH<sub>2</sub>), 28.1 (CH<sub>2</sub>), 25.2 (CH), 24.8 (CH<sub>2</sub>), 22.9 (CH<sub>3</sub>), 22.8 (CH<sub>3</sub>). **FTIR** (298 K, CHCl<sub>3</sub>): 3399, 3299 (amide A), 3006, 2958, 2933, 2865, 1652 (amide I<sub>II</sub>), 1629 (amide I), 1513 cm<sup>-1</sup> (amide II). **MS (ESI)** [*m/z*(%)]: 1140.6 ([MNa]<sup>+</sup>, 7), 1117.6 ([MH]<sup>+</sup>, 8), 578.3 ([MHK]<sup>2+</sup>, 100), 570.3 ([MHN]<sup>2+</sup>, 40). **HRMS (ESI) calculated** for C<sub>58</sub>H<sub>85</sub>N<sub>8</sub>O<sub>14</sub>: 1117.6180, **found**: 1117.6227.

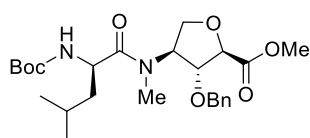

**Boc-D-Leu-L-MeN-Ahf(Bn)-OMe (4):** A solution of *L*-MeN-Ahf(Bn)-OMe<sub>2</sub> (600 mg, 2.26 mmol) in dry CH<sub>2</sub>Cl<sub>2</sub> (22 mL) was successively treated with DIEA (1.6 mL, 9.0 mmol), Boc-D-Leu-OH (523 mg, 2.3 mmol) and *N*-HATU (946 mg, 2.5 mmol). The mixture was stirred at rt under Argon for 90 min. The solution was washed with aqueous HCl (5%, 3 x 20 mL) and aqueous saturated NaHCO<sub>3</sub> (2 x 20 mL). The organic layer was dried with anhydrous Na<sub>2</sub>SO<sub>4</sub>, filtered and concentrated under reduced pressure. The resulting crude was purified by flash chromatography (0-2% MeOH/CH<sub>2</sub>Cl<sub>2</sub>) to give 1.0 g of dipeptide **4**. [Yellow foam, 93%, R<sub>f</sub> = 0.53 (5% MeOH/CH<sub>2</sub>Cl<sub>2</sub>)]. **<sup>1</sup>H NMR** (CDCl<sub>3</sub>, 300 MHz, δ): 7.44-7.19 (m, 5H), 5.17 (m, 1H), 5.00 (m, 1H), 4.76 (AB, *J* = 11.9 Hz, 1H), 4.68-4.31 (m, 1H), 4.59 (AB, *J* = 12.0 Hz, 1H), 4.38 (d, *J* = 4.5 Hz, 1H), 4.19-3.98 (m, 3H), 3.72 (s, 3H), 2.79 (s, 3H), 1.80-1.25 (m, 3H), 1.42 (s, 9H), 0.98 (d, *J* = 6.7 Hz, 3H), 0.93 (d, *J* = 6.7 Hz, 3H). **<sup>13</sup>C NMR** (CDCl<sub>3</sub>, 75.4 MHz, δ): 173.5 (CO), 170.6 (CO), 155.7 (CO), 137.3 (C), 128.3 (CH), 128.0 (CH), 127.8 (CH), 85.5 (CH), 82.4 (CH), 79.5 (C), 71.9 (CH<sub>2</sub>), 69.3 (CH<sub>2</sub>), 61.1 (CH), 52.3 (CH<sub>3</sub>), 49.2 (CH), 42.2 (CH<sub>2</sub>), 31.5 (CH<sub>3</sub>), 28.3 (CH<sub>3</sub>), 24.6 (CH), 23.4 (CH<sub>3</sub>), 21.6 (CH<sub>3</sub>). **MS (ESI)** [*m/z*(%)]: 501.2 ([MNa]<sup>+</sup>, 100), 423.2 ([MH-<sup>t</sup>Bu]<sup>+</sup>, 13), 379.2 ([MH-Boc]<sup>+</sup>, 6). **HRMS (ESI) calculated** for C<sub>25</sub>H<sub>38</sub>N<sub>2</sub>NaO<sub>7</sub>: 501.2571, **found**: 501.2581.

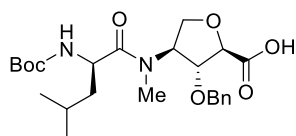

**Boc-D-Leu-L-MeN-Ahf(Bn)-OH (dp5):** A solution of dipeptide **4** (700 mg, 1.5 mmol) in a mixture of MeOH and water (3:1, 29 mL) was treated with LiOH (175 mg, 7.3 mmol). The solution was stirred at rt for 2 h and then the solvent was removed under reduced pressure. The resulting residue was diluted with water (15 mL), washed with Et<sub>2</sub>O (10 mL) and the resulting aqueous solution was acidified to pH 3 with aqueous HCl (5%). The acidic solution was extracted with CH<sub>2</sub>Cl<sub>2</sub> (4 x 10 mL) and the combined organic extracts were dried with anhydrous Na<sub>2</sub>SO<sub>4</sub>, filtered and concentrated under reduced pressure to give 670 mg of the desired dipeptide. [White foam, 99%, R<sub>f</sub> = 0.32 (5% MeOH/CH<sub>2</sub>Cl<sub>2</sub>)]. **<sup>1</sup>H RMN** (CDCl<sub>3</sub>, 300 MHz, δ): 9.70 (br, 1H), 7.52-7.10 (m, 5H),

<sup>2</sup> N. Rodríguez-Vázquez, S. Salzinger, L. F. Silva, M. Amorín, J. R. Granja, *Eur. J. Org. Chem.* **2013**, 17, 3477–3493.



5.61 (m, 1H), 4.90 (m, 1H), 4.75 (AB,  $J = 11.9$  Hz, 1H), 4.68-4.40 (m, 1H), 4.63 (AB,  $J = 11.6$  Hz, 1H), 4.43 (dd,  $J_1 = 4.3$  Hz,  $J_2 = 1.4$  Hz, 1H), 4.26 (m, 1H), 4.11 (m, 2H), 3.04 (s, 3H), 1.78-1.23 (m, 3H), 1.41 (s, 9H), 0.96 (d,  $J = 6.5$  Hz, 3H), 0.92 (d,  $J = 6.6$  Hz, 3H).  $^{13}\text{C}$  RMN (CDCl<sub>3</sub>, 75.4 MHz,  $\delta$ ): 174.3 (CO), 172.8 (CO), 156.2 (CO), 137.4 (C), 128.5 (CH), 128.0 (CH), 127.9 (CH), 86.4 (CH), 82.5 (CH), 80.1 (C), 72.2 (CH<sub>2</sub>), 69.4 (CH<sub>2</sub>), 62.3 (CH), 49.6 (CH), 41.9 (CH<sub>2</sub>), 32.3 (CH<sub>3</sub>), 28.4 (CH<sub>3</sub>), 24.7 (CH), 23.5 (CH<sub>3</sub>), 21.7 (CH<sub>3</sub>). **MS (ESI)** [ $m/z(\%)$ ]: 487.2 ([MNa]<sup>+</sup>, 100), 409.2 ([MH-<sup>t</sup>Bu]<sup>+</sup>, 21), 365.2 ([MH-Boc]<sup>+</sup>, 16). **HRMS (ESI) calculated** for C<sub>24</sub>H<sub>36</sub>N<sub>2</sub>NaO<sub>7</sub>: 487.2415, **found**: 487.2395.

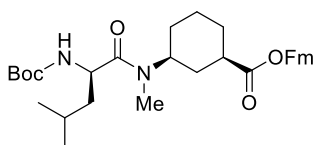

**Boc-D-Leu-L-Me-N-Ach-OFm (dp4):** A solution of Boc-L-Me-N-Ach-OFm (700 mg, 1.6 mmol) in a mixture of TFA and CH<sub>2</sub>Cl<sub>2</sub> (1:1, 8 mL) was stirred at rt for 15 min. After removal of the solvent

under vacuum, the residue was dried under high vacuum for 3 h. The resulting TFA salt was dissolved under Argon in dry CH<sub>2</sub>Cl<sub>2</sub> (16 mL), and DIEA (1.1 mL, 6.4 mmol), Boc-D-Leu-OH (372 mg, 1.6 mmol), and N-HATU (669 mg, 1.8 mmol) were successively added. After 1 h stirring at rt, the solution was washed with aqueous HCl (5%, 2 x 15 mL) and aqueous saturated NaHCO<sub>3</sub> (2 x 15 mL). The organic layer was dried with anhydrous Na<sub>2</sub>SO<sub>4</sub>, filtered and concentrated under reduced pressure, providing a yellow oil that was purified by flash chromatography (30% EtAcO/hexanes) to give 755 mg of the dipeptide. [White foam, 86%,  $R_f = 0.65$  (50% EtAcO/hexanes)].  $^1\text{H}$  NMR (CDCl<sub>3</sub>, 300 MHz,  $\delta$ ): 7.76 (d,  $J = 7.6$  Hz, 2H), 7.57 (d,  $J = 7.6$  Hz, 2H), 7.36 (td,  $J_1 = 25.0$  Hz,  $J_2 = 7.6$  Hz, 4H), 5.31 (d,  $J = 9.2$  Hz, 1H), 4.64 (m, 1H), 4.53-4.35 (m, 3H), 4.19 (t,  $J = 6.7$  Hz, 1H), 2.90 and 2.79 (s, 3H), 2.08-1.12 (m, 11H), 1.42 (s, 9H), 0.99 (dd,  $J = 6.5$  Hz,  $J = 1.9$  Hz, 3H), 0.91 (dd,  $J = 6.7$  Hz,  $J = 1.4$  Hz, 3H).  $^{13}\text{C}$  NMR (CDCl<sub>3</sub>, 75.4 MHz,  $\delta$ ): 174.9 (CO), 172.8 (CO), 155.7 (CO), 143.8 (C), 141.4 (C), 127.9 (CH), 127.2 (CH), 125.1 (CH), 120.1 (CH), 79.5 (C), 66.2 (CH<sub>2</sub>), 55.1 (CH), 51.7 (CH), 49.2 (CH), 47.1 (CH), 42.9 (CH<sub>2</sub>), 42.6 (CH), 32.8 (CH<sub>2</sub>), 31.6 (CH<sub>2</sub>), 29.3 (CH<sub>3</sub>), 29.0 (CH<sub>2</sub>), 28.5 (CH<sub>3</sub>), 24.8 (CH), 24.5 (CH<sub>2</sub>), 23.6 (CH<sub>3</sub>), 21.8 (CH<sub>3</sub>). **MS (ESI)** [ $m/z(\%)$ ]: 571.3 ([MNa]<sup>+</sup>, 24), 549.3 ([MH]<sup>+</sup>, 11), 493.3 ([MH-<sup>t</sup>Bu]<sup>+</sup>, 100), 449.3 ([MH-Boc]<sup>+</sup>, 100). **HRMS (ESI) calculated** for C<sub>33</sub>H<sub>45</sub>N<sub>2</sub>O<sub>5</sub>: 549.3323, **found**: 549.3323.

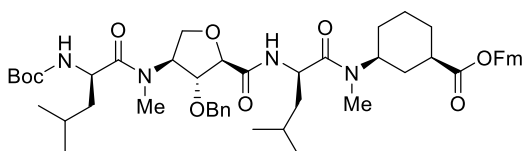

**Boc-D-Leu-L-Me-N-Ahf(Bn)-D-Leu-L-Me-N-Ach-OFm (tp4):** A solution of dipeptide **dp4** (700 mg, 1.2 mmol) in a mixture of TFA and CH<sub>2</sub>Cl<sub>2</sub> (1:1, 10 mL) was stirred at rt for 30 min. After removal of the solvent under vacuum, the residue was dried

under high vacuum for 3 h. The resulting TFA salt (**dp6**) was dissolved in dry CH<sub>2</sub>Cl<sub>2</sub> (12 mL) under Argon, then DIEA (850  $\mu$ L, 4.8 mmol), dipeptide **dp5** (562 mg, 1.2 mmol) and N-HBTU (504 mg, 1.3 mmol) were successively added. After 2 h stirring at rt, the solution was washed with

aqueous HCl (5%, 2 x 10 mL) and aqueous saturated NaHCO<sub>3</sub> (2 x 10 mL). The organic layer was dried with anhydrous Na<sub>2</sub>SO<sub>4</sub>, filtered and concentrated under reduced pressure. The resulting crude was purified by flash chromatography (0-2% MeOH/CH<sub>2</sub>Cl<sub>2</sub>) to give 1.1 g of the tetrapeptide **tp4**. [White foam, 99%, R<sub>f</sub> = 0.41 (2% MeOH/CH<sub>2</sub>Cl<sub>2</sub>)]. **MS (ESI)** [m/z(%): 933.4 ([MK]<sup>+</sup>, 3), 917.5 ([MNa]<sup>+</sup>, 82), 895.5 ([MH]<sup>+</sup>, 100), 795.5 ([MH-Boc]<sup>+</sup>, 4). **HRMS (ESI) calculated** for C<sub>52</sub>H<sub>71</sub>N<sub>4</sub>O<sub>9</sub>: 895.5216, **found**: 895.5204.

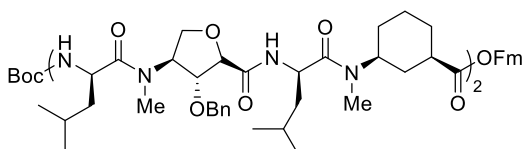

**Boc-[D-Leu-L-MeN-Ahf(Bn)-D-Leu-L-MeN-Ach]<sub>2</sub>-OFm (op3)**: A solution of tetrapeptide **tp4** (515 mg, 0.46 mmol) in a mixture of piperidine and

CH<sub>2</sub>Cl<sub>2</sub> (1:4, 5 mL) was stirred at rt for 45 min. The solution was washed with aqueous HCl (5%, 4 x 10 mL), dried with anhydrous Na<sub>2</sub>SO<sub>4</sub>, filtered and concentrated, to give Boc-*D*-Leu-*L*-<sup>Me</sup>N-Ahf(Bn)-*D*-Leu-*L*-<sup>Me</sup>N-Ach-OH (**tp5**), which was used without further purification.

A solution of tetrapeptide **tp4** (515 mg, 0.46 mmol) in a mixture of TFA and CH<sub>2</sub>Cl<sub>2</sub> (1:1, 6 mL) was stirred at rt for 30 min. After removal of the solvent under vacuum, the residue was dried under high vacuum for 3 h. The resulting TFA salt (**tp6**) was dissolved in dry CH<sub>2</sub>Cl<sub>2</sub> (5 mL) under Argon, and successively treated with DIEA (320 μL, 1.9 mmol), the previously prepared **tp5** and *N*-HBTU (193 mg, 0.51 mmol). After 2 h stirring at rt, the solution was washed with aqueous HCl (5%, 2 x 10 mL) and aqueous saturated NaHCO<sub>3</sub> (2 x 10 mL). The organic layer was dried with anhydrous Na<sub>2</sub>SO<sub>4</sub>, filtered and concentrated under reduced pressure. The resulting crude was purified by flash chromatography (0-5% MeOH/CH<sub>2</sub>Cl<sub>2</sub>) to give 683 mg of the desired octapeptide (**op3**). [White foam, 98%, R<sub>f</sub> = 0.35 (2% MeOH/CH<sub>2</sub>Cl<sub>2</sub>)]. **MS (ESI)** [m/z(%): 1531.8 ([MK]<sup>+</sup>, 1), 1516.9 ([MNa]<sup>+</sup>, 24), 1493.9 ([MH]<sup>+</sup>, 10), 774.7 (100), 769.9 ([MNa]<sup>2+</sup>, 24), 697.4 ([MH-Boc]<sup>2+</sup>, 97). **HRMS (ESI) calculated** for C<sub>85</sub>H<sub>121</sub>N<sub>8</sub>O<sub>15</sub>: 1493.8946, **found**: 1493.8971.

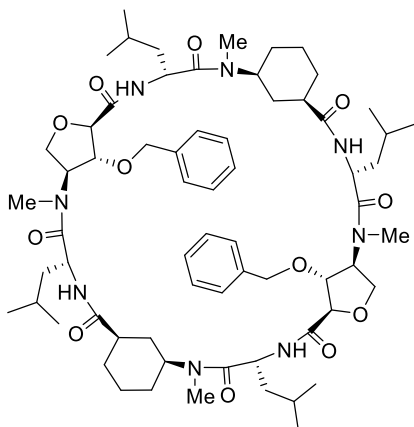

**c-[[L-MeN-Ahf(Bn)-D-Leu<sup>1</sup>-L-MeN-Ach-D-Leu<sup>2</sup>-]<sub>2</sub>] (CP3)**: The linear octapeptide **op3** (400 mg, 0.27 mmol) was dissolved in a mixture of piperidine and CH<sub>2</sub>Cl<sub>2</sub> (1:4, 5 mL) and stirred at rt for 45 min. The solution was washed with aqueous HCl (5%, 4 x 10 mL), dried with anhydrous Na<sub>2</sub>SO<sub>4</sub>, filtered and concentrated to dryness to give Boc-[*D*-Leu-*L*-<sup>Me</sup>N-Ahf(Bn)-*D*-Leu-*L*-<sup>Me</sup>N-Ach]<sub>2</sub>-OH, which was used without further purification. The resulting octapeptide was dissolved in a

mixture of TFA and CH<sub>2</sub>Cl<sub>2</sub> (1:1, 6 mL) and stirred at rt for 20 min. After removal of the solvent under reduced pressure, the residue was dried under high vacuum for 3 h and used without

further purification. The resulting unprotected linear peptide (**op4**) was dissolved in dry CH<sub>2</sub>Cl<sub>2</sub> (268 mL) and successively treated with DIEA (280 μL, 1.6 mmol) and *N*-TBTU (112 mg, 0.29 mmol). After 12 h, the solvent was removed under reduced pressure and the residue was dissolved in CH<sub>2</sub>Cl<sub>2</sub> (25 mL), washed with aqueous HCl (10%, 2 x 20 mL), dried with anhydrous Na<sub>2</sub>SO<sub>4</sub>, filtered and concentrated to dryness. The crude was purified by flash chromatography (0-6% MeOH/CH<sub>2</sub>Cl<sub>2</sub>) to give 200 mg of **CP3**. [White solid, 62%, R<sub>f</sub> = 0.37 (5% MeOH/CH<sub>2</sub>Cl<sub>2</sub>)]. **<sup>1</sup>H NMR** (16 mM, CDCl<sub>3</sub>, 500 MHz, δ): 9.08 (d, *J* = 9.4 Hz, 1.33H, NH<sub>Leu1-D3E</sub>), 8.79 (d, *J* = 9.4 Hz, 0.66H, NH<sub>Leu1-D3A</sub>), 8.08 (d, *J* = 9.2 Hz, 1.33H, NH<sub>Leu2-D3E</sub>), 8.03 (d, *J* = 9.6 Hz, 0.66H, NH<sub>Leu2-D3A</sub>), 6.96 (br, 4.66H, Bn), 6.68 (br, 4H, Bn), 6.58 (m, 1.33H, Bn), 5.53 (m, 1.33H, H<sub>γ</sub><sub>Ahf-D3E</sub>), 5.45 (m, 0.66H, H<sub>γ</sub><sub>Ahf-D3A</sub>), 5.29 (m, 2H, H<sub>α</sub><sub>Leu1</sub>), 5.21 (d, *J* = 5.4 Hz, 0.66H, H<sub>α</sub><sub>Ahf-D3A</sub>), 5.13 (m, 2H, H<sub>α</sub><sub>Leu2</sub>), 4.78 (d, *J* = 8.3 Hz, 1.33H, H<sub>α</sub><sub>Ahf-D3E</sub>), 4.53 (m, 1.33H, H<sub>γ</sub><sub>Ach-D3E</sub>), 4.37 (m, 1.33H, H<sub>β</sub><sub>Ahf-D3A</sub> + H<sub>δ</sub><sub>Ahf-D3A</sub>), 4.22 (dd, *J*<sub>1</sub> = 10.2 Hz, *J*<sub>2</sub> = 8.8 Hz, 1.33H, H<sub>β</sub><sub>Ahf-D3E</sub>), 4.06 (m, 2.66H, H<sub>δ</sub><sub>Ahf-D3E</sub> + H<sub>γ</sub><sub>Ach-D3A</sub> + H<sub>δ</sub><sub>Ahf-D3A</sub>), 3.96 (br, 2.66H, H<sub>β</sub><sub>Bn-D3E</sub>), 3.73 (dd, *J*<sub>1</sub> = 10.7 Hz, *J*<sub>2</sub> = 9.3 Hz, 1.33H, H<sub>δ</sub><sub>Ahf-D3E</sub>), 3.66 (AB, *J* = 9.9 Hz, 0.66H, H<sub>β</sub><sub>Bn-D3A</sub>), 3.60 (AB, *J* = 9.8 Hz, 0.66H, H<sub>β</sub><sub>Bn-D3A</sub>), 3.33 (s, 2H, NMe<sub>Ahf-D3A</sub>), 3.04 (s, 4H, NMe<sub>Ach-D3E</sub>), 2.80 (m, 1.33H, H<sub>α</sub><sub>Ach-D3E</sub>), 2.67 (s, 2H, NMe<sub>Ach-D3A</sub>), 2.62 (s, 4H, NMe<sub>Ahf-D3E</sub>), 2.31 (m, 0.66H, H<sub>α</sub><sub>Ach-D3A</sub>), 1.91-1.05 (m, 27.33H, CH<sub>2</sub><sub>Ach</sub> + CH<sub>2</sub><sub>Leu</sub> + CH<sub>Leu</sub>), 1.04-0.80 (m, 24H, CH<sub>3</sub><sub>Leu</sub>), -1.20 (d, *J* = 11.5 Hz, 0.66H, H<sub>β</sub><sub>Ach-D3A</sub>). **<sup>13</sup>C NMR** (CDCl<sub>3</sub>, 75.4 MHz, δ): 175.2 (CO), 175.0 (CO), 174.4 (CO), 173.8 (CO), 172.4 (CO), 171.8 (CO), 171.4 (CO), 169.5 (CO), 136.8 (C), 136.0 (C), 128.7 (CH), 128.4 (CH), 128.1 (CH), 127.3 (CH), 127.0 (CH), 82.8 (CH), 82.3 (CH), 79.9 (CH), 77.1 (CH), 72.2 (CH<sub>2</sub>), 71.8 (CH<sub>2</sub>), 67.9 (CH<sub>2</sub>), 66.2 (CH<sub>2</sub>), 59.6 (CH), 57.7 (CH), 51.5 (CH), 51.1 (CH), 47.0 (CH), 46.6 (CH), 46.5 (CH), 43.9 (CH<sub>2</sub>), 43.5 (CH<sub>2</sub>), 31.4 (CH), 30.7 (CH<sub>2</sub>), 30.1 (CH<sub>2</sub>), 29.8 (CH), 29.3 (CH), 29.0 (CH), 28.7 (CH<sub>2</sub>), 25.4 (CH<sub>2</sub>), 25.0 (CH<sub>2</sub>), 24.7 (CH<sub>3</sub>), 24.6 (CH<sub>3</sub>), 24.5 (CH<sub>3</sub>), 23.7 (CH<sub>3</sub>), 23.4 (CH<sub>3</sub>), 23.2 (CH<sub>3</sub>), 22.5 (CH), 22.1 (CH<sub>3</sub>), 21.7 (CH<sub>3</sub>). **FTIR** (298 K, CHCl<sub>3</sub>): 3307 (amide A), 3066, 2954, 2925, 2866, 1678 (amide II), 1626 (amide I), 1526 cm<sup>-1</sup> (amide II). **MS (ESI)** [*m/z*(%)]: 1219.7 ([MNa]<sup>+</sup>, 10), 1197.7 ([MH]<sup>+</sup>, 100), 945.6 (30), 683.6 (60), 599.4 ([MH]<sup>2+</sup>, 9). **HRMS (ESI) calculated** for C<sub>66</sub>H<sub>101</sub>N<sub>8</sub>O<sub>12</sub>: 1197.7533, **found**: 1197.7556.

### X-Ray Crystallographic Determination of D3<sub>A</sub>

**Preparation of single crystals for X-Ray analysis:** In a typical experiment, 1.0 mg of pure **CP3** was dissolved in 900 μL of CHCl<sub>3</sub>, and equilibrated by vapour-phase diffusion against 3.0 mL of hexanes. The corresponding dimer crystallized spontaneously after 7 days.

**X-Ray Crystallographic Analysis:** Data were collected at 100 K, using Bruker X8 APEXII CCD diffractometer. All calculations were performed on a PC compatible computer using the programs: SORTAV (Blessing, 1995), SHELXT-2014 (Sheldrick, 2014), SHELXL204/7 (Sheldrick,

2014), ORTEP-3 (Farrugia, 2012), WinGX (Farrugia, 2012). Supplementary crystallographic data for D3<sub>A</sub> (CIF format) can be obtained free of charge from the journal.

The crystal structure was deposited at the Cambridge Crystallographic Data Centre, and the data was assigned to the following deposition number: CCDC 1400134.

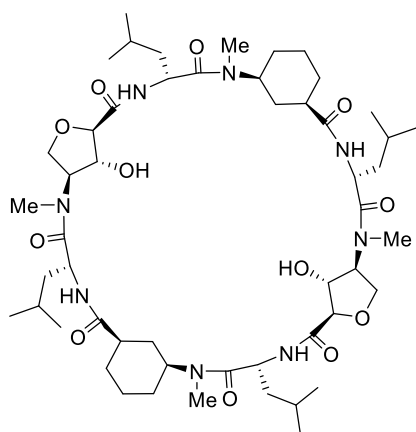

**c-{{[L-MeN-Ahf-D-Leu<sup>1</sup>-L-MeN-Ach-D-Leu<sup>2</sup>]-}}<sub>2</sub> (CP4):** A solution of **CP3** (50 mg, 0.042 mmol) and Pd/C (36 mg, 10% in wt) in a mixture of MeOH and CH<sub>2</sub>Cl<sub>2</sub> (3:1, 20 mL) was stirred at rt for 20 h under hydrogen atmosphere (balloon pressure). The resulting mixture was filtered through a Celite pad, the residue was washed with CH<sub>2</sub>Cl<sub>2</sub>, and the combined filtrates and washes were concentrated under reduced pressure. The crude was purified by HPLC (Phenomenex Luna 5μ silica, 6-13% MeOH/CH<sub>2</sub>Cl<sub>2</sub>, 30 min)

to give 30 mg of the cyclic peptide **CP4**. [White solid, 71%, *t<sub>R</sub>* = 22 min]. <sup>1</sup>H NMR (5 mM, CDCl<sub>3</sub>, 298 K, 300 MHz, δ): 7.92 (br, 2H), 5.31 (br, 2H), 5.08 (m, 4H), 4.47 (m, 6H), 4.23 (br, 2H), 3.83 (dd, *J*<sub>1</sub> = 10.7 Hz, *J*<sub>2</sub> = 9.0 Hz, 2H), 3.08 (s, 6H), 3.03 (s, 6H), 2.79 (m, 2H), 2.01-1.10 (m, 28H), 1.03-0.80 (m, 24H). <sup>1</sup>H NMR (32 mM, CDCl<sub>3</sub>, 253 K, 500 MHz, δ): 8.72 (d, *J* = 9.1 Hz, 0.8H, NH<sub>Leu1</sub>), 8.47 (d, *J* = 9.1 Hz, 1.2H, NH<sub>Leu1-D4A</sub>), 7.95 (d, *J* = 8.6 Hz, 0.8H, NH<sub>Leu2</sub>), 7.72 (d, *J* = 9.4 Hz, 1.2H, NH<sub>Leu2-D4A</sub>), 5.97 (br, 0.8H, OH), 5.48 (br, 1.2H, OH), 5.32 (m, 2H, H<sub>γ</sub>Ahf), 5.09 (m, 4H, H<sub>α</sub>Leu), 4.76 (br, 1H, H<sub>α</sub>Ahf-D4A), 4.45 (m, 5H, H<sub>γ</sub>Ach + H<sub>β</sub>Ahf + H<sub>α</sub>Ahf), 3.98 (m, 4H, H<sub>δ</sub>Ahf), 3.13 (s, 2H, NMe), 3.07 (s, 7H, NMe<sub>Ahf</sub> + H<sub>α</sub>Ach), 2.98 (s, 4H, NMe<sub>Ach</sub>), 2.62 (m, 1H, H<sub>α</sub>Ach), 2.07-1.14 (m, 28H, CH<sub>2</sub> Ach + CH<sub>2</sub> Leu + CH<sub>Leu</sub>), 1.07-0.68 (m, 24H, CH<sub>3</sub> Leu). <sup>1</sup>H NMR (32 mM, 5% CD<sub>3</sub>OH/CDCl<sub>3</sub>, 253 K, 500 MHz, δ): 8.83 (d, *J* = 9.3 Hz, 0.2H, NH<sub>Leu1</sub>), 8.64 (d, *J* = 8.9 Hz, 1.8H, NH<sub>Leu1-D4A</sub>), 8.15 (d, *J* = 9.5 Hz, 1.8H, NH<sub>Leu2-D4A</sub>), 7.94 (d, *J* = 8.0 Hz, 0.2H, NH<sub>Leu2</sub>), 6.11 (s, 1.8H, OH), 5.76 (s, 0.2H, OH), 5.31 (m, 2H, H<sub>γ</sub>Ahf), 5.13 (m, 4H, H<sub>α</sub>Leu), 4.62 (d, *J* = 7.9 Hz, 2H, H<sub>α</sub>Ahf), 4.57 (m, 2H, H<sub>γ</sub>Ach), 4.31 (dd, *J*<sub>1</sub> = 9.7 Hz, *J*<sub>2</sub> = 8.7 Hz, 2H, H<sub>β</sub>Ahf), 4.05 (m, 0.2H, H<sub>δ</sub>Ahf), 3.96 (d, *J* = 9.6 Hz, 3.6H, H<sub>δ</sub>Ahf-D4A), 3.84 (m, 0.2H, H<sub>δ</sub>Ahf), 3.37 (s, CH<sub>3</sub>OH), 3.09 (s, 5.4H, NMe<sub>Ahf-D4A</sub>), 3.06 (s, 0.6H, NMe<sub>Ahf</sub>), 2.93 (s, 6H, NMe<sub>Ach</sub>), 2.78 (m, 2H, H<sub>α</sub>Ach), 1.97-1.15 (m, 28H, CH<sub>2</sub> Ach + CH<sub>2</sub> Leu + CH<sub>Leu</sub>), 0.98 (d, *J* = 6.3 Hz, 4H, CH<sub>3</sub> Leu), 0.87 (dd, *J*<sub>1</sub> = 8.1 Hz, *J*<sub>2</sub> = 6.8 Hz, 16H, CH<sub>3</sub> Leu), 0.82 (d, *J* = 6.9 Hz, 4H, CH<sub>3</sub> Leu). FTIR (298 K, CHCl<sub>3</sub>): 3437, 3298 (amide A), 2955, 2931, 2867, 1676 (amide II), 1621 (amide I), 1537 cm<sup>-1</sup> (amide II). MS (ESI) [m/z(%): 1017.6 ([MH]<sup>+</sup>, 16), 536.8 (32), 528.3 ([MK]<sup>2+</sup>, 21), 509.3 ([MH]<sup>2+</sup>, 9), 381.3 (100). HRMS (ESI) calculated for C<sub>52</sub>H<sub>89</sub>N<sub>8</sub>O<sub>12</sub>: 1017.6594, found: 1017.6556.

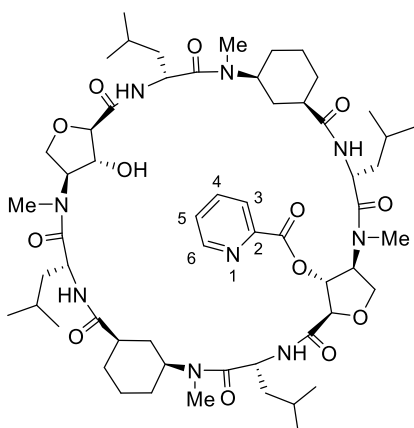

**c-[L-MeN-Ahf(pic)-D-Leu<sup>1</sup>-L-MeN-Ach<sup>1</sup>-D-Leu<sup>2</sup>-L-MeN-Ahf-D-Leu<sup>3</sup>-L-MeN-Ach<sup>2</sup>-D-Leu<sup>4</sup>]- (CP5):** A solution of CP4 (5.5 mg, 5.4  $\mu\text{mol}$ ) in  $\text{CH}_2\text{Cl}_2$  (1 mL) was treated with 2-picolinic acid (0.73 mg, 5.9  $\mu\text{mol}$ ), EDC·HCl (1.1 mg, 5.9  $\mu\text{mol}$ ), HOBt (0.79 mg, 5.9  $\mu\text{mol}$ ) and DMAP (0.72 mg, 5.9  $\mu\text{mol}$ ). Each 12 h, additional 2-picolinic acid (1.5 mg, 11.8  $\mu\text{mol}$ ), EDC (2.2 mg, 11.8  $\mu\text{mol}$ ) and DMAP (1.4 mg, 11.8  $\mu\text{mol}$ ) was added during 3-4 days. Then, the solution was washed with aqueous saturated  $\text{NaHCO}_3$  (2 x 5 mL) and aqueous

HCl (5%, 2 x 5 mL). The organic layer was dried with anhydrous  $\text{Na}_2\text{SO}_4$ , filtered and concentrated to dryness. The crude was purified by HPLC (Phenomenex Luna 5 $\mu$  silica, 7-11% MeOH/ $\text{CH}_2\text{Cl}_2$ , 30 min) to give 3.2 mg of the cyclic peptide CP5. [White solid, 54%,  $t_R$  = 20 min]. **<sup>1</sup>H NMR** ( $\text{CDCl}_3$ , 300 MHz,  $\delta$ ): 8.80-8.15 (m, 3H), 7.99-7.56 (m, 3H), 7.43 (m, 1H), 7.11 (m, 0.5H), 6.72 (m, 0.5H), 6.06-3.67 (m, 17H), 3.35 (s, 1.5H), 3.21 (s, 1H), 3.20 (s, 2H), 3.17 (s, 1H), 3.13 (s, 1H), 3.01 (s, 4H), 2.84 (s, 1.5H), 2.37 (m, 2H), 2.12-0.54 (m, 52H). **FTIR** (298 K,  $\text{CHCl}_3$ ): 3298 (amide A), 3068, 3003, 2956, 2929, 2868, 1747 (C=O), 1683 (amide I<sub>II</sub>), 1623 (amide I), 1540  $\text{cm}^{-1}$  (amide II). **MS (ESI)** [ $m/z$ (%)]: 1144.7 ([MNa]<sup>+</sup>, 23), 1122.7 ([MH]<sup>+</sup>, 32), 572.8 ([MNa]<sup>2+</sup>, 8), 511.3 (34), 500.3 (100). **HRMS (ESI) calculated** for  $\text{C}_{58}\text{H}_{92}\text{N}_9\text{O}_{13}$ : 1122.6809, **found**: 1122.6807.

#### ADDITION EXPERIMENT OF $\text{AgBF}_4$ :

CP5 (2.2 mg, 1.9  $\mu\text{mol}$ ) was dissolved in  $\text{CDCl}_3$  (400  $\mu\text{L}$ ) in a NMR tube. In a flask under Ar and protected from light,  $\text{AgBF}_4$  (15.8 mg, 0.081 mmol) (dry box) was dissolved in  $\text{CD}_3\text{CN}$  (2.0 mL). Then, different portions (0.1, 0.2, 0.3, 0.4 and 0.5 equiv) of the solution of  $\text{AgBF}_4$  (24  $\mu\text{L}$ , 0.95  $\mu\text{mol}$ ) were added to the NMR tube to form mainly the complex  $s\text{-D5}_E\text{Ag}$ . **<sup>1</sup>H NMR** (4.5 mM,  $\text{CDCl}_3$ , 500 MHz,  $\delta$ ): 8.66 (d,  $J$  = 9.1 Hz, 0.25H,  $\text{NH}_{\text{minor}}$ ), 8.55 (d,  $J$  = 9.2 Hz, 1H,  $\text{NH}_{\text{Leu3(major)+minor}}$ ), 8.43 (d,  $J$  = 9.6 Hz, 0.75H,  $\text{NH}_{\text{Leu1(major)}}$ ), 7.99 (d,  $J$  = 9.1 Hz, 0.75H,  $\text{NH}_{\text{Leu4(major)}}$ ), 7.93 (d,  $J$  = 9.2 Hz, 0.75H,  $\text{NH}_{\text{Leu2(major)}}$ ), 7.87 (d,  $J$  = 4.3 Hz, 0.25H,  $\text{Pic}_{\text{minor}}$ ), 7.78 (s, 1H,  $\text{NH}_{\text{minor}} + \text{H6-Pic}_{\text{major}}$ ), 7.65 (d,  $J$  = 9.1 Hz, 0.25H,  $\text{NH}_{\text{minor}}$ ), 7.51 (m, 1H,  $\text{H3-Pic}_{\text{major}} + \text{Pic}_{\text{minor}}$ ), 7.23 (m, 0.25H,  $\text{Pic}_{\text{minor}}$ ), 7.10 (m, 1.50H,  $\text{H4/H5-Pic}_{\text{major}}$ ), 6.93 (m, 0.25H,  $\text{Pic}_{\text{minor}}$ ), 5.82 (m, 1.50 H,  $\text{H}\gamma_{\text{Ahf(pic)}}$ ), 5.63 (dd,  $J_1$  = 9.7 Hz,  $J_2$  = 9.2 Hz, 0.75H,  $\text{H}\beta_{\text{Ahf(pic)}}$ ), 5.41 (m, 1H,  $\text{H}\gamma_{\text{Ahf}}$ ), 5.27 (m, 1.25H,  $\text{H}\alpha_{\text{Leu4}}$ ), 5.19 (m, 1.5H,  $\text{H}\alpha_{\text{Leu3}} + \text{H}\alpha_{\text{Ahf(pic)(minor)}}$ ), 5.12 (m, 1.25H,  $\text{H}\alpha_{\text{Leu2}}$ ), 5.07 (m, 1.5H,  $\text{H}\alpha_{\text{Leu1}}$ ), 4.93 (d,  $J$  = 9.0 Hz, 0.75H,  $\text{H}\alpha_{\text{Ahf(pic)}}$ ), 4.81 (br, 0.25H), 4.59 (d,  $J$  = 8.5 Hz, 1.50H,  $\text{H}\alpha_{\text{Ahf}}$ ), 4.40 (dd,  $J_1$  = 10.6 Hz,  $J_2$  = 8.9 Hz, 0.75H,  $\text{H}\beta_{\text{Ahf}}$ ), 4.33 (dd,  $J_1$  = 11.7 Hz,  $J_2$  = 9.6 Hz, 0.75H,  $\text{H}\delta_{\text{Ahf(pic)}}$ ), 4.27 (m, 0.75H,  $\text{H}\gamma_{\text{Ach2}}$ ), 4.12 (dd,  $J_1$  = 9.3 Hz,  $J_2$  = 8.8 Hz, 0.75H,  $\text{H}\delta_{\text{Ahf}}$ ), 4.02 (dd,  $J_1$  = 9.8 Hz,  $J_2$  = 8.3 Hz, 0.75H,  $\text{H}\delta_{\text{Ahf(pic)}}$ ), 3.97 (dd,  $J_1$  = 10.2 Hz,  $J_2$  = 9.7 Hz, 0.75H,  $\text{H}\delta_{\text{Ahf}}$ ), 3.92 (m, 0.75H,  $\text{H}\gamma_{\text{Ach1}}$ ), 3.82 (m, 0.5H), 3.28 (s, 2.25H,  $\text{NMe}_{\text{Ahf(pic)}}$ ), 3.16 (s,

0.75H, NMe), 3.14 (s, 0.75H, NMe), 3.13 (s, 2.25H, NMe<sub>Ahf</sub>), 3.06 (s, 2.25H, NMe<sub>Ach2</sub>), 2.96 (s, 0.75H), 2.94 (s, 0.75H), 2.82 (s, 2.25H, NMe<sub>Ach1</sub>), 2.57 (m, 0.75H, H $\alpha$ <sub>Ach2(major)</sub>), 2.48 (m, 0.25H, H $\alpha$ <sub>Ach(minor)</sub>), 2.35 (m, 0.75H, H $\alpha$ <sub>Ach1(major)</sub>), 2.26 (m, 0.25H, H $\alpha$ <sub>Ach(minor)</sub>), 2.02-1.17 (m, 27H, CH<sub>2</sub> Ach + CH<sub>2</sub> Leu + CH<sub>Leu</sub>), 1.04-0.77 (m, 24H, CH<sub>3</sub> Leu), 0.11 (d,  $J$  = 9.0 Hz, 0.75H, H $\beta$ <sub>Ach1(major)</sub>). **MS (ESI)** [m/z(%): 2957.6 (35), 2546.2 (Dimer+Ag+AgBF<sub>4</sub>, 71), 2352.3 (Dimer+Ag, 100), 2247.2 (Dimer, 28), 2057.3 (28), 1230.6 (CP+Ag, 19), 942.1 (17)]. **HRMS (ESI) calculated** for C<sub>116</sub>H<sub>182</sub>AgN<sub>18</sub>O<sub>16</sub>: 2350.2518, **found**: 2350.2604.

#### **ADDITION EXPERIMENT OF OXALIC ACID:**

**CP5** (2.5 mg, 2.3  $\mu$ mol) was dissolved in CDCl<sub>3</sub> (400  $\mu$ L) in a NMR tube. In another flask, (CO<sub>2</sub>H)<sub>2</sub> · 2H<sub>2</sub>O (7.9 mg, 0.063 mmol) was dissolved in CD<sub>3</sub>CN (1.0 mL). Then, different portions (0.1, 0.2, 0.3, 0.4 and 0.5 equiv) of the solution of (CO<sub>2</sub>H)<sub>2</sub> · 2H<sub>2</sub>O (17.8  $\mu$ L, 1.15  $\mu$ mol) were added to the NMR tube to form mainly the complex *s*-D5E $\rightarrow$ (CO<sub>2</sub>H)<sub>2</sub>. **<sup>1</sup>H NMR** (5mM, CDCl<sub>3</sub>, 500 MHz,  $\delta$ ): 8.65 (d,  $J$  = 9.2 Hz, 1H, NH<sub>Leu3</sub>), 8.47 (d,  $J$  = 9.5 Hz, 1H, NH<sub>Leu1</sub>), 8.15 (d,  $J$  = 9.4 Hz, 1H, NH<sub>Leu4</sub>), 7.96 (s, 1H, H6-Pic), 7.92 (d,  $J$  = 10.0 Hz, 1H, NH<sub>Leu2</sub>), 7.48 (br, 1H, H3-Pic), 7.18 (br, 2H, H4/H5-Pic), 5.82 (m, 1H, H $\gamma$ <sub>Ahf(pic)</sub>), 5.60 (dd,  $J_1$  = 10.3 Hz,  $J_2$  = 9.4 Hz, 1H, H $\beta$ <sub>Ahf(pic)</sub>), 5.46 (m, 1H, H $\gamma$ <sub>Ahf</sub>), 5.30 (m, 1H, H $\alpha$ <sub>Leu4</sub>), 5.23 (m, 1H, H $\alpha$ <sub>Leu3</sub>), 5.14 (m, 2H, H $\alpha$ <sub>Leu2</sub> + OH), 5.08 (m, 1H, H $\alpha$ <sub>Leu1</sub>), 4.92 (d,  $J$  = 9.1 Hz, 1H, H $\alpha$ <sub>Ahf(pic)</sub>), 4.71 (d,  $J$  = 8.5 Hz, 1H, H $\alpha$ <sub>Ahf</sub>), 4.49 (dd,  $J_1$  = 11.0 Hz,  $J_2$  = 8.7 Hz, 1H, H $\beta$ <sub>Ahf</sub>), 4.32 (m, 2H, H $\delta$ <sub>Ahf(pic)</sub> + H $\gamma$ <sub>Ach2</sub>), 4.14 (m,  $J_1$  = 11.5 Hz,  $J_2$  = 9.0 Hz, 1H, H $\delta$ <sub>Ahf</sub>), 4.02 (dd,  $J_1$  = 10.1 Hz,  $J_2$  = 8.9 Hz, 1H, H $\delta$ <sub>Ahf(pic)</sub>), 3.96 (dd,  $J_1$  = 11.1 Hz,  $J_2$  = 9.6 Hz, 1H, H $\delta$ <sub>Ahf</sub>), 3.92 (m, 1H, H $\gamma$ <sub>Ach1</sub>), 3.28 (s, 3H, NMe<sub>Ahf(pic)</sub>), 3.12 (s, 3H, NMe<sub>Ahf</sub>), 3.08 (s, 3H, NMe<sub>Ach2</sub>), 2.83 (s, 3H, NMe<sub>Ach1</sub>), 2.65 (m, 1H, H $\alpha$ <sub>Ach2</sub>), 2.40 (m, 1H, H $\alpha$ <sub>Ach1</sub>), 1.88-1.07 (m, 27H, CH<sub>2</sub> Ach + CH<sub>2</sub> Leu + CH<sub>Leu</sub>), 1.06-0.70 (m, 24H, CH<sub>3</sub> Leu), 0.15 (d,  $J$  = 11.8 Hz, 1H, H $\beta$ <sub>Ach1</sub>).

**NMR and FTIR Spectra:**

**Boc-D-Leu-L-Ahf(Bn)-OMe (3):**  $^1\text{H}$  NMR ( $\text{CDCl}_3$ , 298 K, 250 MHz), DEPT and  $^{13}\text{C}$  NMR ( $\text{CDCl}_3$ , 298 K, 75.4 MHz).

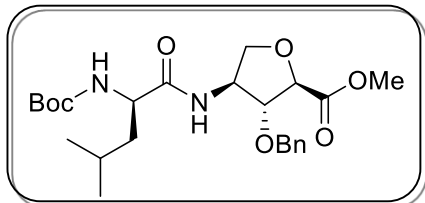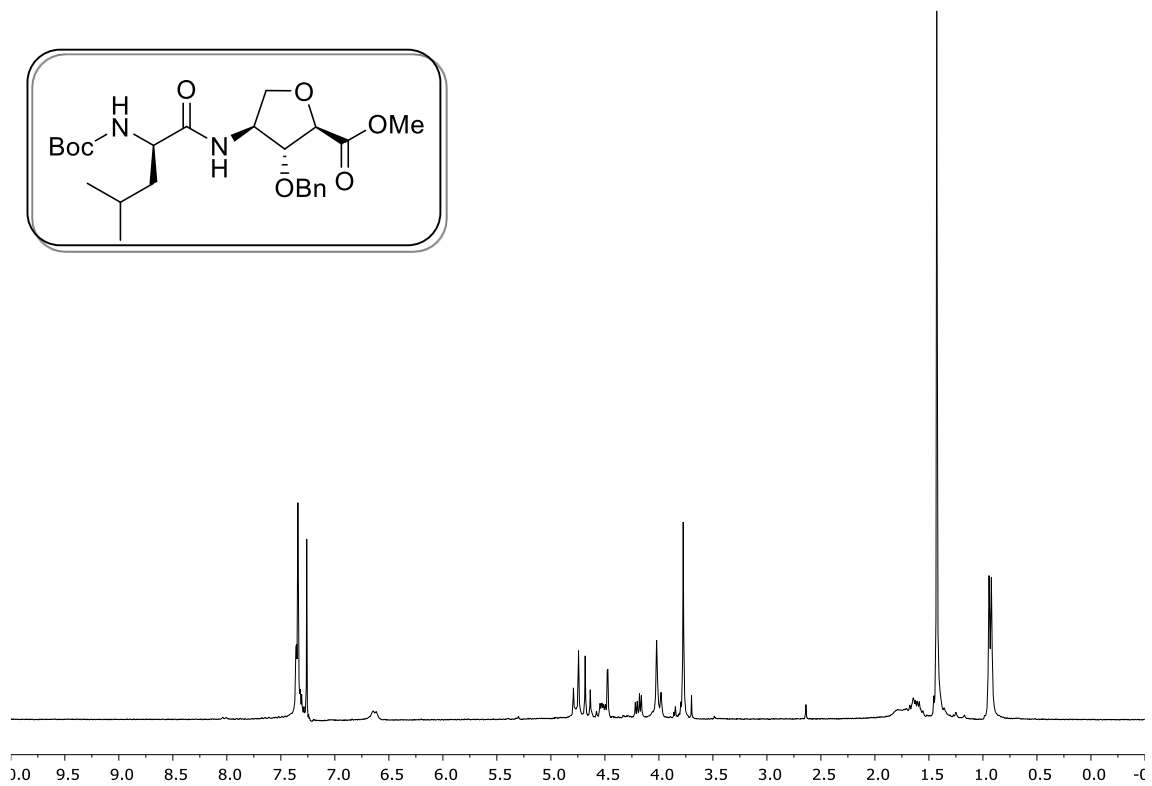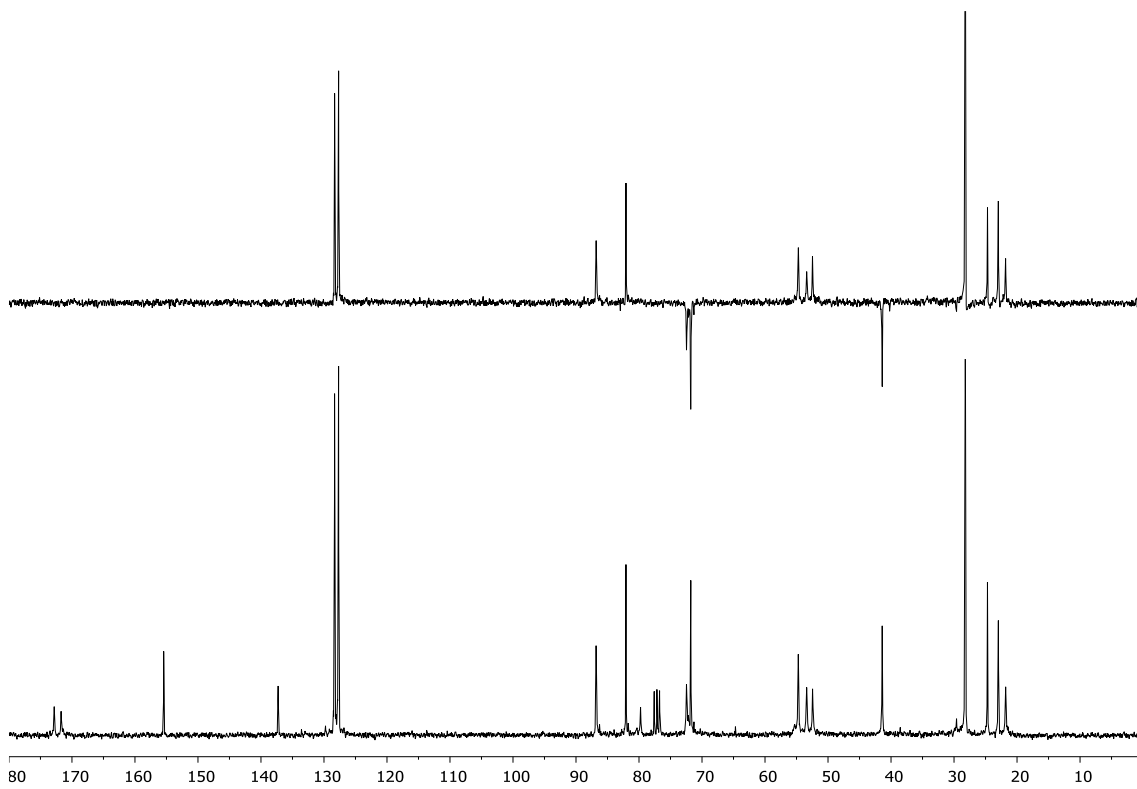

**Boc-D-Leu-L-Ahf(Bn)-OH (dp2):**  $^1\text{H}$  NMR ( $\text{CDCl}_3$ , 298 K, 300 MHz), DEPT and  $^{13}\text{C}$  NMR ( $\text{CDCl}_3$ , 298 K, 75.4 MHz).

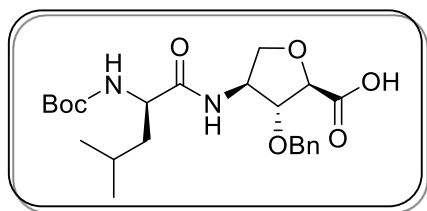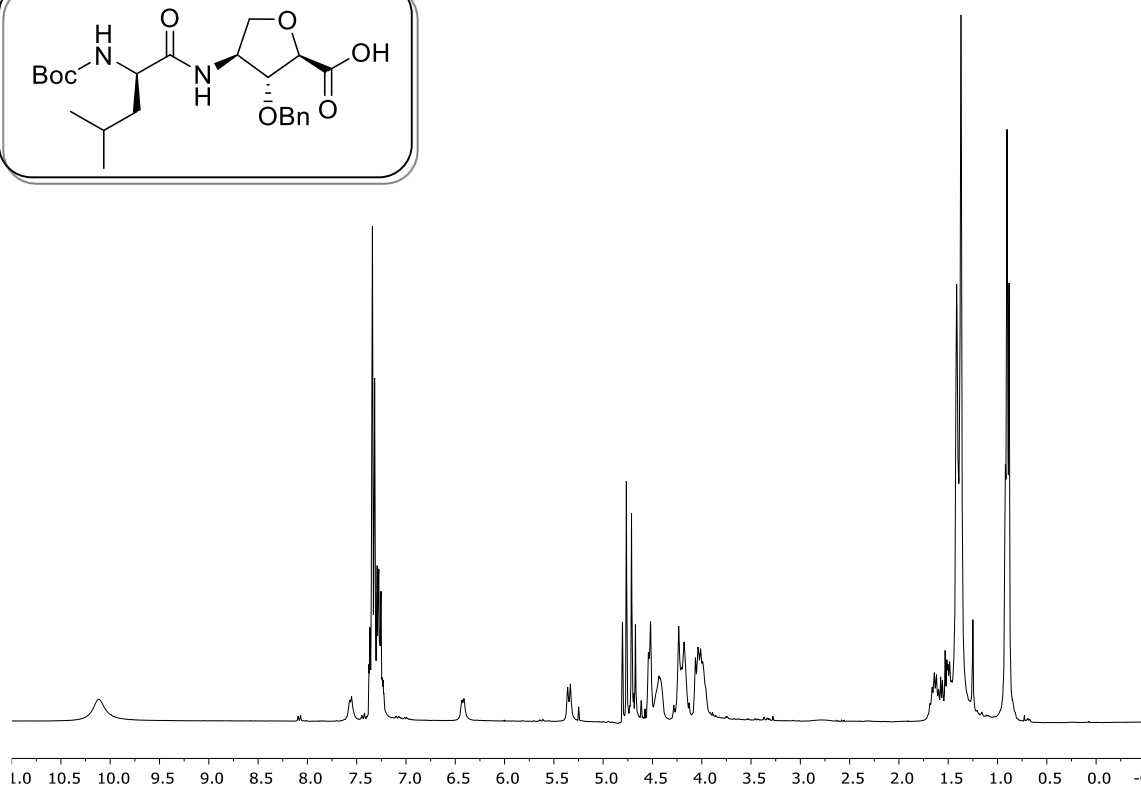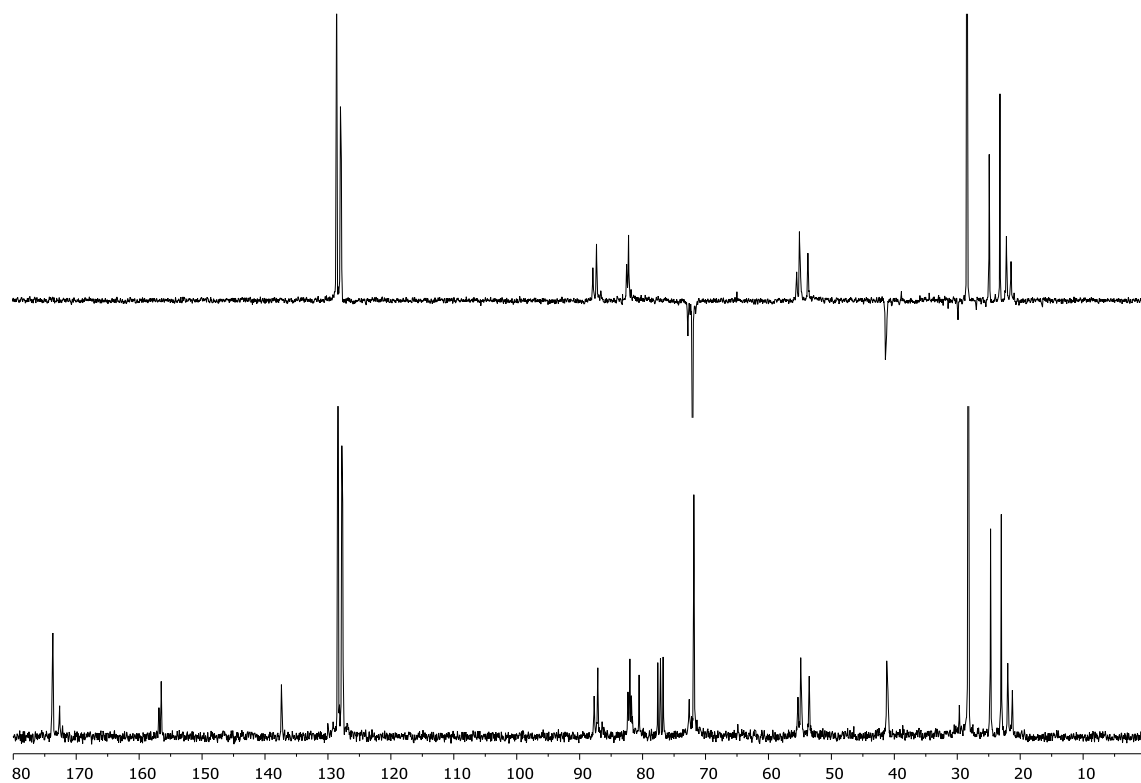



**Boc-D-Tyr(Me)-L-MeN-Ach-OFm (dp1):**  $^1\text{H}$  NMR ( $\text{CDCl}_3$ , 298 K, 300 MHz), DEPT and  $^{13}\text{C}$  NMR ( $\text{CDCl}_3$ , 298 K, 75.4 MHz).

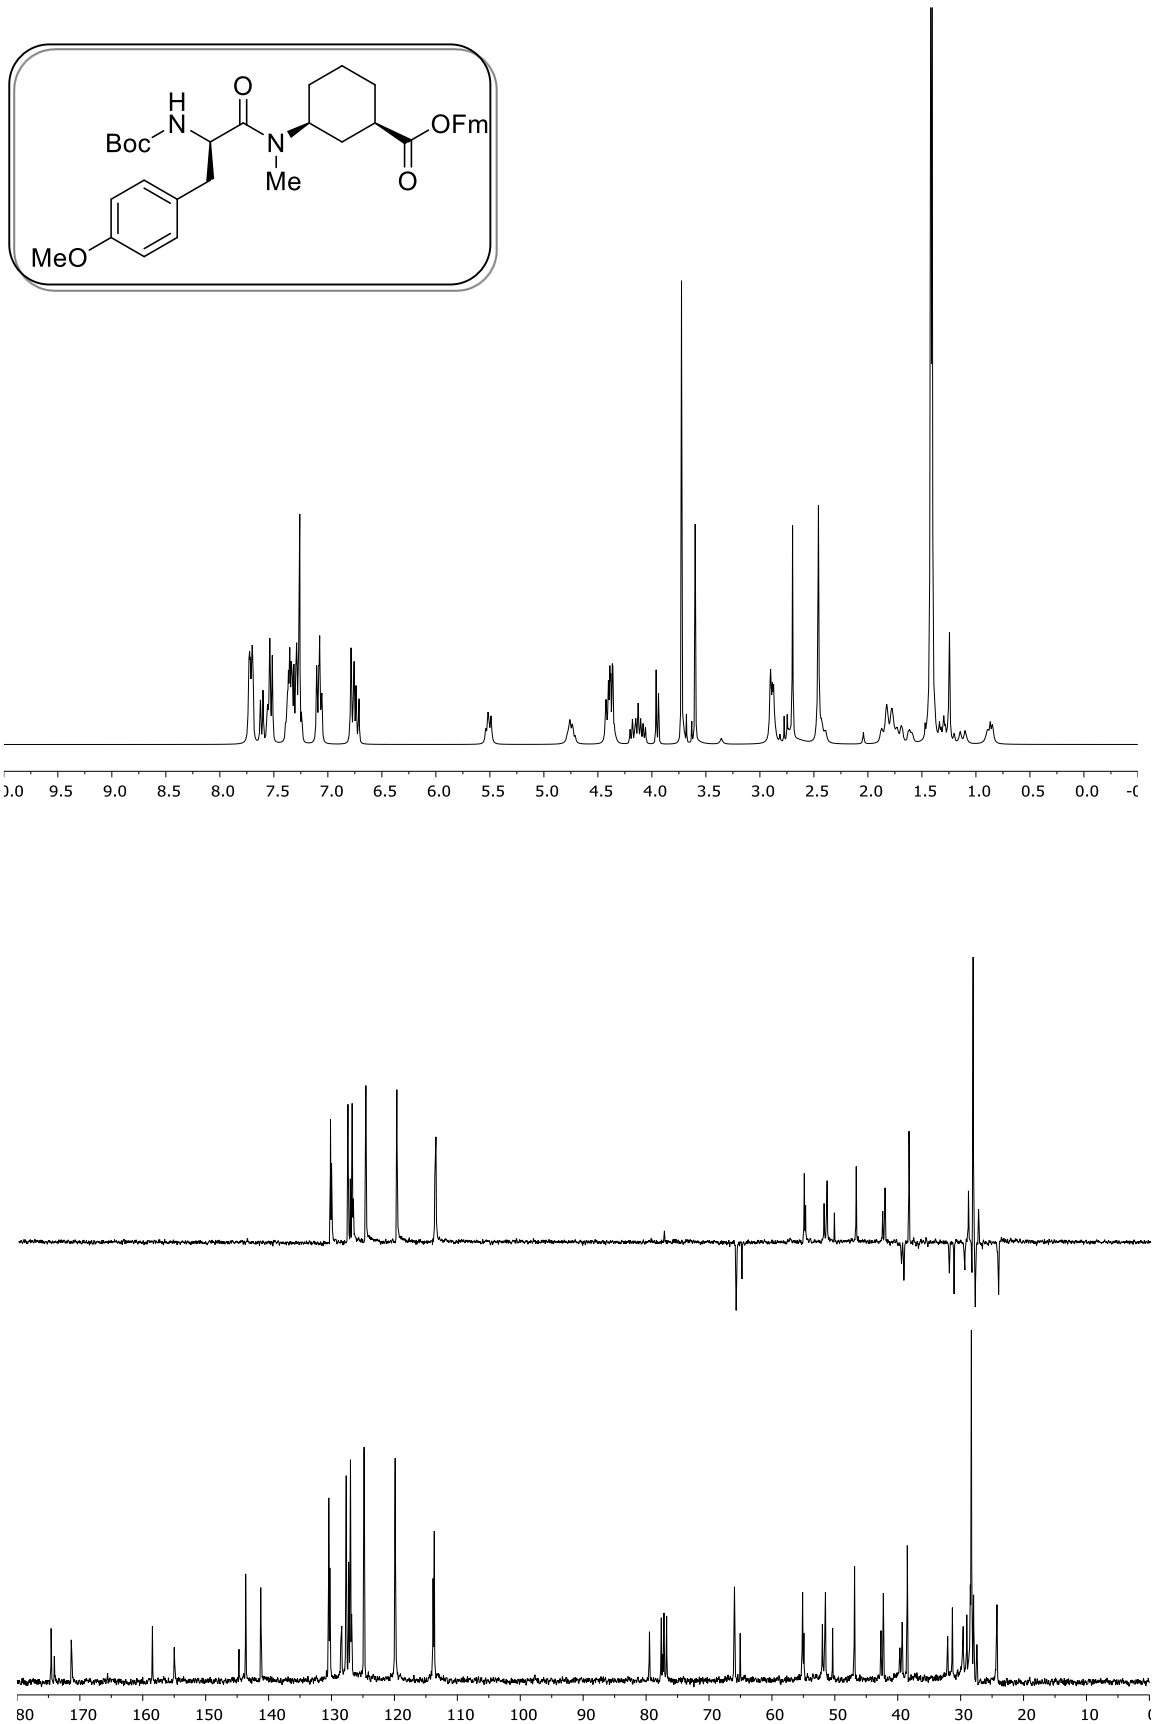

**c-{{L-Ahf(Bn)-D-Tyr(Me)-L<sup>Me</sup>N-Ach- D-Leu-}}<sub>2</sub>** (CP1): <sup>1</sup>H NMR (7.5 mM, CDCl<sub>3</sub>, 298 K, 300 MHz) and <sup>13</sup>C NMR (CDCl<sub>3</sub>, 298 K, 75.4 MHz).

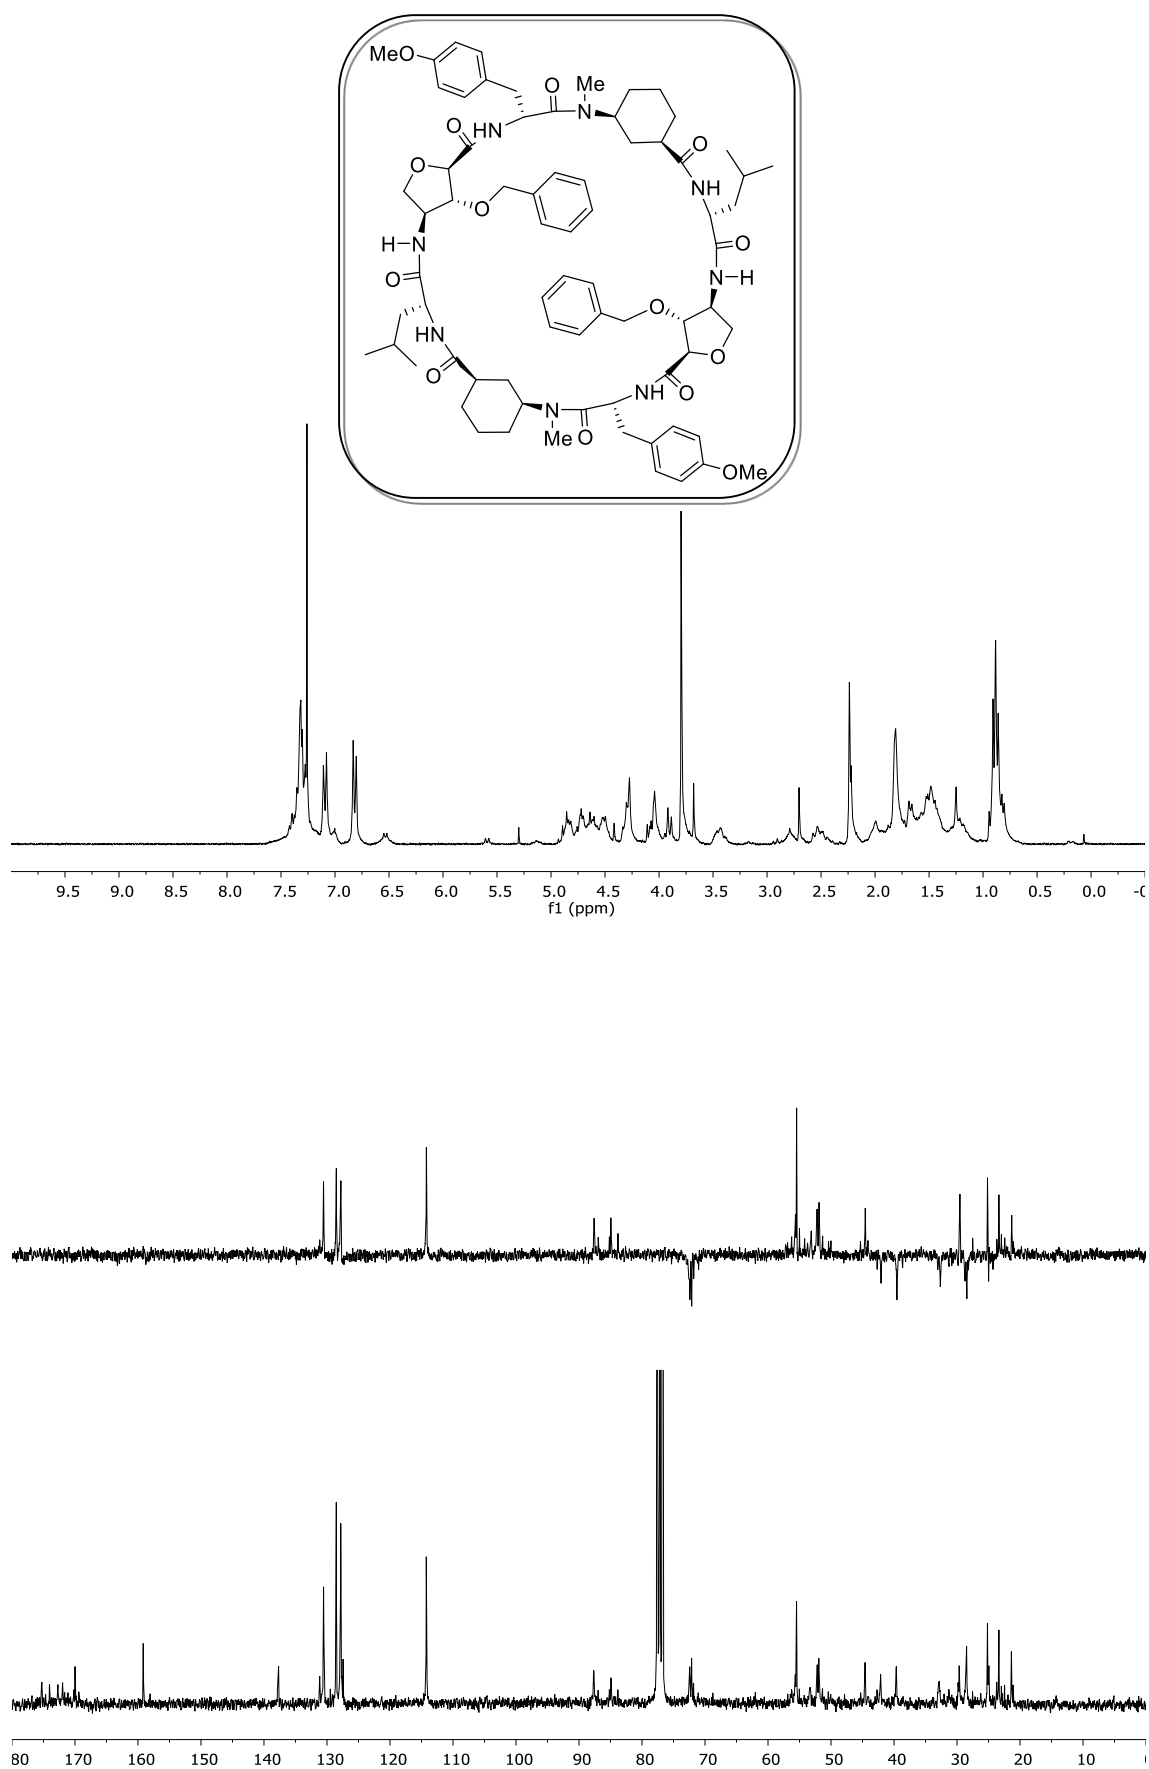

FTIR (298 K, CHCl<sub>3</sub>):

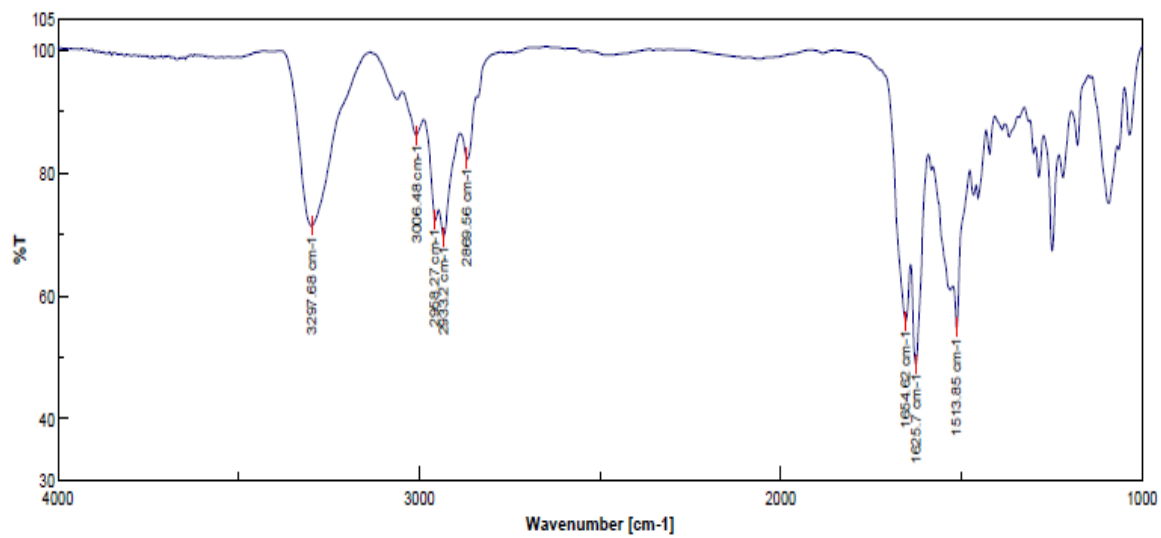

**c-{{[L-Ahf-D-Tyr(Me)-L-MeN-Ach-D-Leu-]2} (CP2):**  $^1\text{H}$  NMR (20 mM,  $\text{CDCl}_3$ , 298 K, 300 MHz), DEPT and  $^{13}\text{C}$  NMR ( $\text{CDCl}_3$ , 298 K, 75.4 MHz).

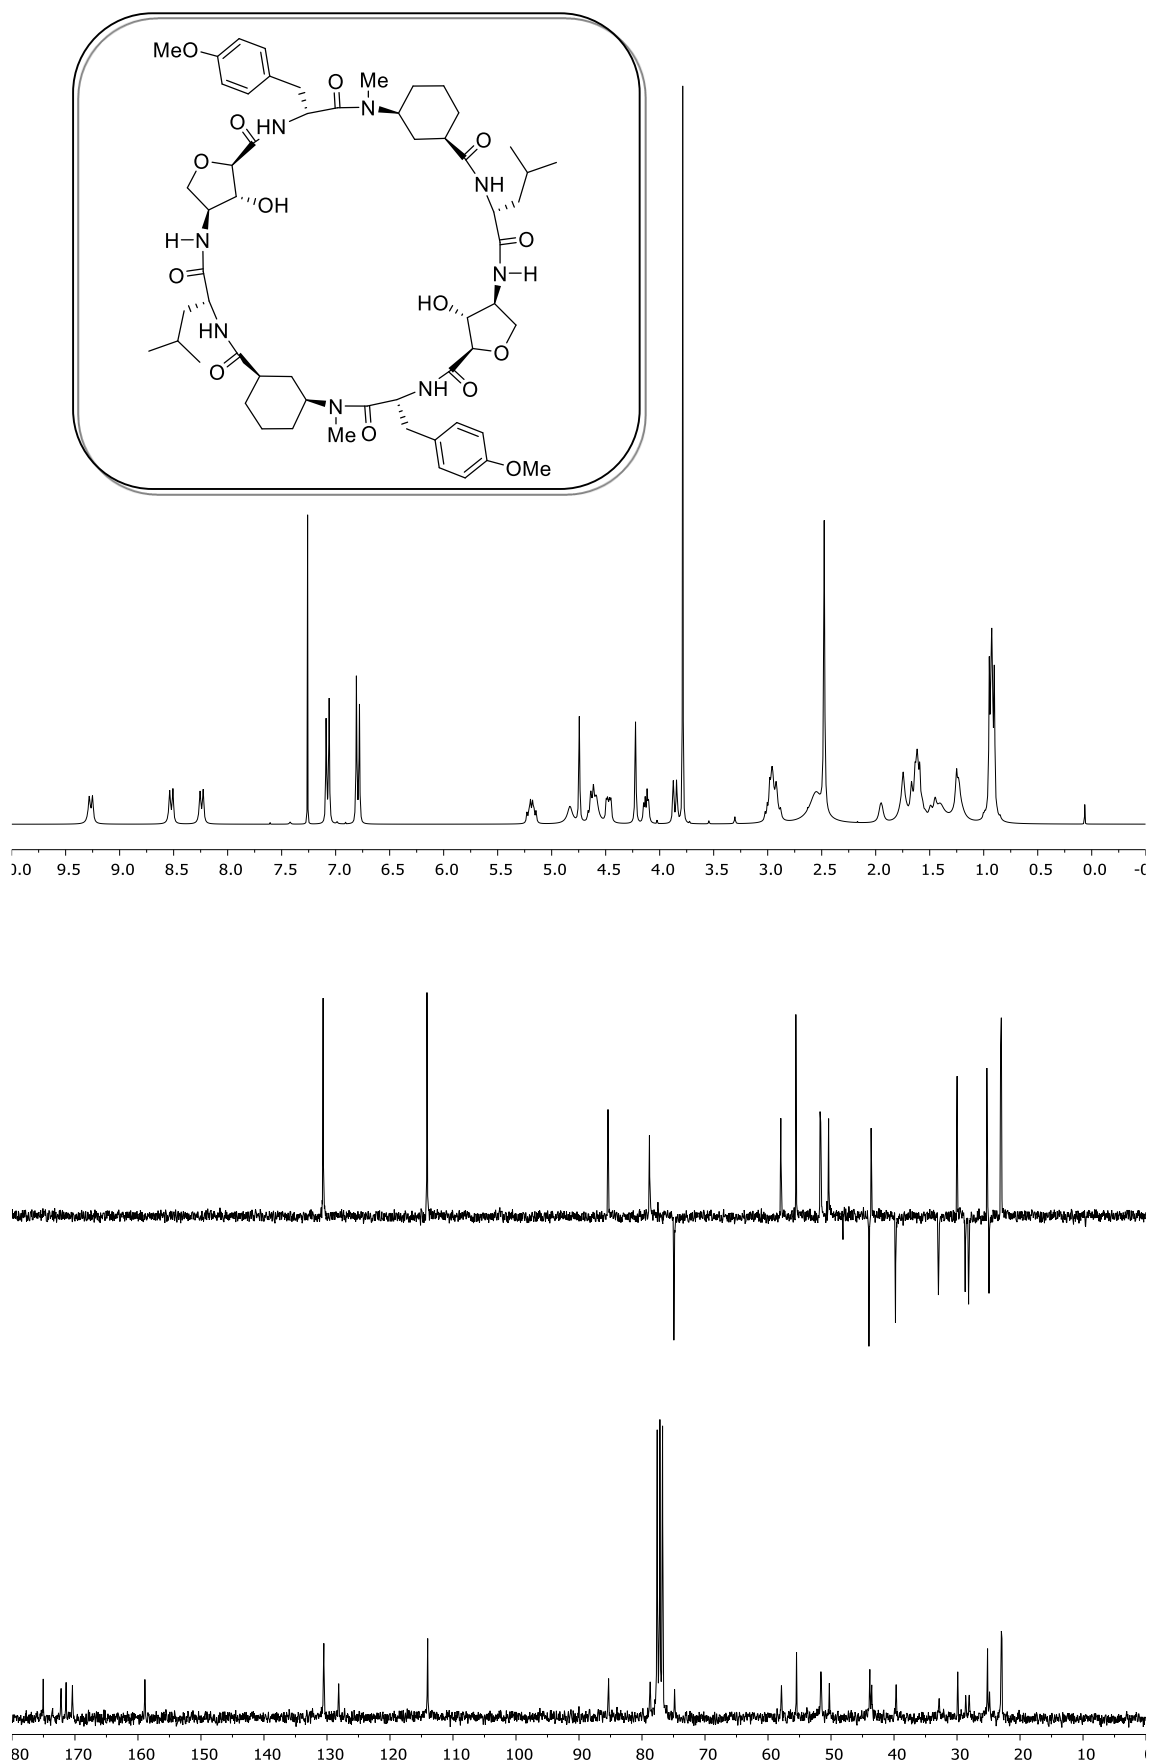

**COSY** (20 mM, CDCl<sub>3</sub>, 298 K, 500 MHz).

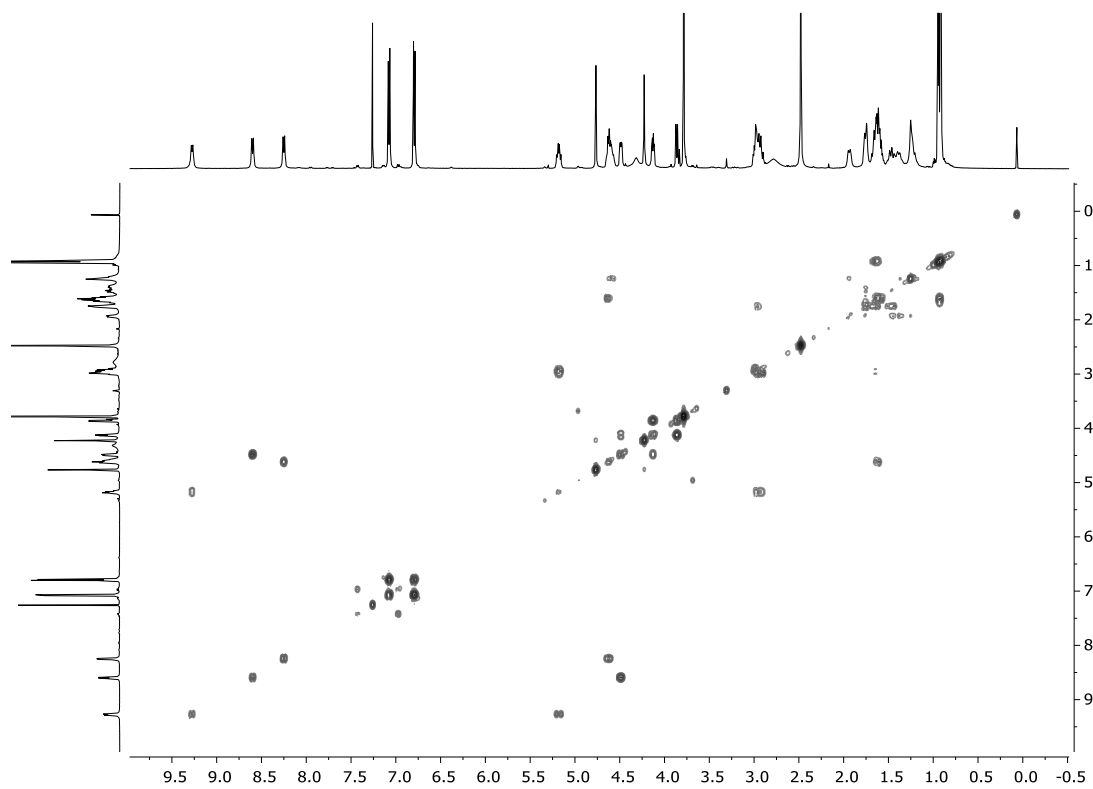

**TOCSY** (20 mM, CDCl<sub>3</sub>, 298 K, 500 MHz).

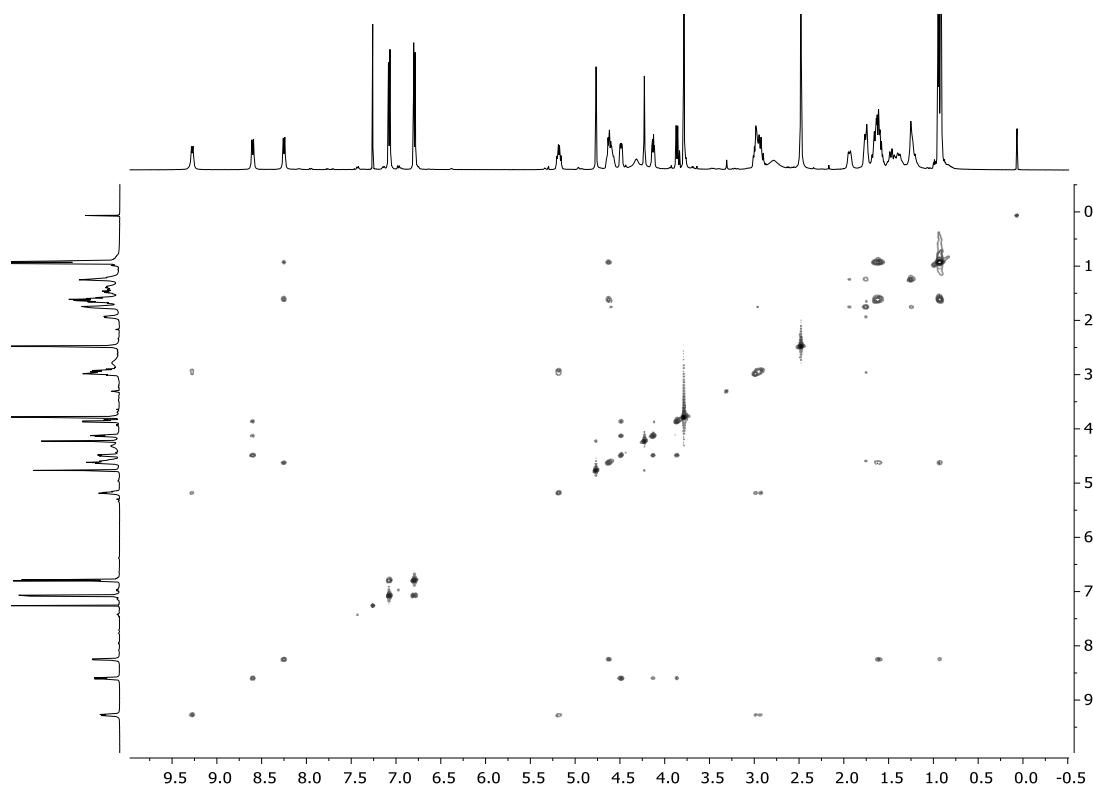

NOESY (20 mM, CDCl<sub>3</sub>, 298 K, 500 MHz).

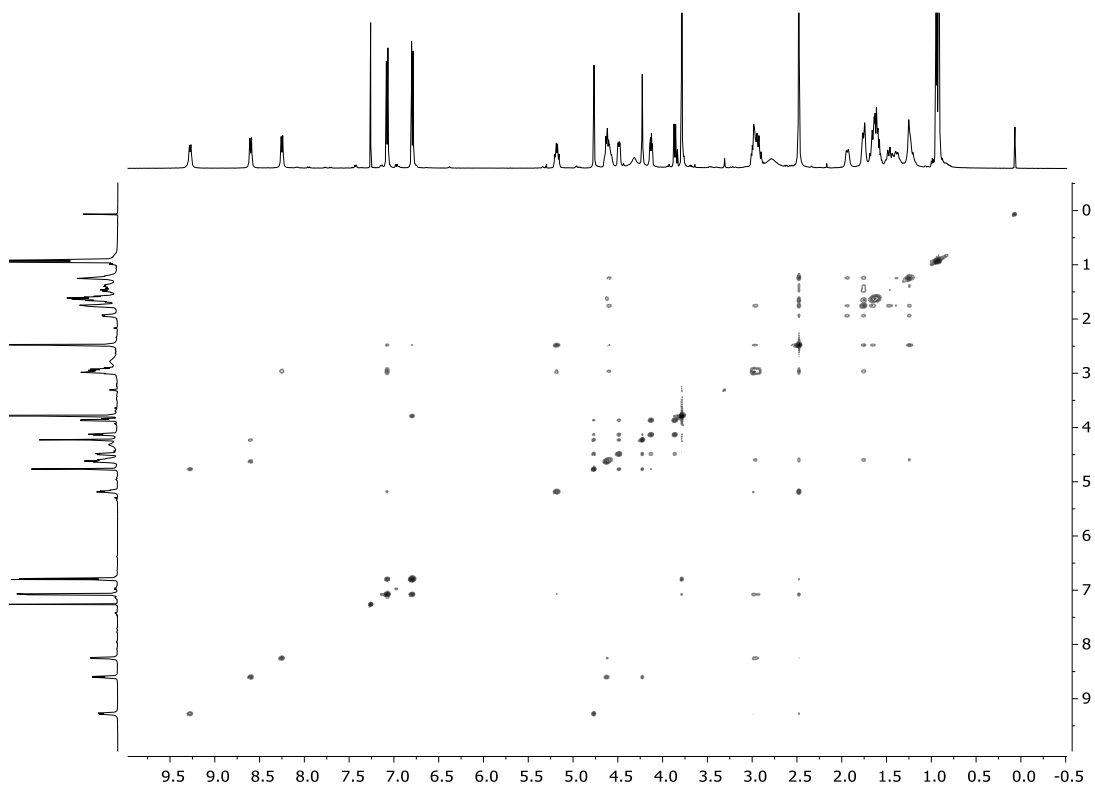

FTIR (298 K, CHCl<sub>3</sub>):

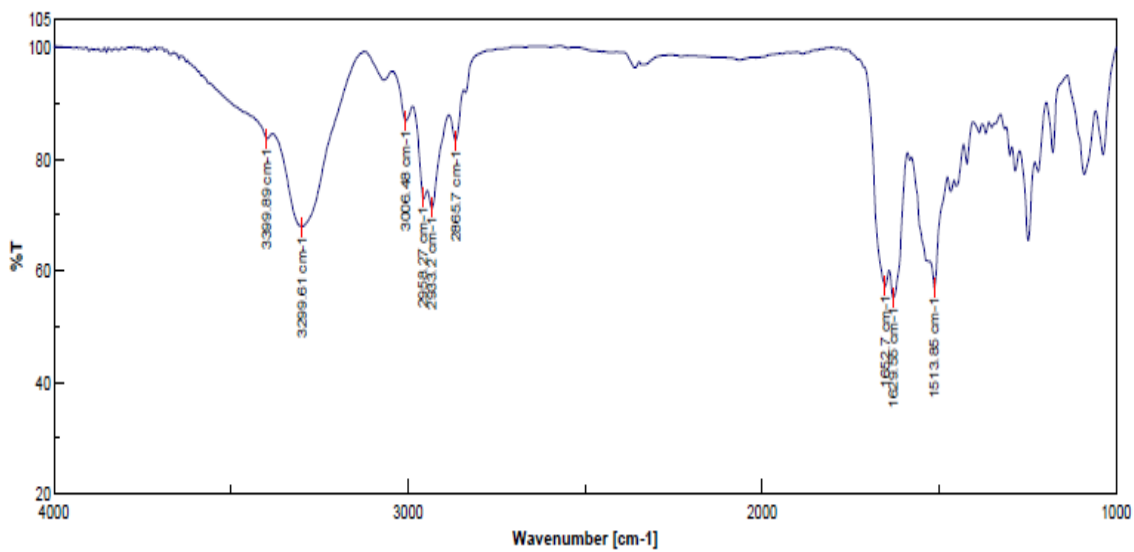

**Boc-D-Leu-L-Me<sup>e</sup>N-Ahf(Bn)-OMe (4):** <sup>1</sup>H NMR (CDCl<sub>3</sub>, 298 K, 300 MHz), DEPT and <sup>13</sup>C NMR (CDCl<sub>3</sub>, 298 K, 75.4 MHz).

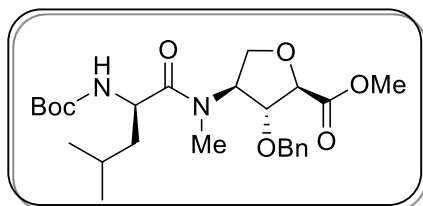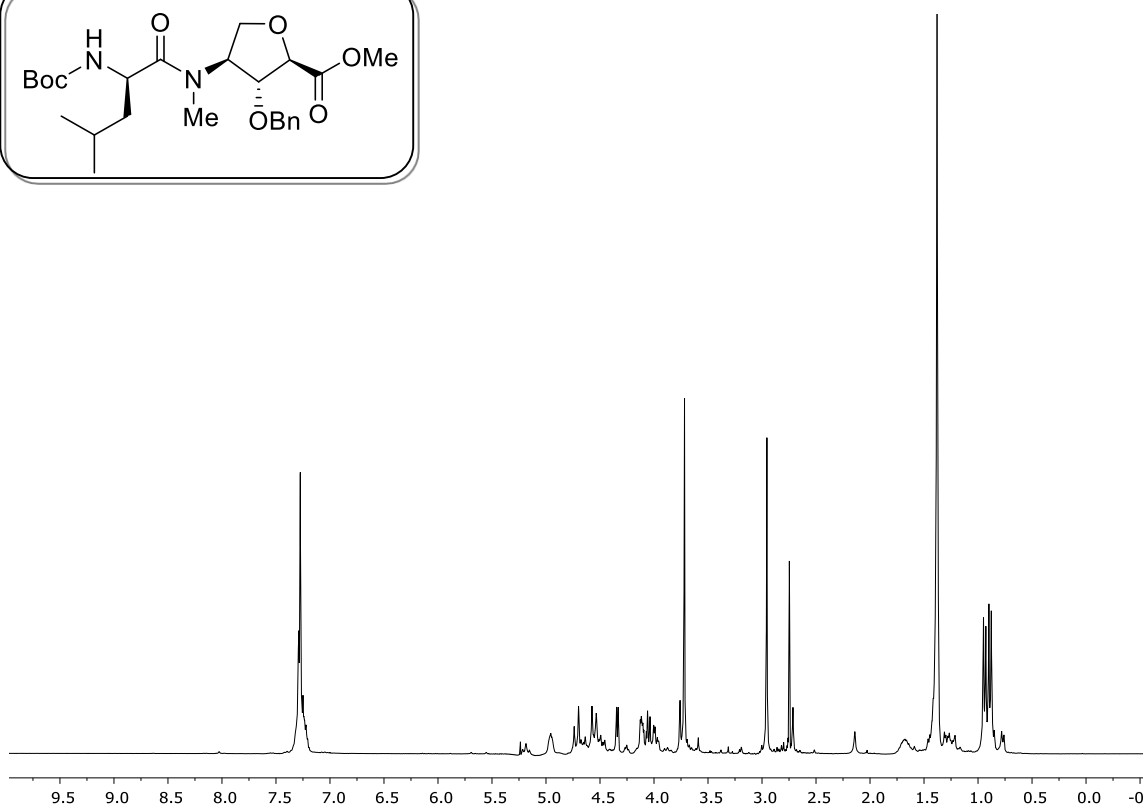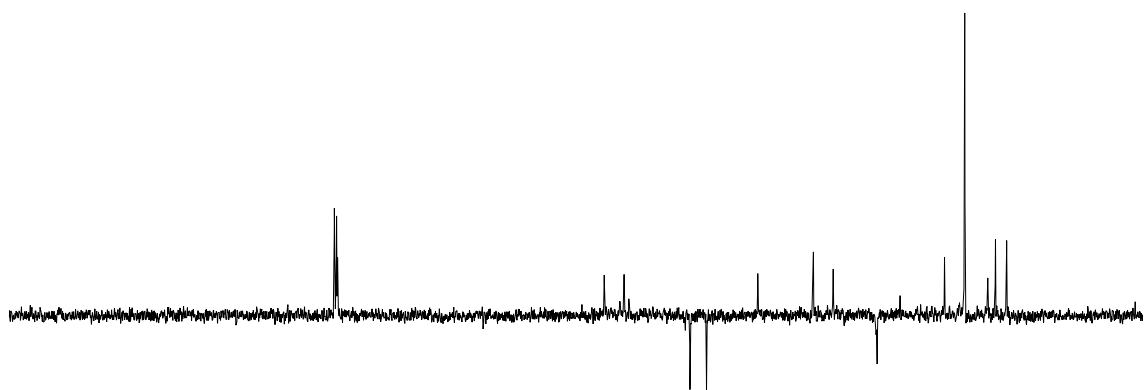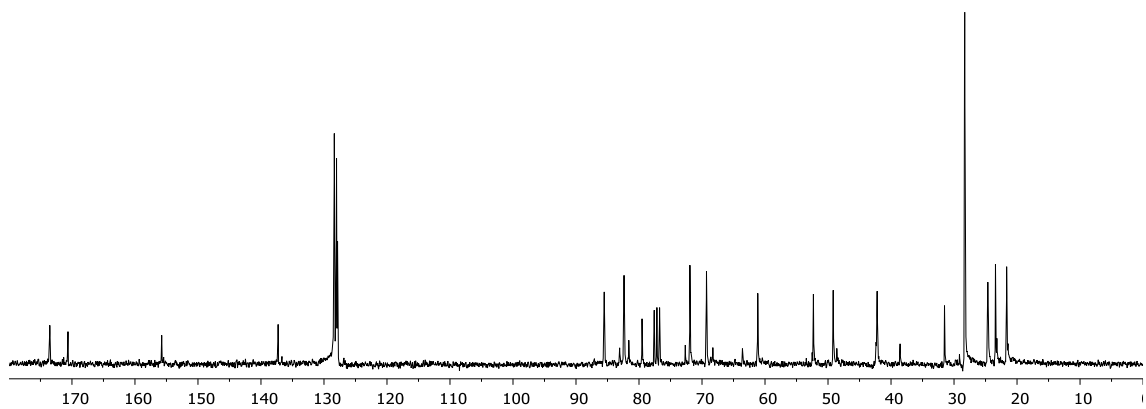

**Boc-D-Leu-L-MeN-Ahf(Bn)-OH (dp5):**  $^1\text{H}$  NMR ( $\text{CDCl}_3$ , 298 K, 300 MHz), DEPT and  $^{13}\text{C}$  NMR ( $\text{CDCl}_3$ , 298 K, 75.4 MHz).

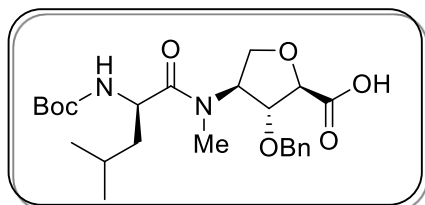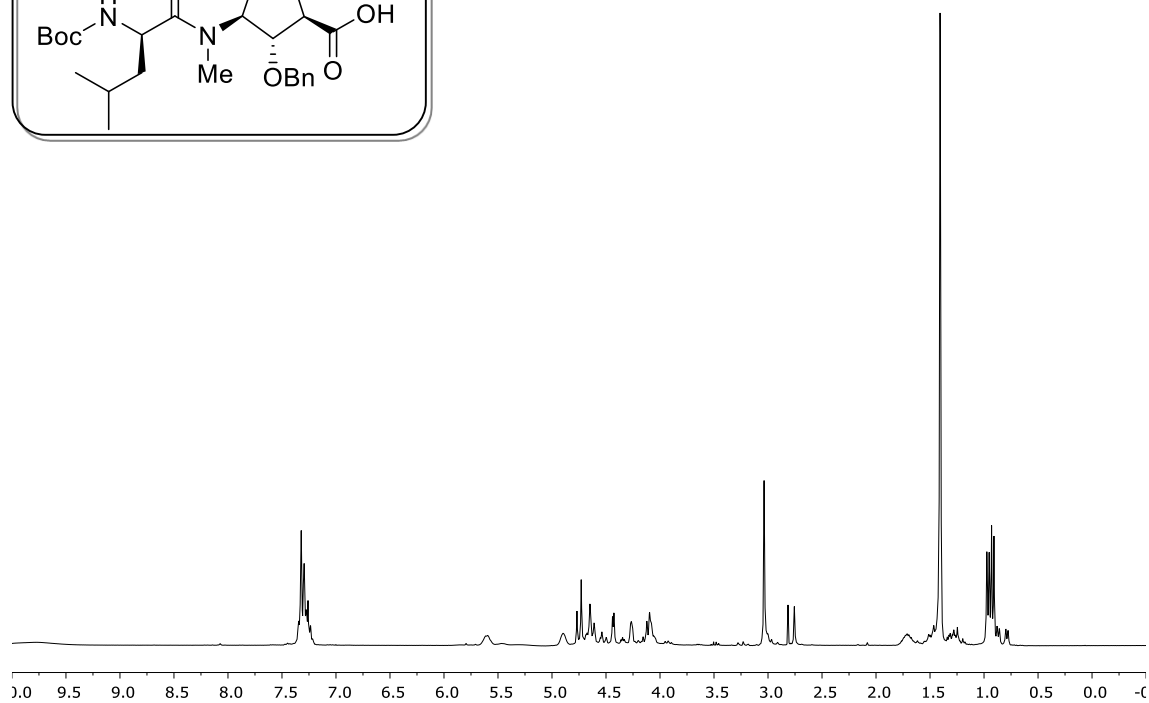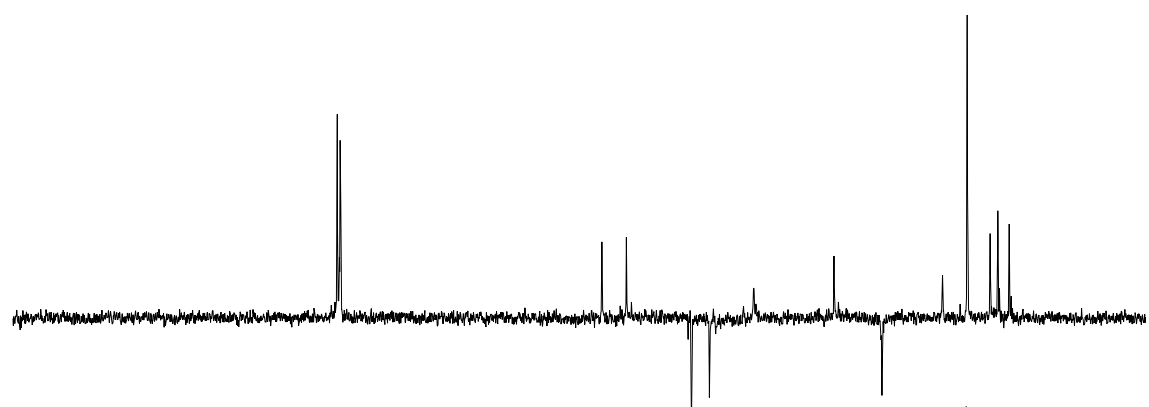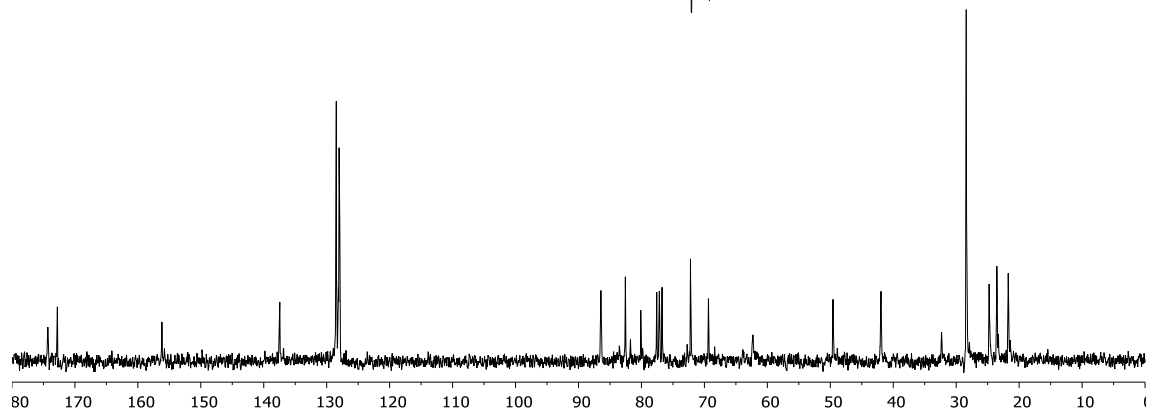



**Boc-D-Leu-L-Me<sup>e</sup>N-Ach-OFm (dp4):** <sup>1</sup>H NMR (CDCl<sub>3</sub>, 298 K, 300 MHz), DEPT and <sup>13</sup>C NMR (CDCl<sub>3</sub>, 298 K, 75.4 MHz).

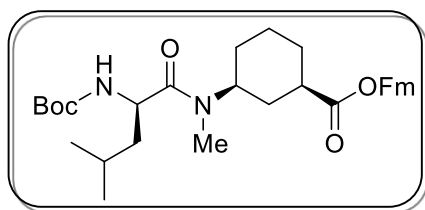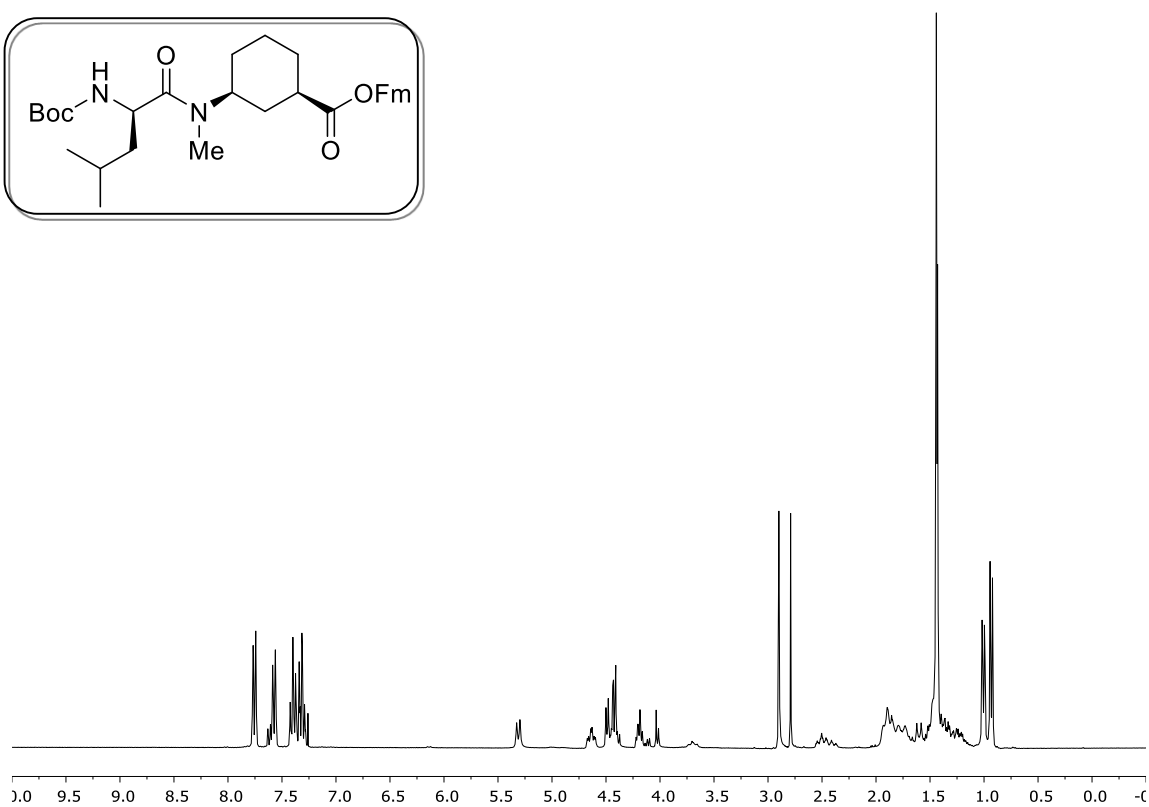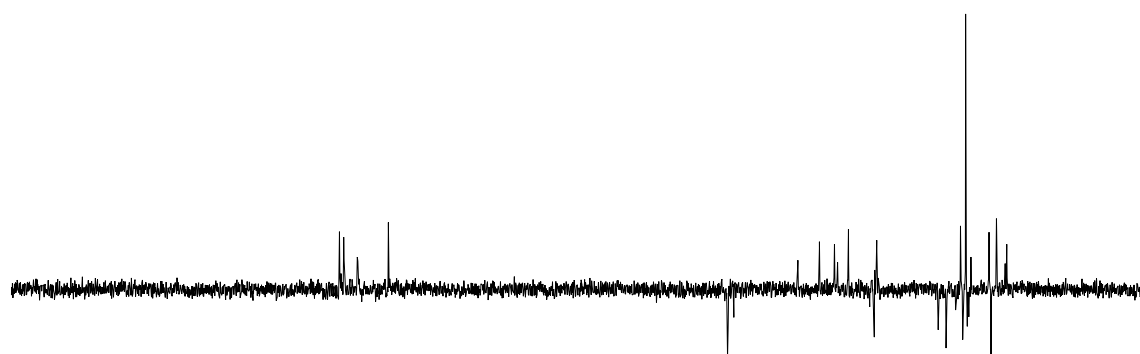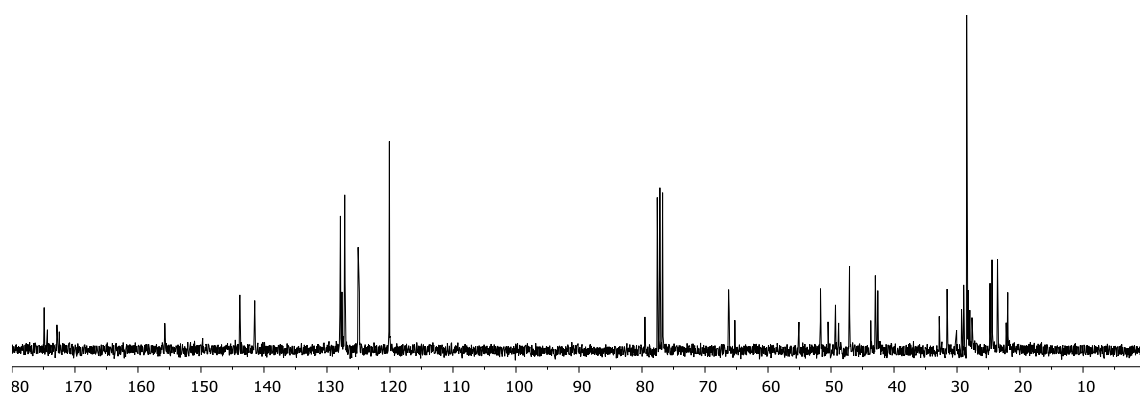

**c-{{L<sup>Me</sup>N-Ahf(Bn)-D-Leu<sup>1</sup>-L<sup>Me</sup>N-Ach-D-Leu<sup>2</sup>-}} (CP3): <sup>1</sup>H NMR (16 mM, CDCl<sub>3</sub>, 298 K, 500 MHz), DEPT and <sup>13</sup>C NMR (CDCl<sub>3</sub>, 298 K, 75.4 MHz).**

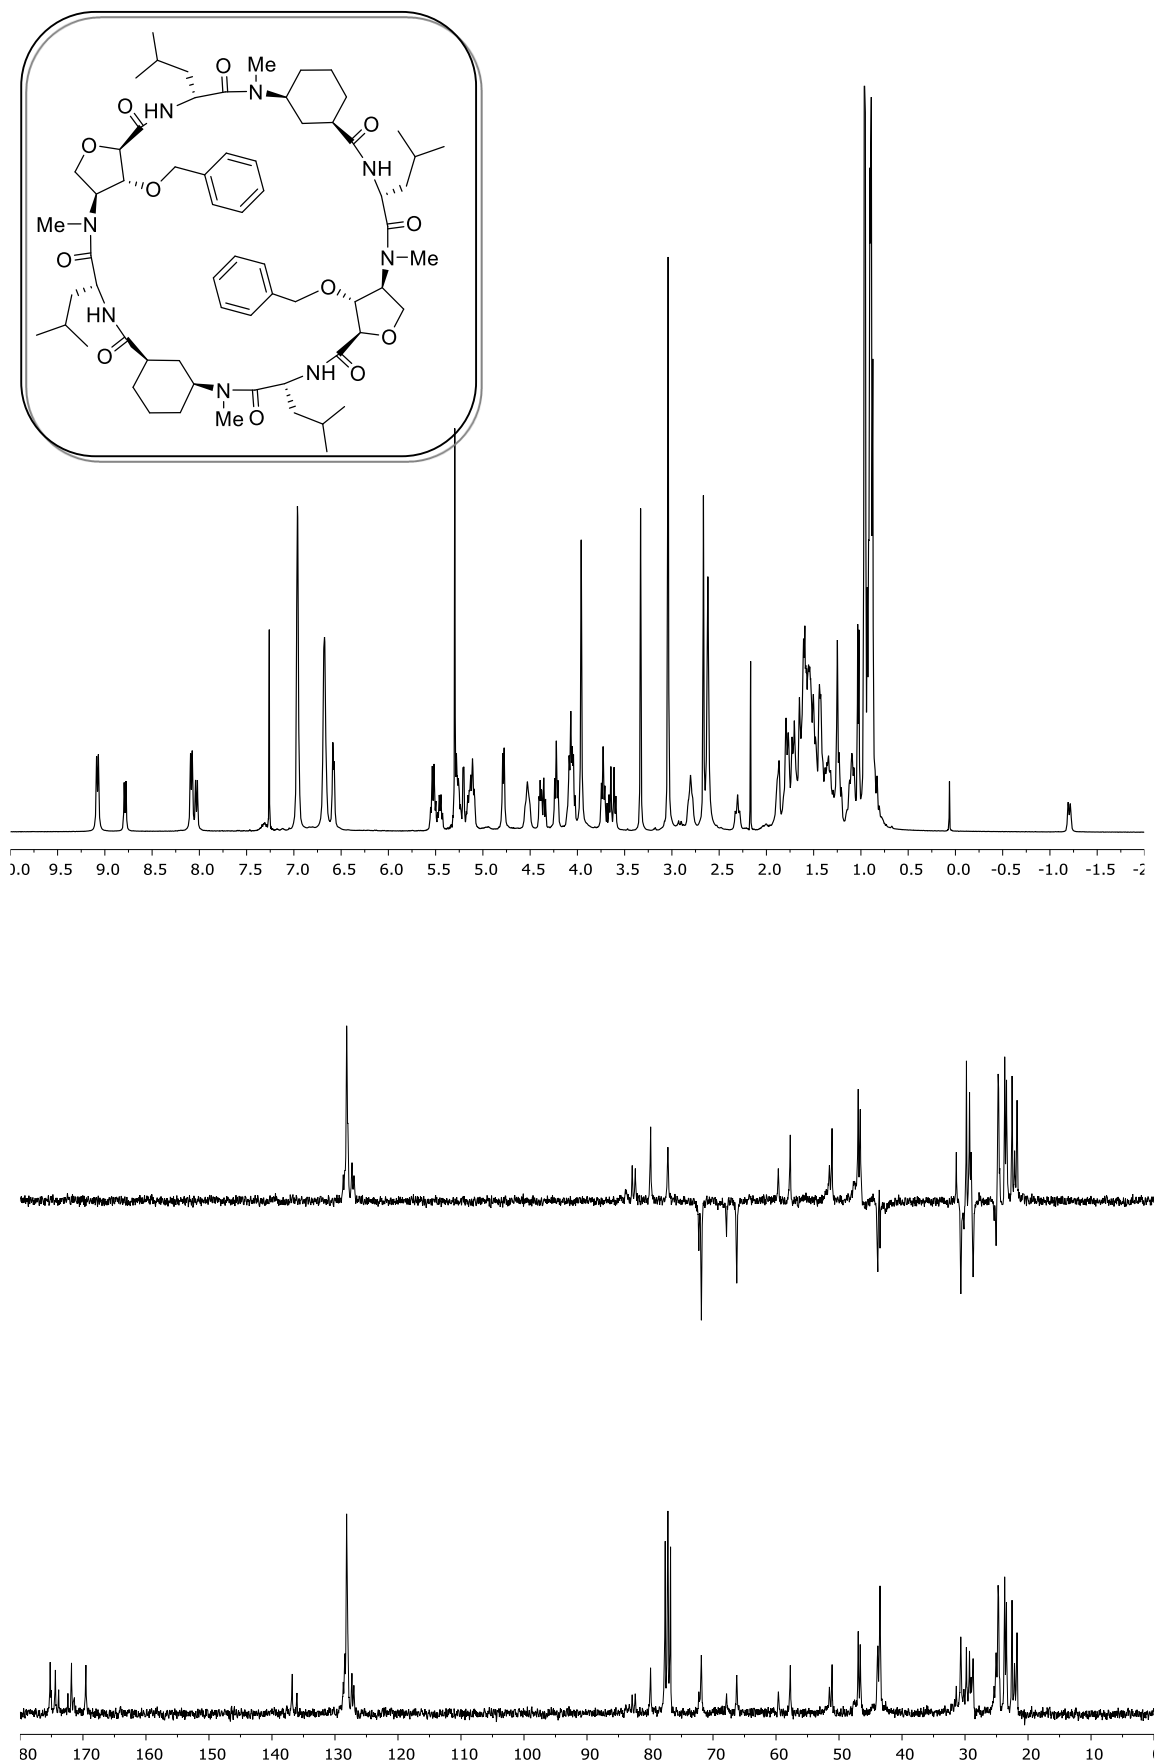

**COSY** (16 mM, CDCl<sub>3</sub>, 298 K, 500 MHz).

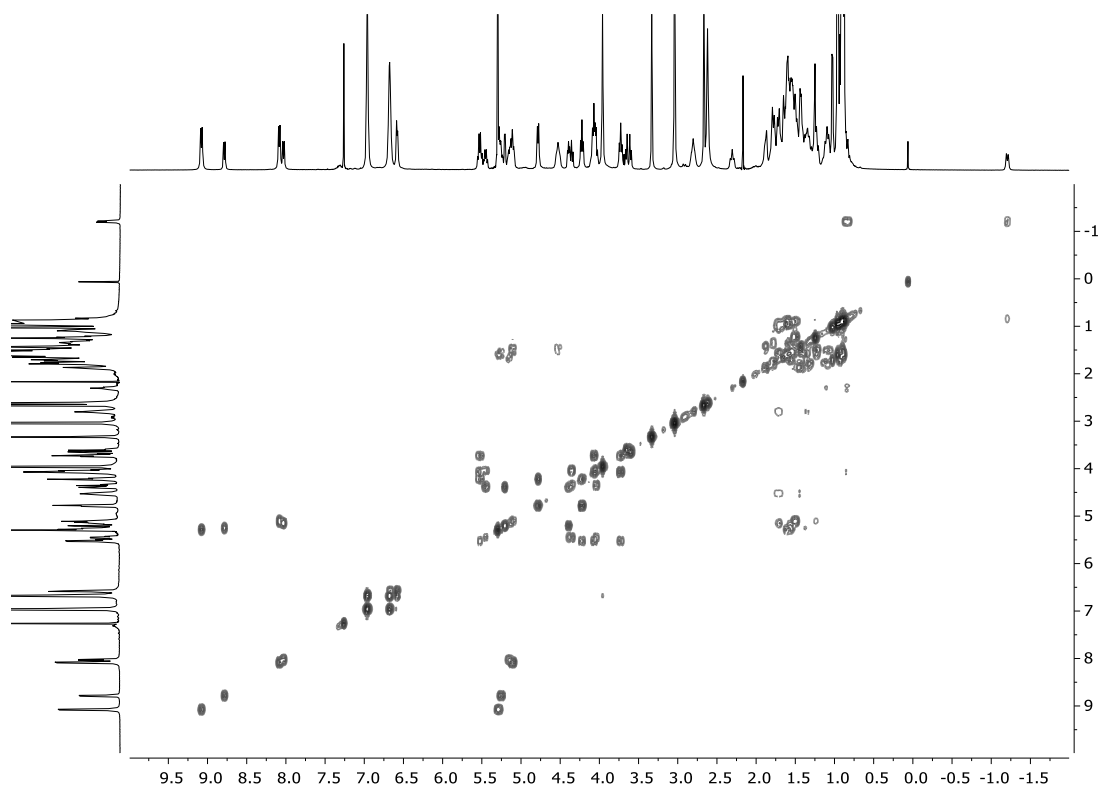

**TOCSY** (16 mM, CDCl<sub>3</sub>, 298 K, 500 MHz).

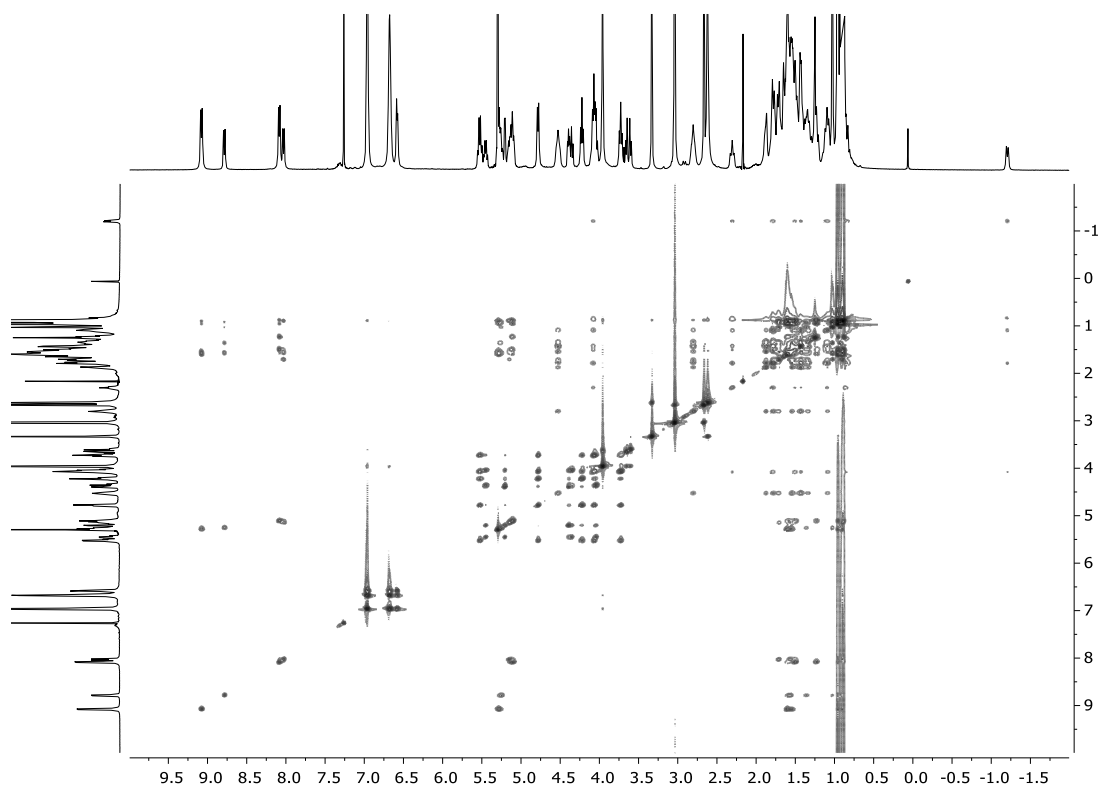

**NOESY** (16 mM, CDCl<sub>3</sub>, 298 K, 500 MHz).

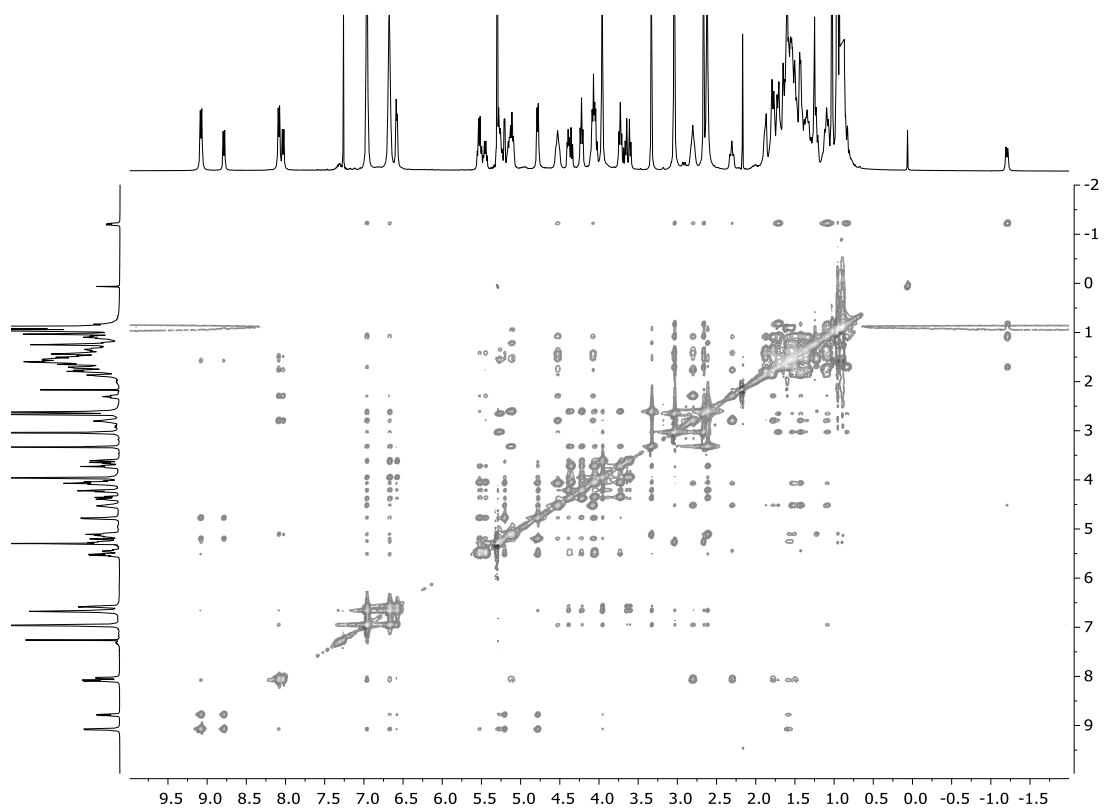

**ROESY** (16 mM, CDCl<sub>3</sub>, 298 K, 500 MHz).

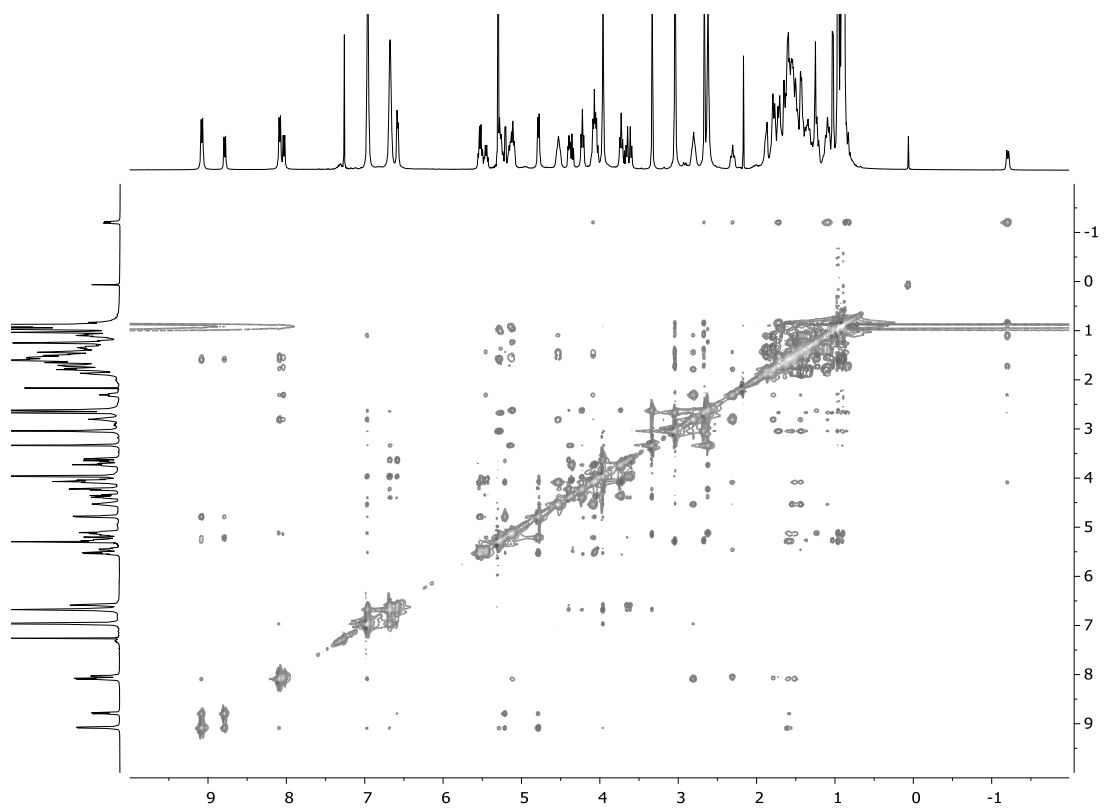

FTIR (298 K, CHCl<sub>3</sub>):

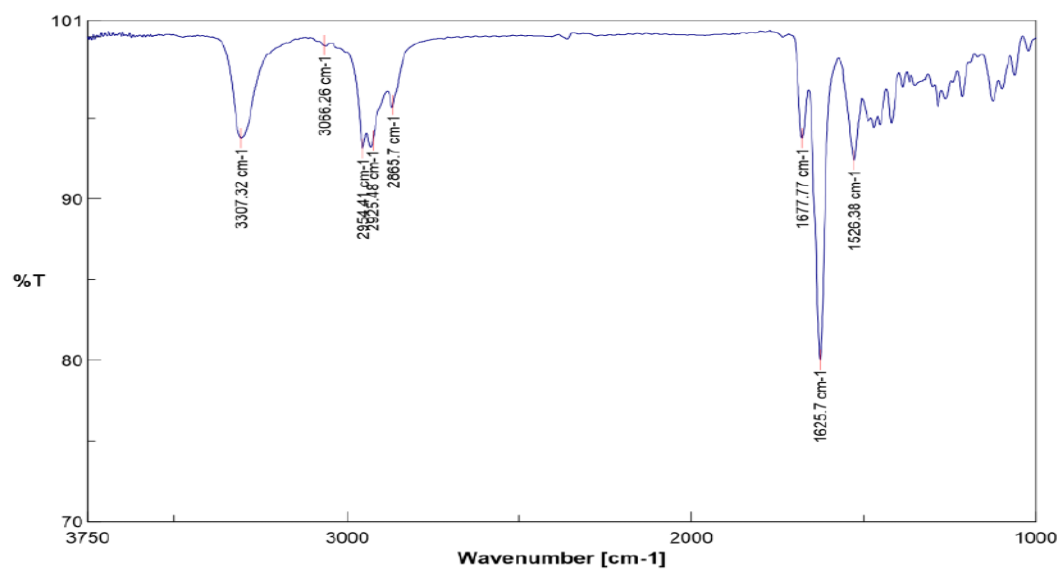

**c-{{L<sup>Me</sup>N-Ahf-D-Leu<sup>1</sup>-L<sup>Me</sup>N-Ach-D-Leu<sup>2</sup>-}} (CP4):**

**<sup>1</sup>H NMR** (5 mM, CDCl<sub>3</sub>, 298 K, 500 MHz).

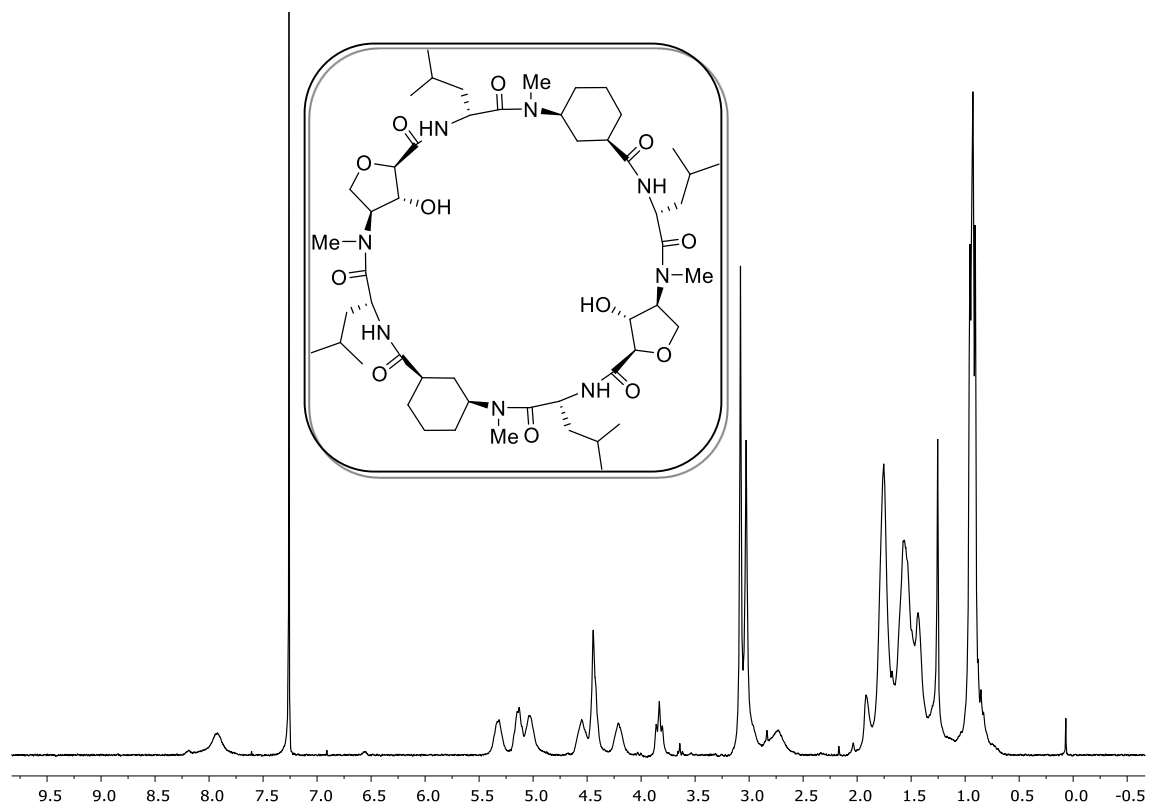

**<sup>1</sup>H NMR** (32 mM, CDCl<sub>3</sub>, 253 K, 500 MHz).

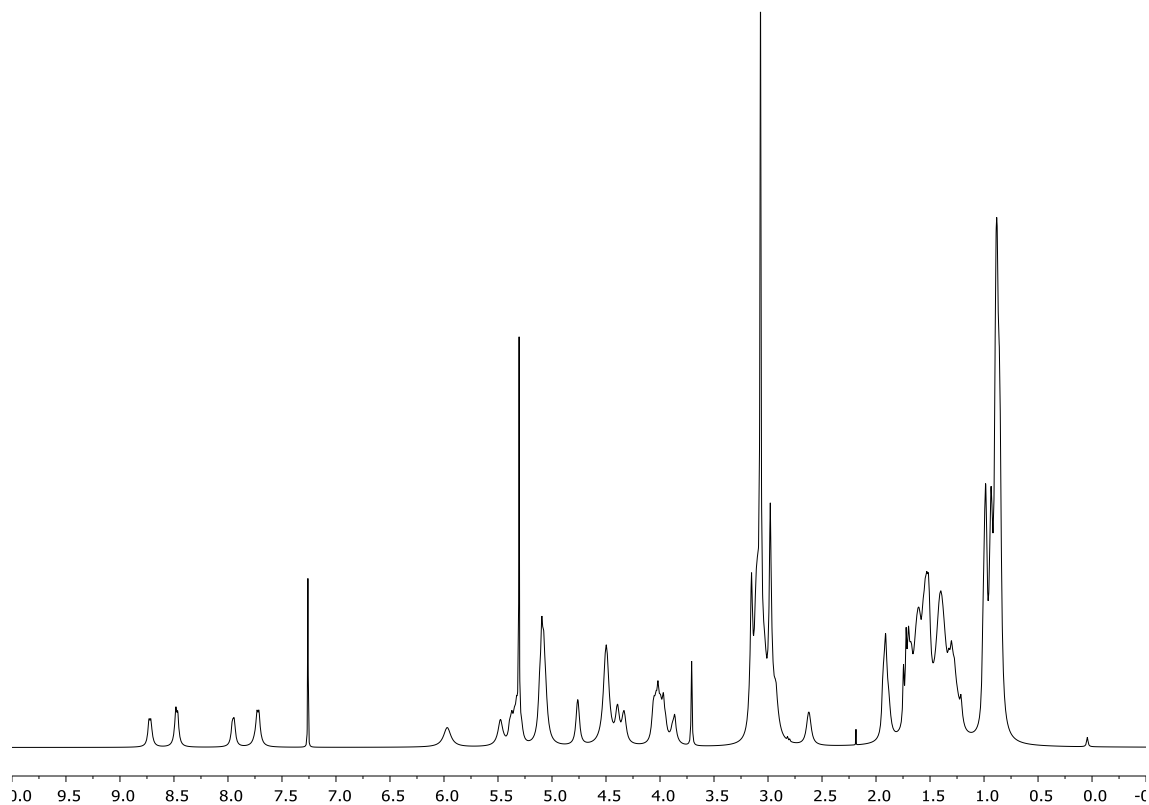

**COSY** (16 mM, CDCl<sub>3</sub>, 253 K, 500 MHz).

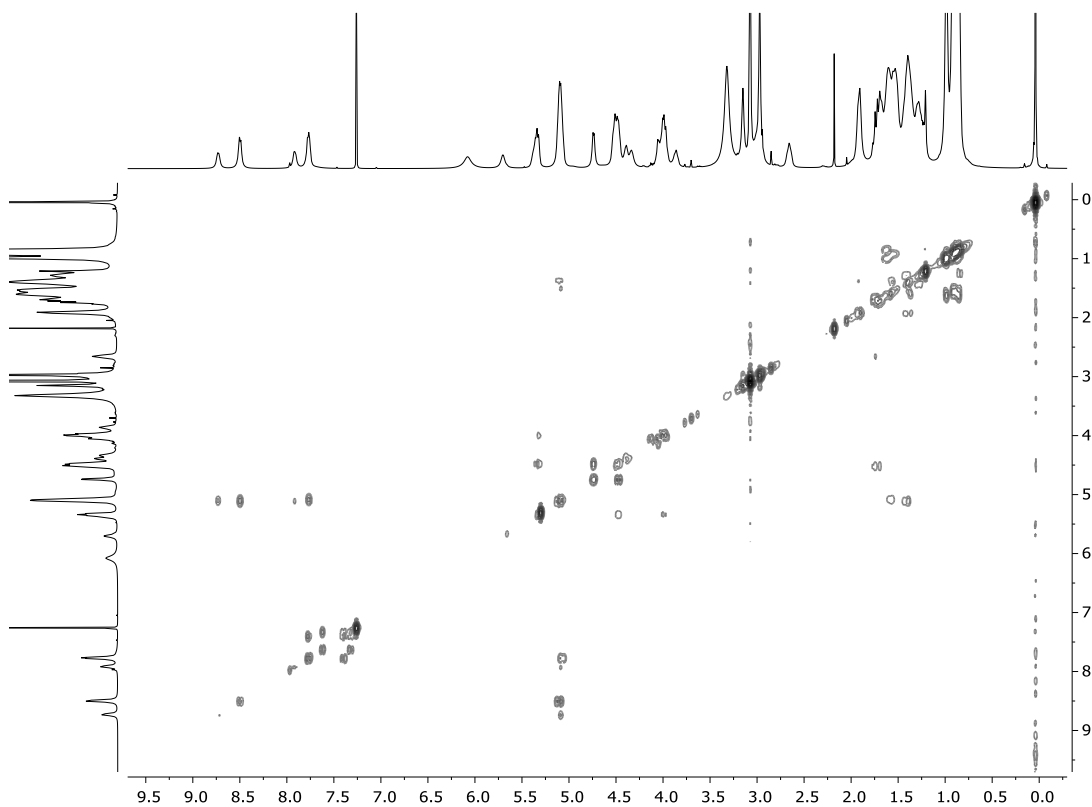

**TOCSY** (16 mM, CDCl<sub>3</sub>, 253 K, 500 MHz).

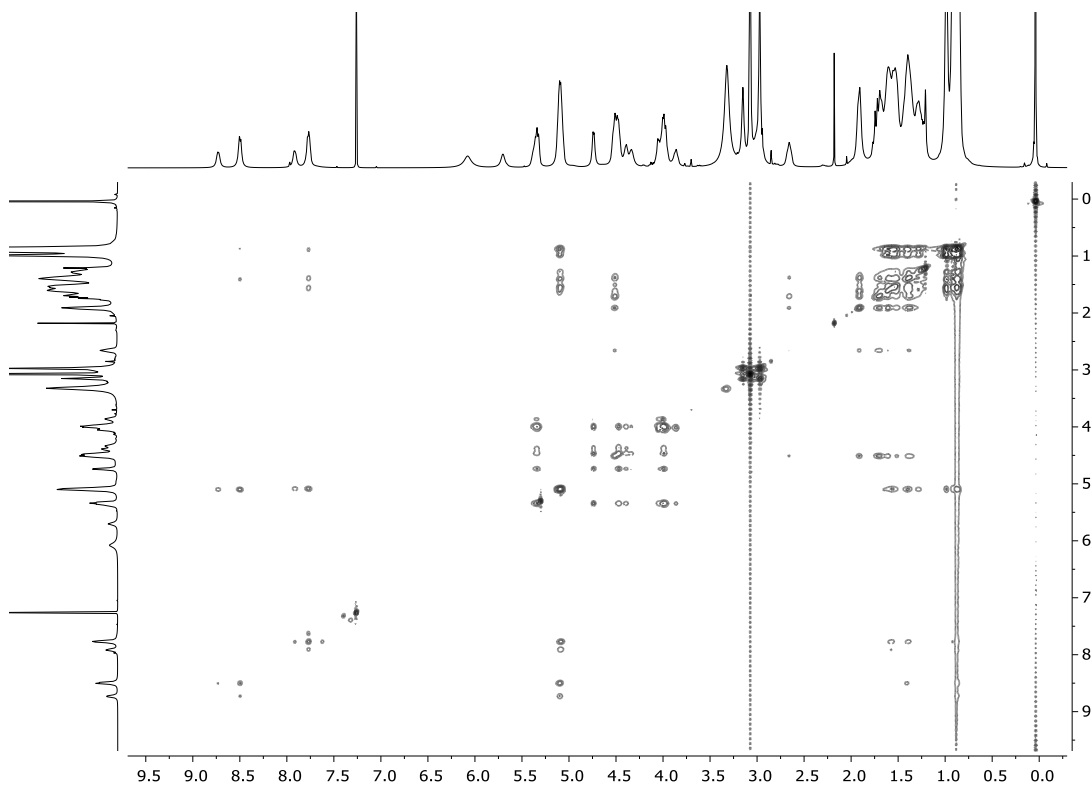

ROESY (16 mM, CDCl<sub>3</sub>, 253 K, 500 MHz).

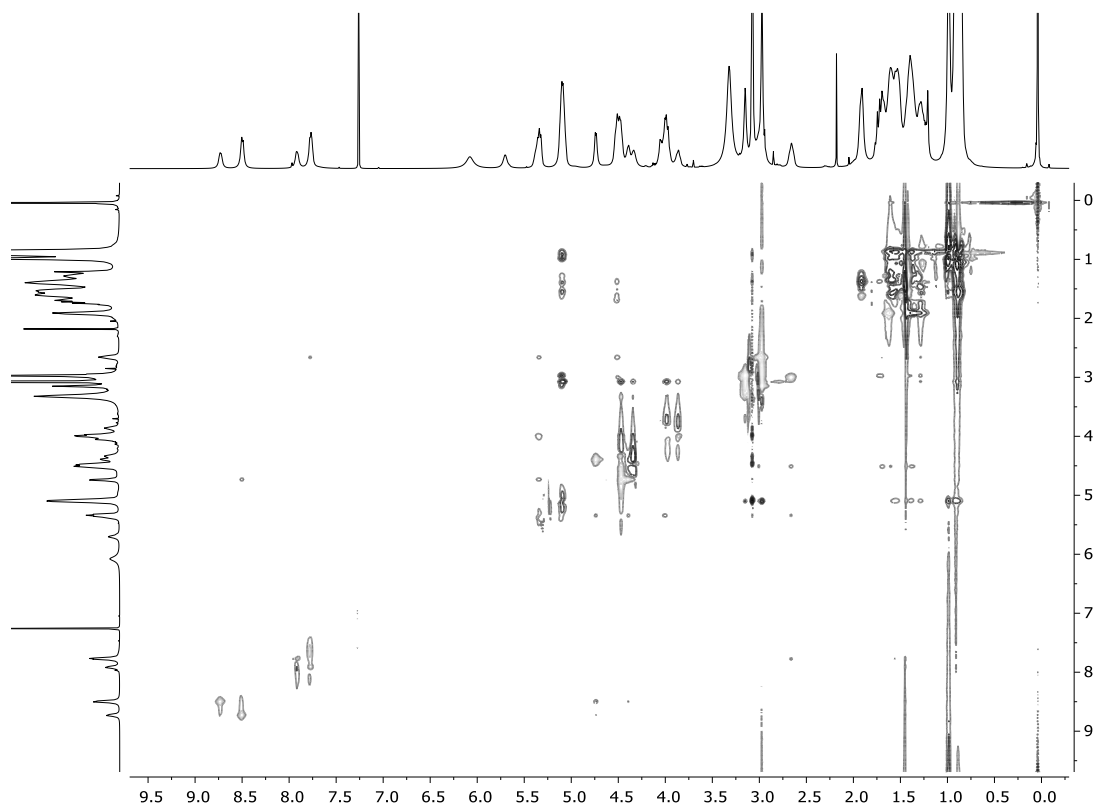

<sup>1</sup>H NMR (32 mM, 5% CD<sub>3</sub>OH/CDCl<sub>3</sub>, 253 K, 500 MHz).

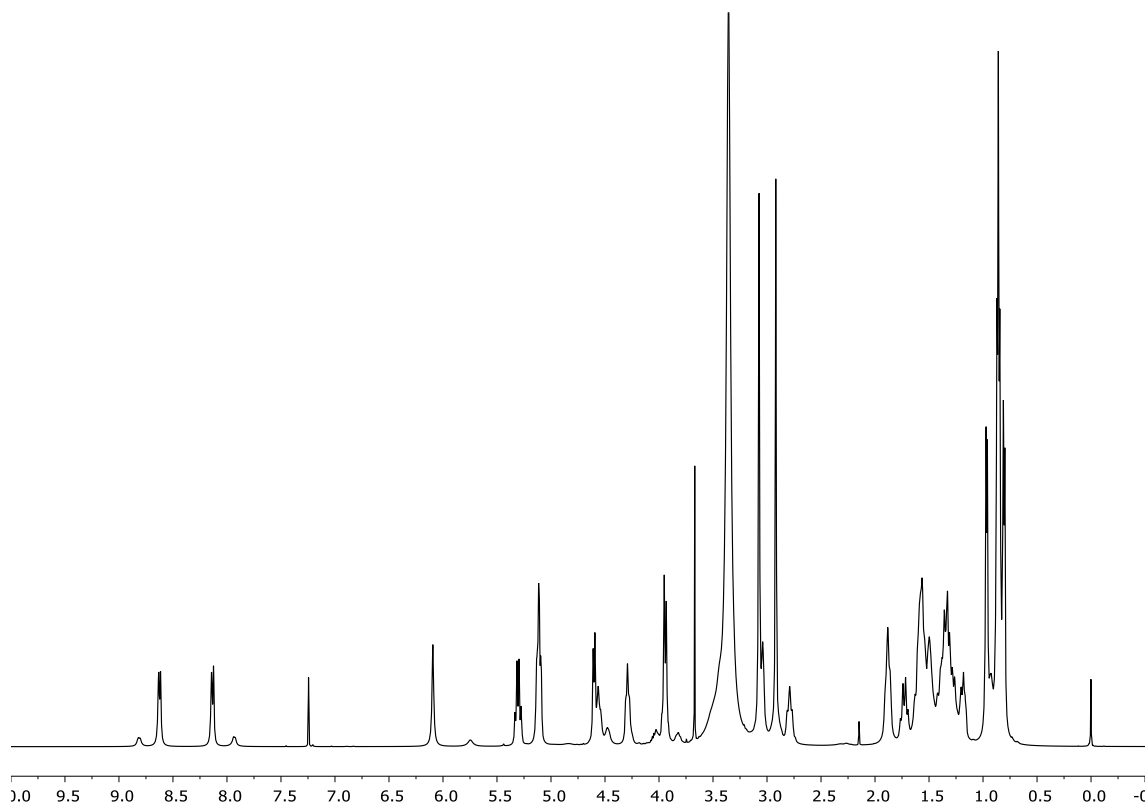



**COSY** (32 mM, 5% CD<sub>3</sub>OH/CDCl<sub>3</sub>, 253 K, 500 MHz).

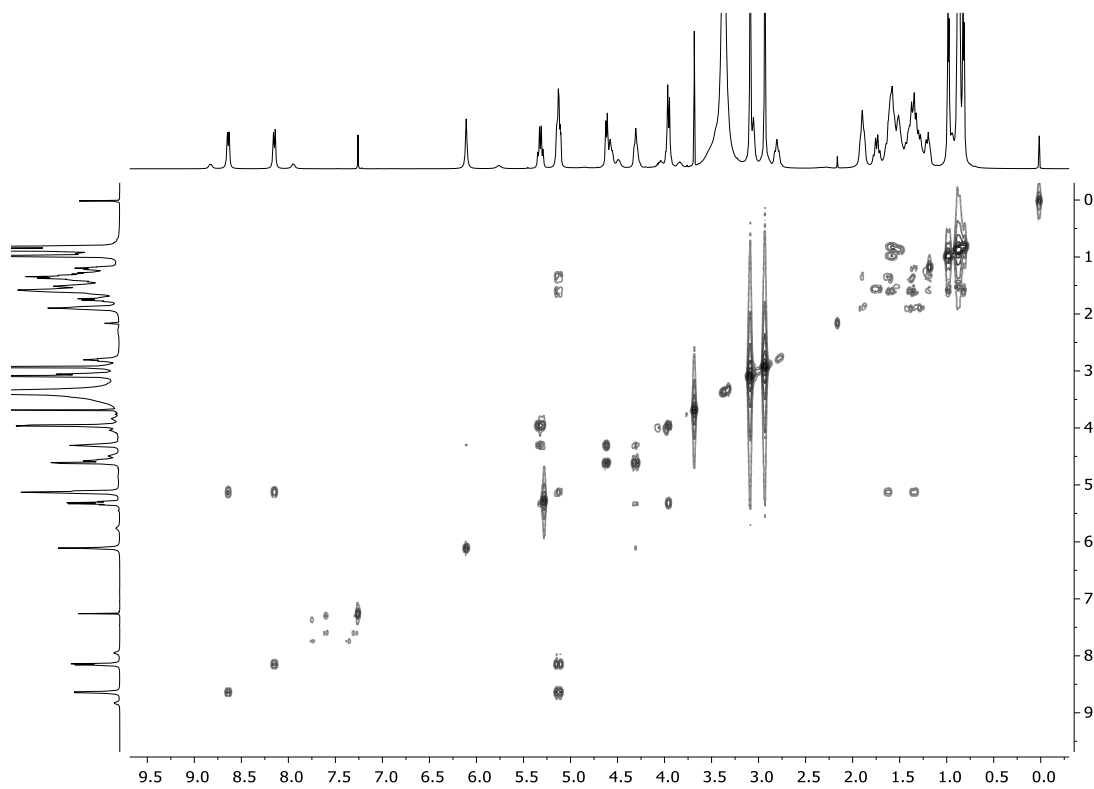

**TOCSY** (32 mM, 5% CD<sub>3</sub>OH/CDCl<sub>3</sub>, 253 K, 500 MHz).

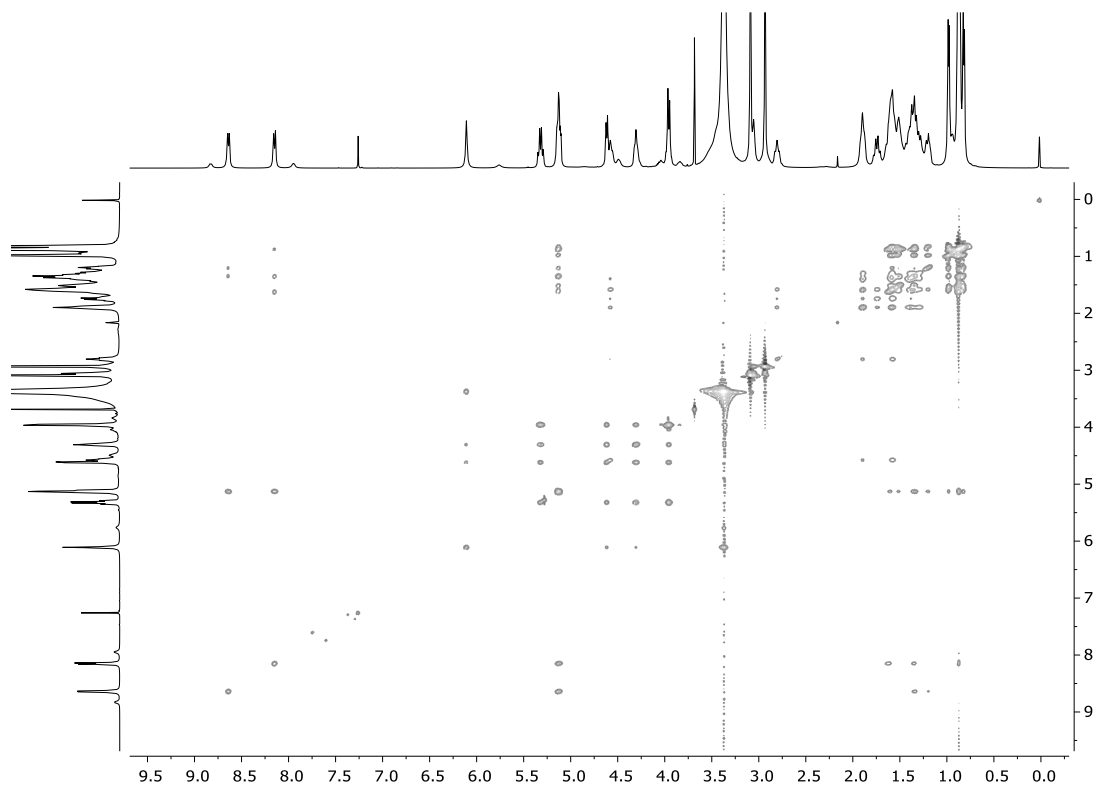

ROESY (32 mM, 5% CD<sub>3</sub>OH/CDCl<sub>3</sub>, 253 K, 500 MHz).

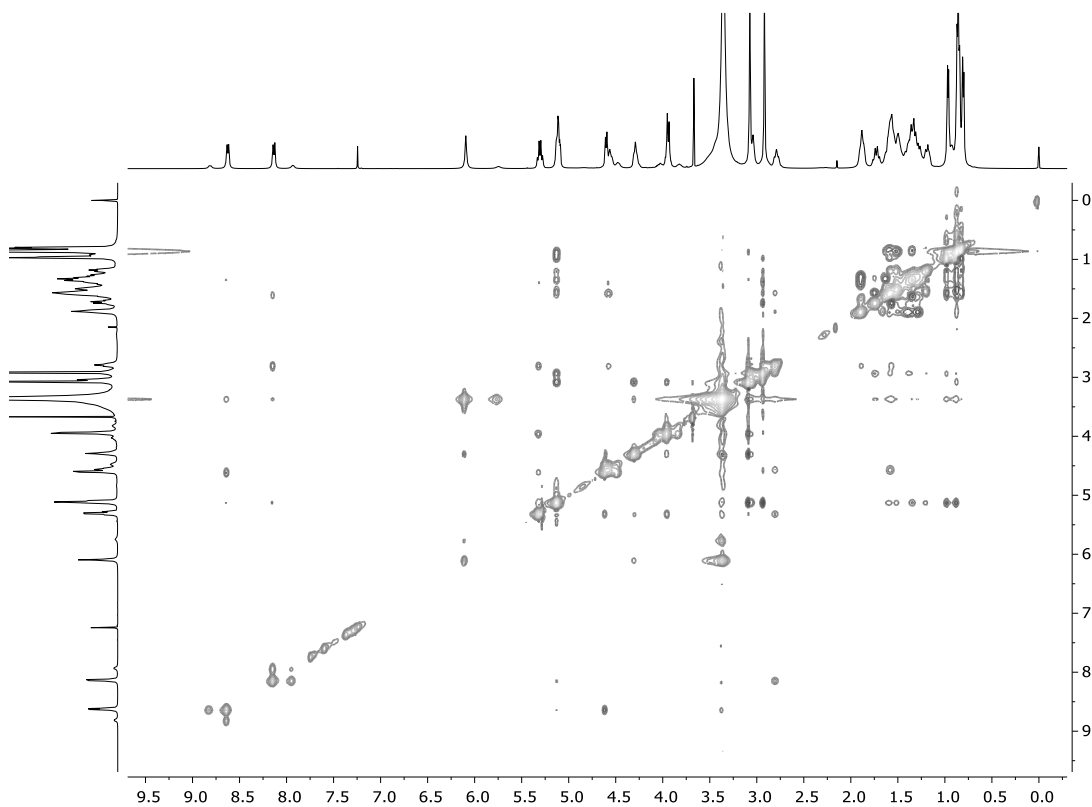

FTIR (298 K, CHCl<sub>3</sub>):

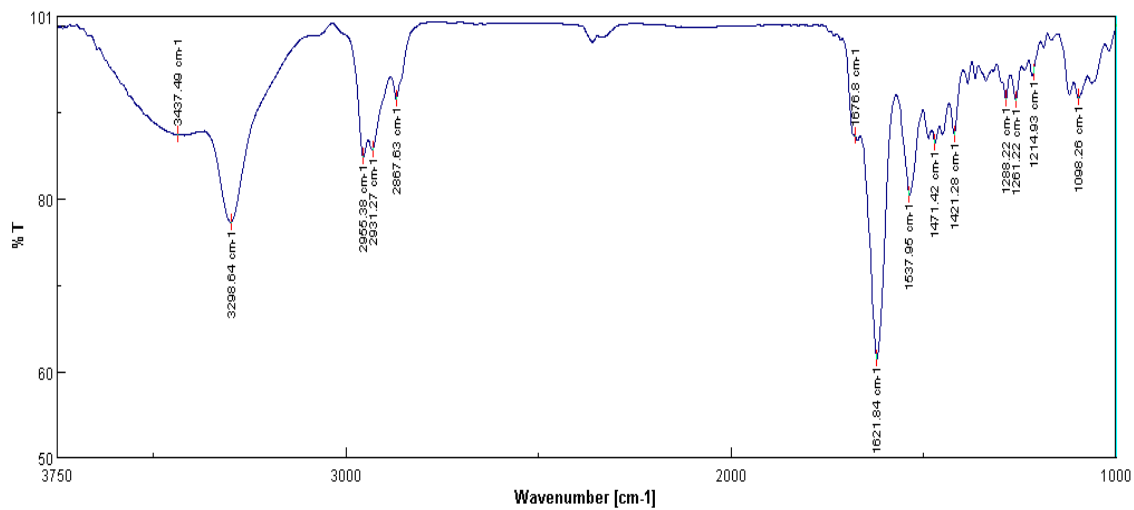

**c-[L-MeN-Ahf(pic)-D-Leu<sup>1</sup>-L-MeN-Ach<sup>1</sup>-D-Leu<sup>2</sup>-L-MeN-Ahf-D-Leu<sup>3</sup>-L-MeN-Ach<sup>2</sup>-D-Leu<sup>4</sup>-] (CP5):**

<sup>1</sup>H NMR (CDCl<sub>3</sub>, 298 K, 300 MHz).

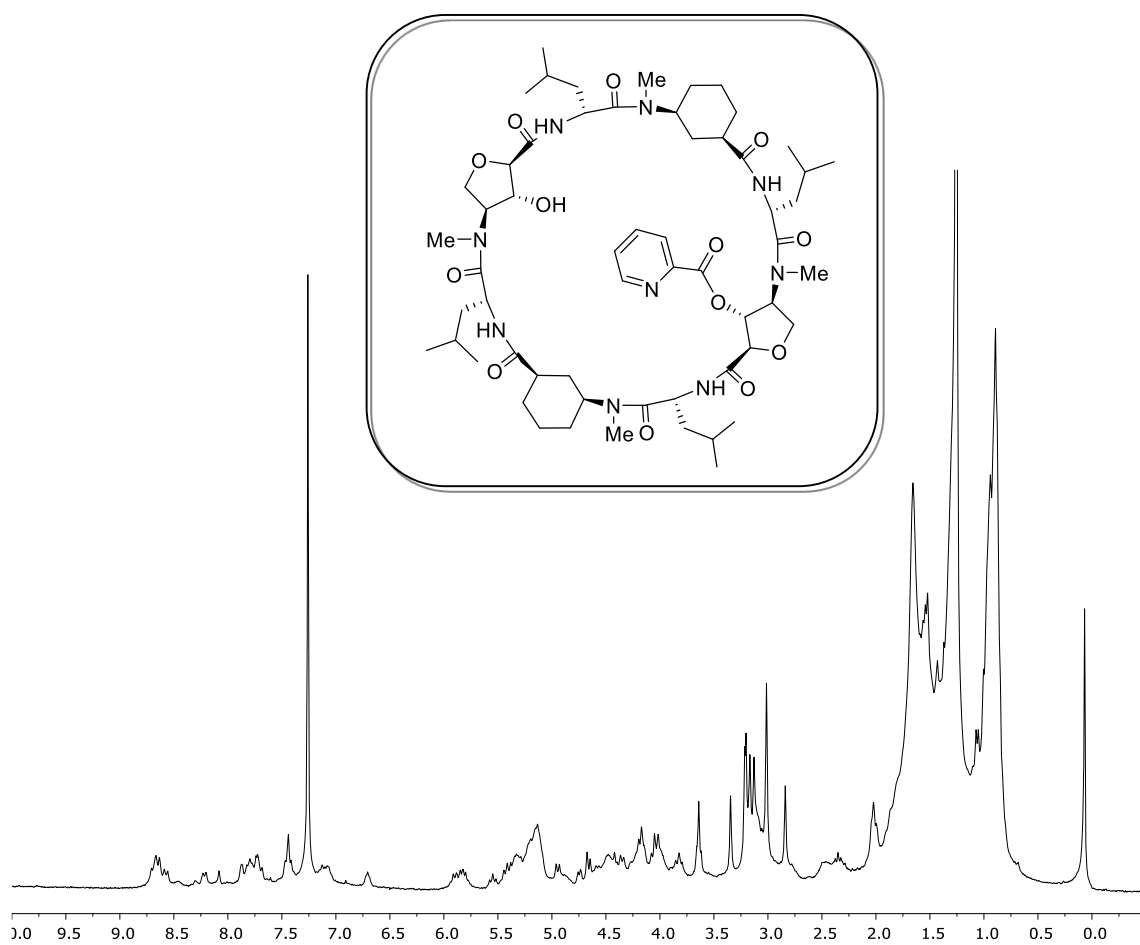

**FTIR (298 K, CHCl<sub>3</sub>):**

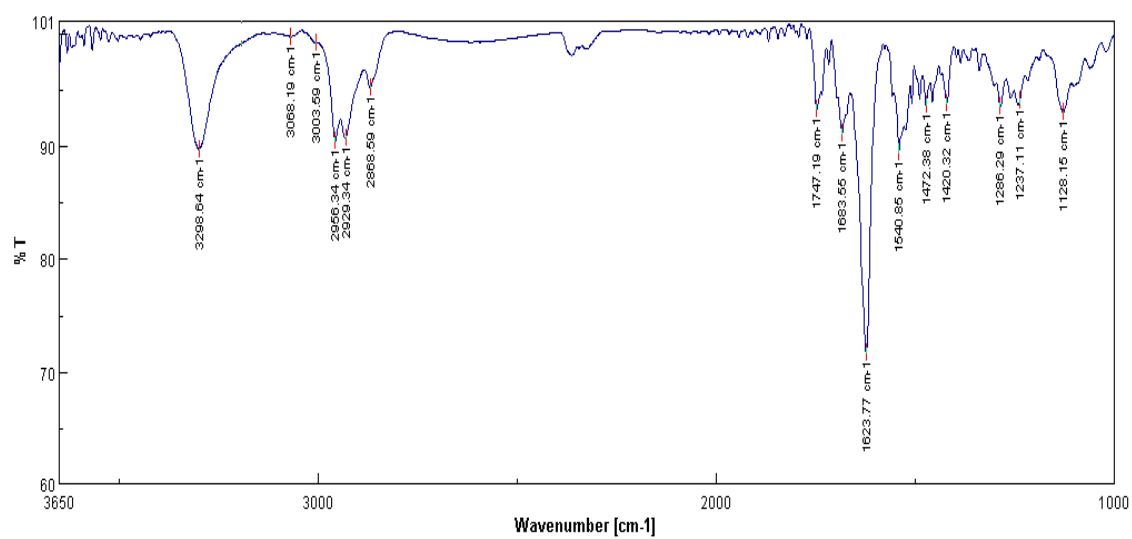

**c-[L-MeN-Ahf(pic)-D-Leu<sup>1</sup>-L-MeN-Ach<sup>1</sup>-D-Leu<sup>2</sup>-L-MeN-Ahf-D-Leu<sup>3</sup>-L-MeN-Ach<sup>2</sup>-D-Leu<sup>4</sup>]- + 0.5 equiv of AgBF<sub>4</sub> (s-D5E⊃Ag): <sup>1</sup>H NMR (4.5 mM, CDCl<sub>3</sub>, 298 K, 500 MHz).**

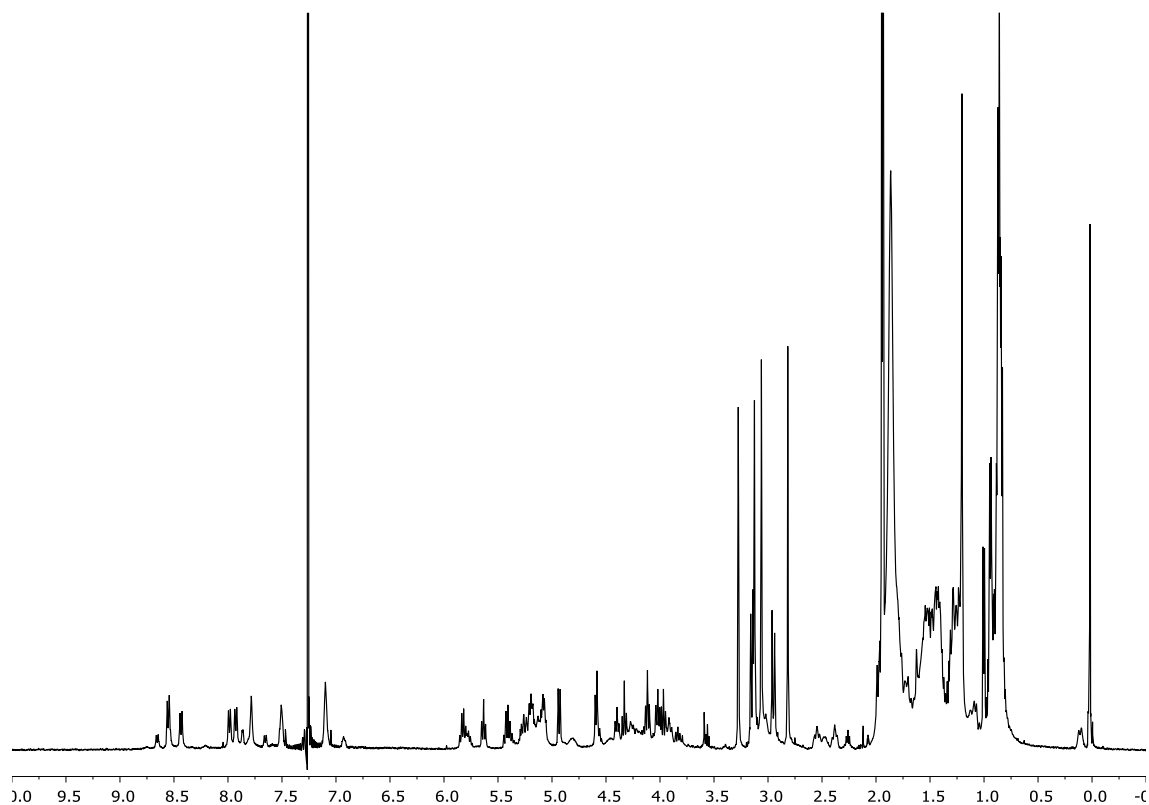

**COSY (4.5 mM, CDCl<sub>3</sub>, 298 K, 500 MHz).**

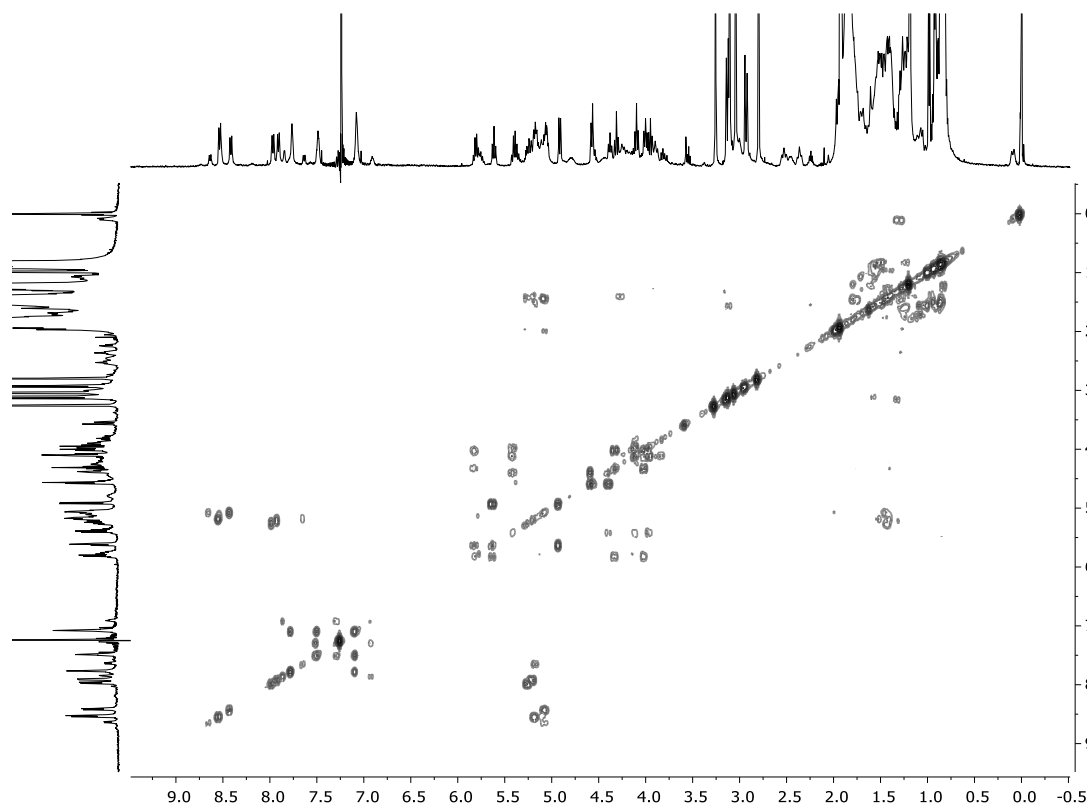

**TOCSY** (4.5 mM, CDCl<sub>3</sub>, 298 K, 500 MHz).

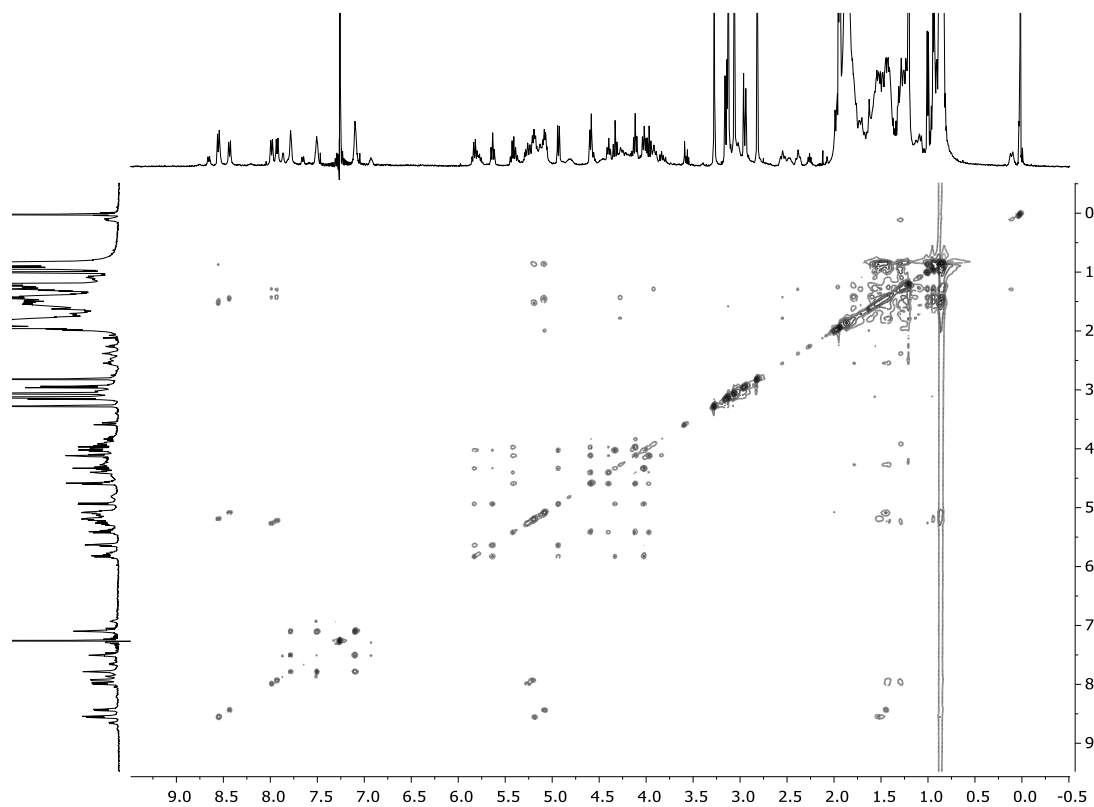

**NOESY** (4.5 mM, CDCl<sub>3</sub>, 298 K, 500 MHz).

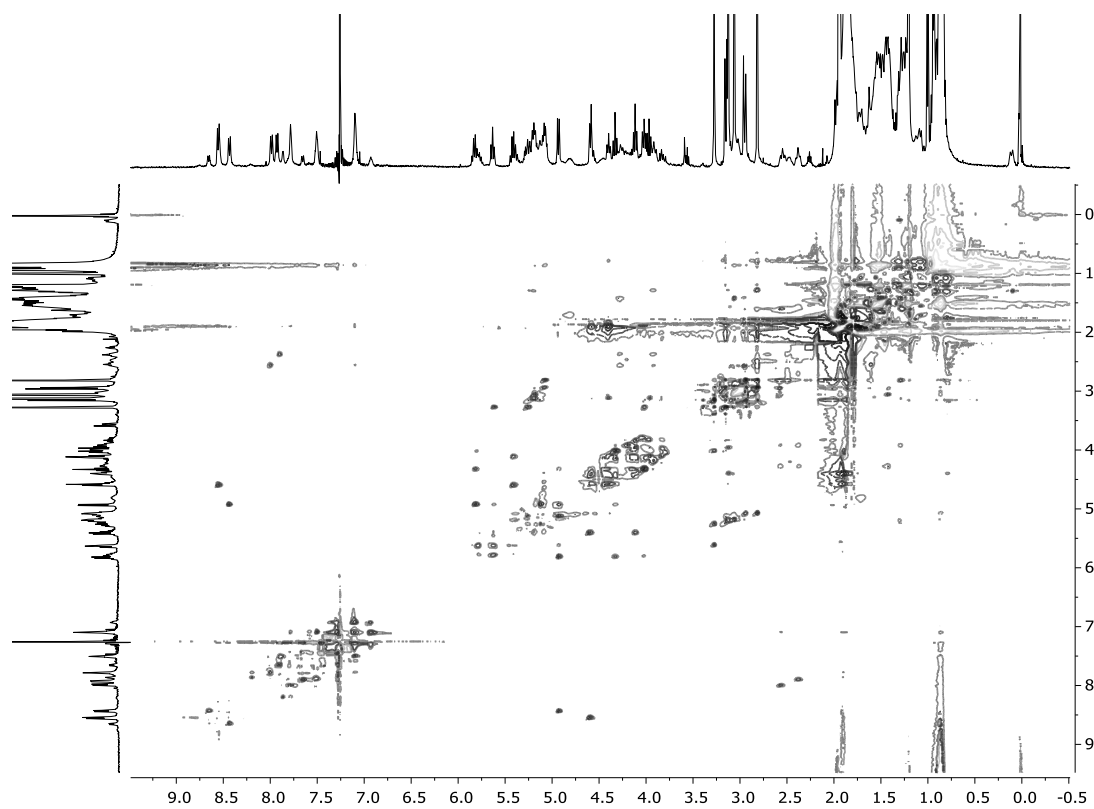

ROESY (4.5 mM, CDCl<sub>3</sub>, 298 K, 500 MHz).

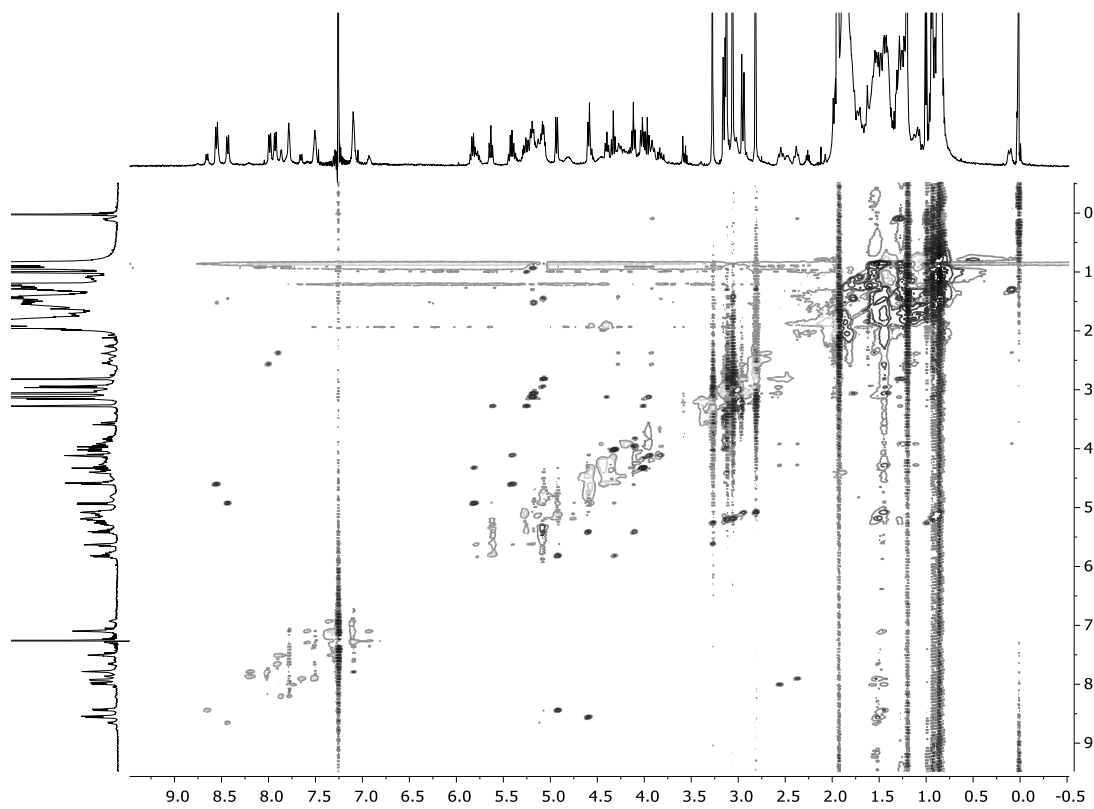

**c-[L-MeN-Ahf(pic)-D-Leu<sup>1</sup>-L-MeN-Ach<sup>1</sup>-D-Leu<sup>2</sup>-L-MeN-Ahf-D-Leu<sup>3</sup>-L-MeN-Ach<sup>2</sup>-D-Leu<sup>4</sup>]-** + 0.5 equiv  
of (CO<sub>2</sub>H)<sub>2</sub> · 2H<sub>2</sub>O (s-D5E⇌(CO<sub>2</sub>H)<sub>2</sub>): <sup>1</sup>H NMR (5 mM, CDCl<sub>3</sub>, 298 K, 500 MHz).

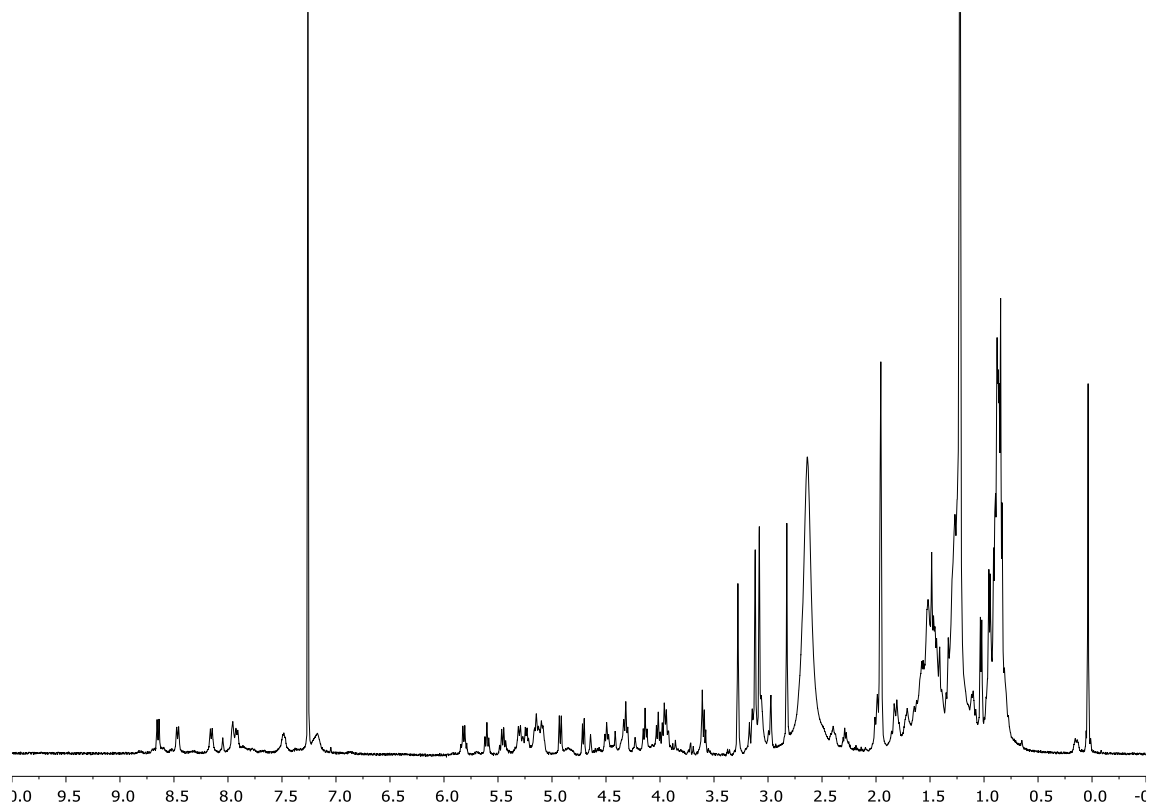

**COSY** (5 mM, CDCl<sub>3</sub>, 298 K, 500 MHz).

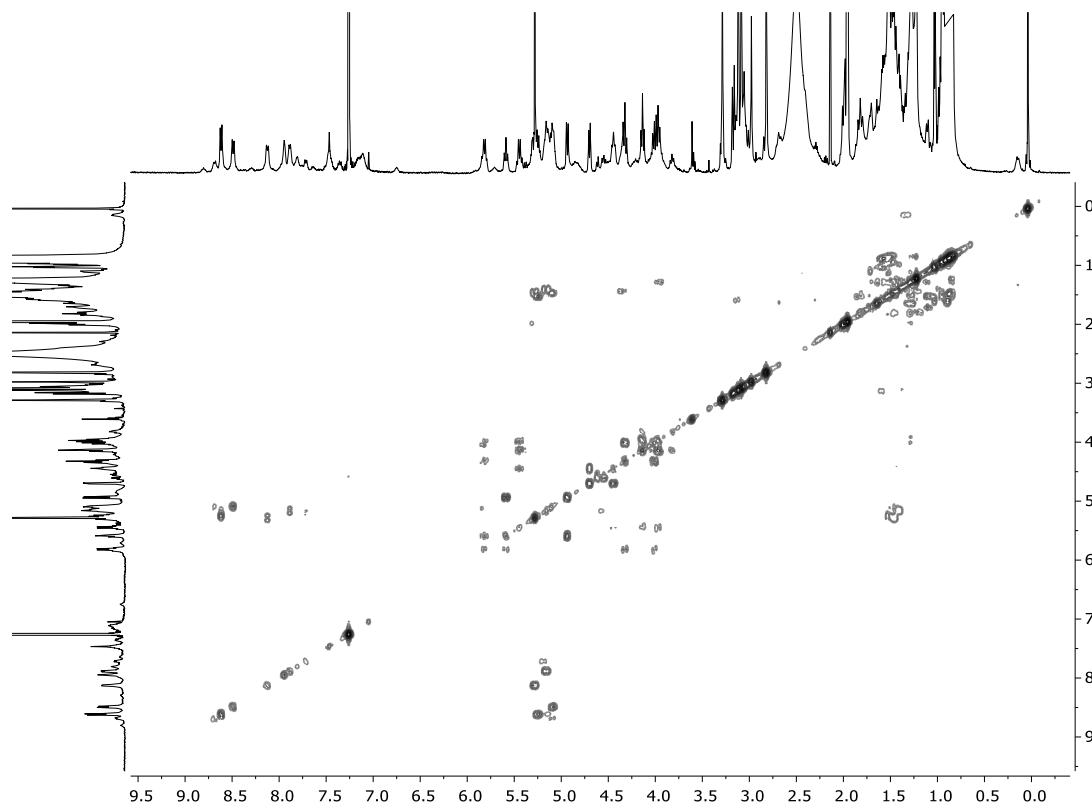

**TOCSY** (5 mM, CDCl<sub>3</sub>, 298 K, 500 MHz).

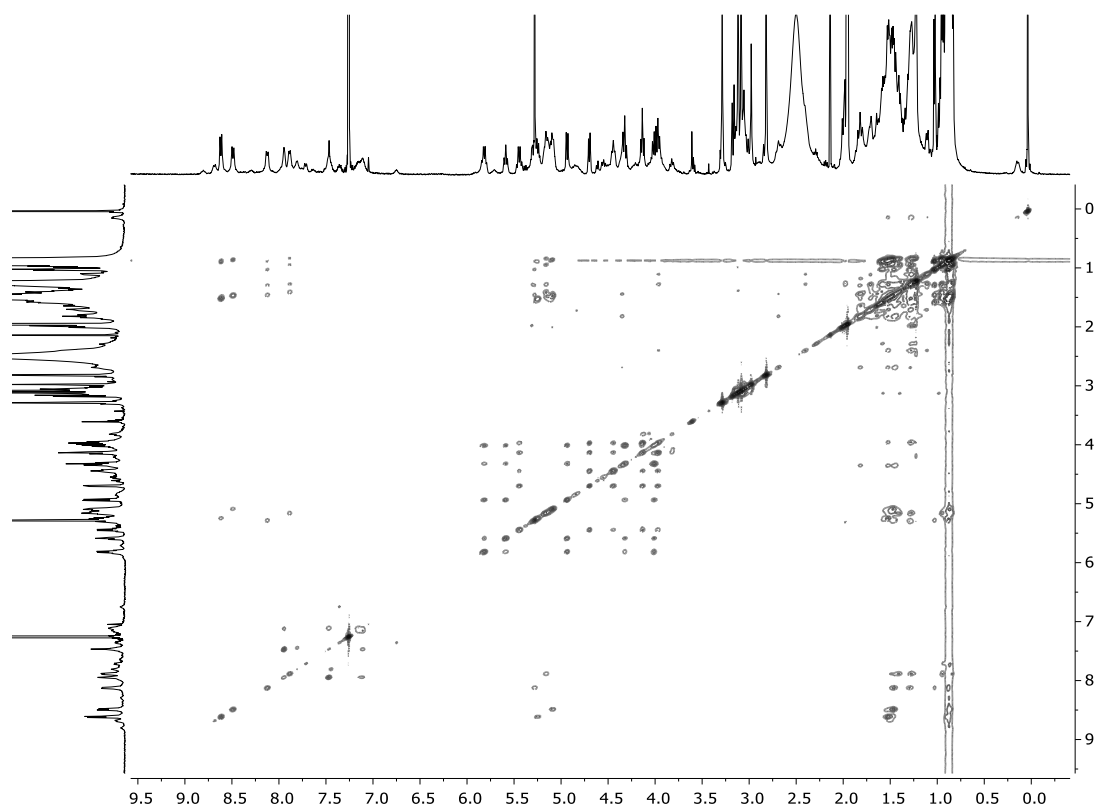

**NOESY** (5 mM, CDCl<sub>3</sub>, 298 K, 500 MHz).

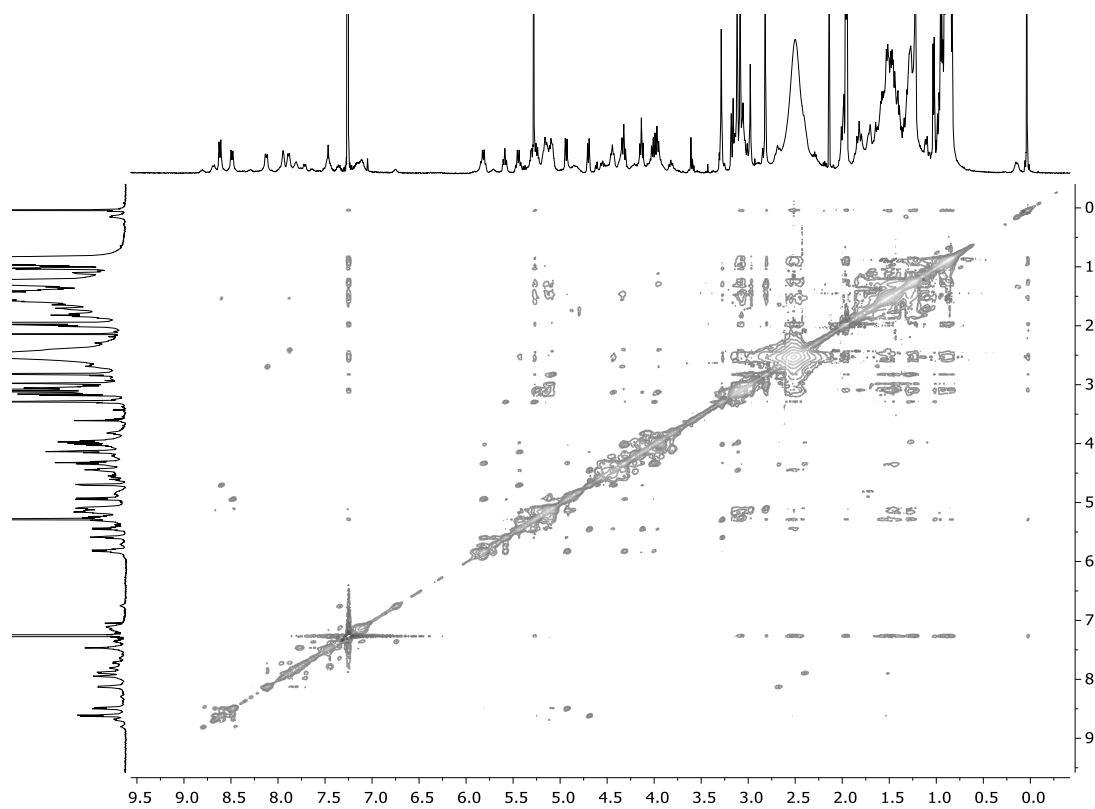



ROESY (5 mM, CDCl<sub>3</sub>, 298 K, 500 MHz).

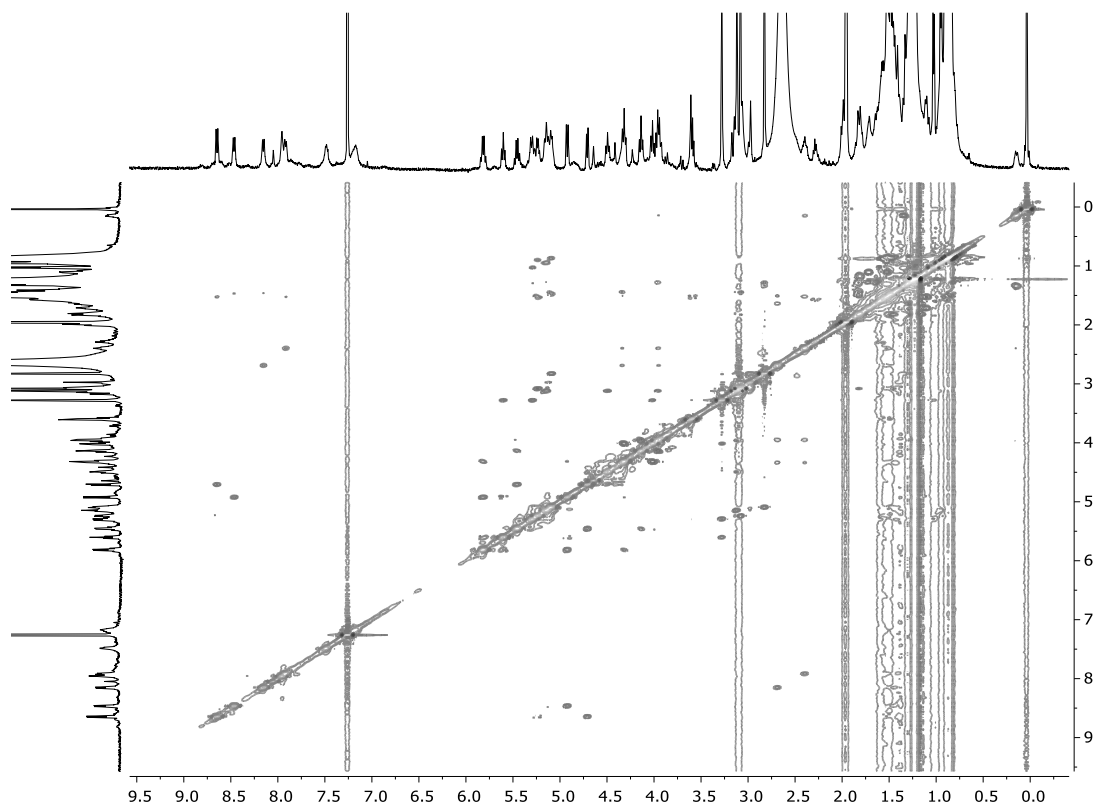

## Computational methods:

The starting geometries of the cyclic peptides investigated in this work were constructed from X-ray crystallographic data of related compounds: *c*-[(*D*-Phe-*L*-<sup>Me</sup>N- $\gamma$ -Ach-)<sub>4</sub>][1] and previous simulations carried out with related systems[2]. The silver complex from these dimers was built using the optimized structures of bis(methyl picolinate) silver(I) complexes. All DFT calculations were carried out using the B3LYP[3] functional with the standard 6-31G(d) basis set for C, N, O and H[4] and Lanl2dz pseudopotential basis set for Ag[5], as implemented in the Gaussian 09[6] program package.

[1] Amorín, M., Castedo, L. and Granja, J. R.; Self-Assembled Peptide Tubulets with 7 Å Pores. *Chem. Eur. J.* **2005**, *11*, 6543–6551.

[2] (a) Garcia-Fandino, R.; Castedo, L.; Granja, J. R.; Vázquez, S. Interaction and Dimerization Energies in Methyl-Blocked  $\alpha,\gamma$ -Peptide Nanotube Segments. *J. Phys. Chem. B* **2010**, *114*, 4973–4983. (b) Garcia-Fandino, R.; Granja, J. R.; Marco, D. A.; Orozco, M. Theoretical characterization of the dynamical behavior and transport properties of  $\alpha,\gamma$ -peptide nanotubes in solution. *J. Am. Chem. Soc.* **2009**, *131*, 15678-15686. (c) García-Fandiño, R; Granja, J. R. From  $\alpha,\gamma$ -cyclic peptides to homo/hetero dimers and nanotubes in polar and non-polar solvents. Towards control of nanotube length: a computational study. *J. Phys. Chem. C.* **2013**, *117*, 10143-10162. (d) Garcia-Fandino, R.; Amorin, M.; Castedo, L.; Granja, J. R. Transmembrane ion transport by self-assembling  $\alpha,\gamma$ -peptide nanotubes. *Chem. Sci.* **2012**, *3*, 3280-3285.

[3] Becke, A. D. Density-functional thermochemistry. III. The role of exact exchange, *J. Chem. Phys.* **1993**, *98*, 5648-52.

[4] Hehre, W. J.; Radom, L.; Schleyer, P. v. R.; Pople, J. A. *Ab Initio Molecular Orbital Theory*, 1st ed.; Wiley: New York, 1986.

[5] Hay, P. J.; Wadt, W. R. Ab initio effective core potentials for molecular calculations - potentials for the transition-metal atoms Sc to Hg. *J. Chem. Phys.* **1985**, *82*, 270-83.

[6] Frisch, M. J.; Trucks, G. W.; Schlegel, H. B.; Scuseria, G. E.; Robb, M. A.; Cheeseman, J. R. et al., *Gaussian 09, Revision A.01*, Gaussian Inc., Wallingford, CT, USA, **2009**.

## Geometries

Cartesian coordinates (Å) of conformations optimized at the B3LYP/6-31G(d) basis set for C, N, O and H and Lanl2dz pseudopotential basis set for Ag

Square planar bis(methyl picolinate) silver(I) complex

| Center<br>Number | Atomic<br>Number | Atomic<br>Type | Coordinates (Angstroms) |           |           |
|------------------|------------------|----------------|-------------------------|-----------|-----------|
|                  |                  |                | X                       | Y         | Z         |
| 1                | 6                | 0              | 4.129494                | -3.235475 | 0.341259  |
| 2                | 6                | 0              | 3.326356                | 3.043674  | -0.277417 |
| 3                | 6                | 0              | 2.106282                | 2.367067  | -0.224799 |
| 4                | 7                | 0              | 2.023797                | 1.035051  | -0.100148 |
| 5                | 6                | 0              | 3.164118                | 0.318997  | -0.020096 |
| 6                | 6                | 0              | 4.423229                | 0.918155  | -0.065254 |
| 7                | 6                | 0              | 4.503849                | 2.305581  | -0.196990 |
| 8                | 6                | 0              | 2.998973                | -1.171098 | 0.123802  |
| 9                | 8                | 0              | 4.169768                | -1.796073 | 0.196482  |
| 10               | 8                | 0              | 1.917643                | -1.736553 | 0.169547  |
| 11               | 6                | 0              | -4.133667               | 3.233334  | 0.341120  |
| 12               | 8                | 0              | -4.172184               | 1.793882  | 0.196269  |
| 13               | 6                | 0              | -3.322343               | -3.044836 | -0.277613 |
| 14               | 6                | 0              | -2.103201               | -2.366545 | -0.224914 |
| 15               | 7                | 0              | -2.022628               | -1.034423 | -0.100252 |
| 16               | 6                | 0              | -3.163919               | -0.319958 | -0.020261 |
| 17               | 6                | 0              | -4.422205               | -0.920830 | -0.065500 |
| 18               | 6                | 0              | -4.500866               | -2.308371 | -0.197258 |
| 19               | 6                | 0              | -3.000653               | 1.170314  | 0.123702  |
| 20               | 8                | 0              | -1.919984               | 1.737045  | 0.169578  |
| 21               | 47               | 0              | -0.000048               | 0.001765  | -0.022877 |
| 22               | 1                | 0              | 3.606483                | -3.502706 | 1.261834  |
| 23               | 1                | 0              | 3.622283                | -3.682319 | -0.516340 |
| 24               | 1                | 0              | 5.171958                | -3.546543 | 0.381762  |
| 25               | 1                | 0              | 3.340425                | 4.123593  | -0.379162 |
| 26               | 1                | 0              | 1.164464                | 2.903538  | -0.282526 |
| 27               | 1                | 0              | 5.313111                | 0.305151  | 0.002105  |
| 28               | 1                | 0              | 5.471180                | 2.796775  | -0.234872 |
| 29               | 1                | 0              | -5.176512               | 3.543130  | 0.381553  |
| 30               | 1                | 0              | -3.611049               | 3.501150  | 1.261746  |
| 31               | 1                | 0              | -3.626926               | 3.680825  | -0.516419 |
| 32               | 1                | 0              | -3.334935               | -4.124773 | -0.379366 |
| 33               | 1                | 0              | -1.160595               | -2.901643 | -0.282567 |
| 34               | 1                | 0              | -5.312946               | -0.309063 | 0.001815  |
| 35               | 1                | 0              | -5.467507               | -2.800917 | -0.235219 |

**Perpendicularly oriented bis(methyl picolinate) silver(I) complex**

| Center<br>Number | Atomic<br>Number | Atomic<br>Type | Coordinates (Angstroms) |           |           |
|------------------|------------------|----------------|-------------------------|-----------|-----------|
|                  |                  |                | X                       | Y         | Z         |
| 1                | 6                | 0              | 4.129494                | -3.235475 | 0.341259  |
| 2                | 6                | 0              | 3.326356                | 3.043674  | -0.277417 |
| 3                | 6                | 0              | 2.106282                | 2.367067  | -0.224799 |
| 4                | 7                | 0              | 2.023797                | 1.035051  | -0.100148 |
| 5                | 6                | 0              | 3.164118                | 0.318997  | -0.020096 |
| 6                | 6                | 0              | 4.423229                | 0.918155  | -0.065254 |
| 7                | 6                | 0              | 4.503849                | 2.305581  | -0.196990 |
| 8                | 6                | 0              | 2.998973                | -1.171098 | 0.123802  |
| 9                | 8                | 0              | 4.169768                | -1.796073 | 0.196482  |
| 10               | 8                | 0              | 1.917643                | -1.736553 | 0.169547  |
| 11               | 6                | 0              | -4.133667               | 3.233334  | 0.341120  |
| 12               | 8                | 0              | -4.172184               | 1.793882  | 0.196269  |
| 13               | 6                | 0              | -3.322343               | -3.044836 | -0.277613 |
| 14               | 6                | 0              | -2.103201               | -2.366545 | -0.224914 |
| 15               | 7                | 0              | -2.022628               | -1.034423 | -0.100252 |
| 16               | 6                | 0              | -3.163919               | -0.319958 | -0.020261 |
| 17               | 6                | 0              | -4.422205               | -0.920830 | -0.065500 |
| 18               | 6                | 0              | -4.500866               | -2.308371 | -0.197258 |
| 19               | 6                | 0              | -3.000653               | 1.170314  | 0.123702  |
| 20               | 8                | 0              | -1.919984               | 1.737045  | 0.169578  |
| 21               | 47               | 0              | -0.000048               | 0.001765  | -0.022877 |
| 22               | 1                | 0              | 3.606483                | -3.502706 | 1.261834  |
| 23               | 1                | 0              | 3.622283                | -3.682319 | -0.516340 |
| 24               | 1                | 0              | 5.171958                | -3.546543 | 0.381762  |
| 25               | 1                | 0              | 3.340425                | 4.123593  | -0.379162 |
| 26               | 1                | 0              | 1.164464                | 2.903538  | -0.282526 |
| 27               | 1                | 0              | 5.313111                | 0.305151  | 0.002105  |
| 28               | 1                | 0              | 5.471180                | 2.796775  | -0.234872 |
| 29               | 1                | 0              | -5.176512               | 3.543130  | 0.381553  |
| 30               | 1                | 0              | -3.611049               | 3.501150  | 1.261746  |
| 31               | 1                | 0              | -3.626926               | 3.680825  | -0.516419 |
| 32               | 1                | 0              | -3.334935               | -4.124773 | -0.379366 |
| 33               | 1                | 0              | -1.160595               | -2.901643 | -0.282567 |
| 34               | 1                | 0              | -5.312946               | -0.309063 | 0.001815  |
| 35               | 1                | 0              | -5.467507               | -2.800917 | -0.235219 |

Syn-eclipsed dimer

| Center Number | Atomic Number | Atomic Type | Coordinates (Angstroms) |           |           |
|---------------|---------------|-------------|-------------------------|-----------|-----------|
|               |               |             | X                       | Y         | Z         |
| 1             | 47            | 0           | 0.745805                | -0.189113 | 0.018908  |
| 2             | 6             | 0           | -5.781976               | 4.035521  | -2.455178 |
| 3             | 6             | 0           | 0.647979                | -2.253207 | 2.460937  |
| 4             | 6             | 0           | -3.405474               | 4.624260  | -2.630207 |
| 5             | 6             | 0           | -2.272957               | 5.455639  | -2.009179 |
| 6             | 6             | 0           | -0.877064               | 4.831939  | -2.179156 |
| 7             | 6             | 0           | -0.027689               | 6.051546  | -2.563265 |
| 8             | 6             | 0           | 1.329090                | 0.479310  | 5.006467  |
| 9             | 6             | 0           | 2.300218                | 5.571976  | -2.195236 |
| 10            | 6             | 0           | 1.065067                | -0.785365 | 4.478265  |
| 11            | 6             | 0           | 1.468979                | 5.508053  | -4.546469 |
| 12            | 6             | 0           | -1.017468               | 6.816821  | -3.450465 |
| 13            | 6             | 0           | 0.939188                | -0.923988 | 3.096730  |
| 14            | 6             | 0           | 1.319744                | 1.331999  | 2.765445  |
| 15            | 6             | 0           | 1.456522                | 1.558029  | 4.138536  |
| 16            | 6             | 0           | -6.989822               | 4.890436  | -2.048098 |
| 17            | 6             | 0           | -6.009968               | 1.833796  | -4.315361 |
| 18            | 6             | 0           | -6.493472               | 0.237385  | -2.408727 |
| 19            | 6             | 0           | -5.433062               | -0.813506 | -2.782735 |
| 20            | 6             | 0           | -7.896283               | -0.156542 | -2.902799 |
| 21            | 6             | 0           | -8.281680               | -1.546866 | -2.377667 |
| 22            | 6             | 0           | -7.244069               | -2.603020 | -2.777485 |
| 23            | 6             | 0           | -5.821626               | -2.220519 | -2.295758 |
| 24            | 6             | 0           | -4.834493               | -3.267035 | -2.820879 |
| 25            | 6             | 0           | -6.489187               | 5.548111  | 2.166710  |
| 26            | 6             | 0           | -3.941318               | -5.519573 | -2.516439 |
| 27            | 6             | 0           | -4.562574               | -6.865384 | -2.109915 |
| 28            | 6             | 0           | -2.524364               | -5.402980 | -1.928425 |
| 29            | 6             | 0           | -5.431138               | 4.529140  | 2.610385  |
| 30            | 6             | 0           | -5.717505               | 2.109857  | 2.956237  |
| 31            | 6             | 0           | -1.602232               | -6.181953 | -4.104641 |
| 32            | 6             | 0           | -0.131209               | -5.589836 | -2.142933 |
| 33            | 6             | 0           | 0.792498                | -4.631379 | -2.903513 |
| 34            | 6             | 0           | -6.324012               | 0.825256  | 2.384819  |
| 35            | 6             | 0           | 0.783948                | -6.817004 | -2.013568 |
| 36            | 6             | 0           | -7.814384               | 0.784817  | 2.808564  |
| 37            | 6             | 0           | 2.089633                | -4.851865 | -2.121011 |
| 38            | 6             | 0           | 3.344518                | -4.384599 | -2.867927 |
| 39            | 6             | 0           | -8.494707               | -0.525145 | 2.393972  |
| 40            | 6             | 0           | -7.743104               | -1.744072 | 2.946925  |
| 41            | 6             | 0           | 5.745795                | -3.923297 | -2.633005 |
| 42            | 6             | 0           | 6.888473                | -4.840089 | -2.182931 |
| 43            | 6             | 0           | 6.003468                | -2.480723 | -2.142935 |
| 44            | 6             | 0           | -5.567177               | -0.413473 | 2.903777  |
| 45            | 6             | 0           | -6.272573               | -1.720488 | 2.495847  |
| 46            | 6             | 0           | 5.818542                | -1.712929 | -4.497032 |
| 47            | 6             | 0           | 6.361428                | -0.106622 | -2.614725 |
| 48            | 6             | 0           | 5.285726                | 0.933644  | -2.985386 |
| 49            | 6             | 0           | 7.754631                | 0.300028  | -3.126537 |
| 50            | 6             | 0           | 8.137781                | 1.691247  | -2.604435 |
| 51            | 6             | 0           | 7.085724                | 2.738230  | -2.988136 |
| 52            | 6             | 0           | 5.670663                | 2.342168  | -2.492718 |
| 53            | 6             | 0           | 4.691944                | 3.398841  | -3.007341 |

|     |   |   |           |           |           |
|-----|---|---|-----------|-----------|-----------|
| 54  | 6 | 0 | -5.330387 | -3.107485 | 4.399790  |
| 55  | 6 | 0 | -5.231753 | -3.888442 | 2.046524  |
| 56  | 6 | 0 | 3.768428  | 5.632268  | -2.630728 |
| 57  | 6 | 0 | 4.381673  | 6.931777  | -2.082390 |
| 58  | 6 | 0 | -1.790729 | 1.149927  | -3.466505 |
| 59  | 6 | 0 | -0.959267 | 1.110087  | -2.343485 |
| 60  | 6 | 0 | -0.330709 | -1.071866 | -2.793510 |
| 61  | 6 | 0 | -1.162239 | -1.126287 | -3.911450 |
| 62  | 6 | 0 | -1.900279 | 0.006926  | -4.253386 |
| 63  | 6 | 0 | 0.552492  | -2.226962 | -2.402762 |
| 64  | 6 | 0 | 4.958803  | 3.841854  | 1.888014  |
| 65  | 6 | 0 | 4.378042  | 5.168722  | 2.418406  |
| 66  | 6 | 0 | 1.945053  | 5.169256  | 2.778485  |
| 67  | 6 | 0 | 0.592597  | 5.591710  | 2.190575  |
| 68  | 6 | 0 | -0.558892 | 4.620081  | 2.504466  |
| 69  | 6 | 0 | -1.746620 | 5.601758  | 2.475401  |
| 70  | 6 | 0 | -5.314404 | -6.410550 | 2.063315  |
| 71  | 6 | 0 | -4.049475 | 4.969195  | 2.094086  |
| 72  | 6 | 0 | -4.537982 | -5.177096 | 2.539251  |
| 73  | 6 | 0 | -3.122948 | 4.730823  | 4.400495  |
| 74  | 6 | 0 | -1.146676 | 6.814965  | 3.198777  |
| 75  | 6 | 0 | -2.094715 | -5.103035 | 2.859728  |
| 76  | 6 | 0 | -0.752301 | -5.038015 | 2.113174  |
| 77  | 6 | 0 | 1.037548  | -6.568666 | 1.903663  |
| 78  | 6 | 0 | 5.272745  | 6.329859  | 1.963141  |
| 79  | 6 | 0 | 0.417383  | -4.607065 | 3.007636  |
| 80  | 6 | 0 | 1.593450  | -5.170796 | 2.205046  |
| 81  | 6 | 0 | 5.279757  | 3.109209  | 4.236991  |
| 82  | 6 | 0 | 6.110870  | 1.716989  | 2.291824  |
| 83  | 6 | 0 | 5.418304  | 0.403584  | 2.698595  |
| 84  | 6 | 0 | 7.587607  | 1.749960  | 2.723104  |
| 85  | 6 | 0 | 8.341347  | 0.531730  | 2.171850  |
| 86  | 6 | 0 | 7.673443  | -0.779029 | 2.603692  |
| 87  | 6 | 0 | 6.183575  | -0.828054 | 2.180807  |
| 88  | 6 | 0 | 5.569873  | -2.117947 | 2.732450  |
| 89  | 6 | 0 | 3.148088  | -5.195001 | 4.231549  |
| 90  | 6 | 0 | 3.946442  | -4.836971 | 1.900460  |
| 91  | 6 | 0 | 5.360682  | -4.541858 | 2.428545  |
| 92  | 6 | 0 | 6.334306  | -5.630798 | 1.963397  |
| 93  | 6 | 0 | -5.994518 | 2.591769  | -1.951863 |
| 94  | 7 | 0 | 1.306777  | 5.749712  | -3.104538 |
| 95  | 7 | 0 | -5.746149 | 3.190137  | 2.123346  |
| 96  | 7 | 0 | -6.118990 | 1.595078  | -2.869871 |
| 97  | 7 | 0 | -5.544711 | -2.926243 | 2.956773  |
| 98  | 7 | 0 | -4.757912 | -4.406090 | -2.068247 |
| 99  | 7 | 0 | -3.168088 | -5.159575 | 2.034423  |
| 100 | 7 | 0 | -1.461199 | -5.795016 | -2.697746 |
| 101 | 7 | 0 | 4.461932  | -4.370735 | -2.105674 |
| 102 | 7 | 0 | 2.930400  | -5.082450 | 2.783155  |
| 103 | 7 | 0 | 6.006560  | -1.473279 | -3.057666 |
| 104 | 7 | 0 | 5.768741  | -3.224308 | 1.955273  |
| 105 | 7 | 0 | 4.499786  | 4.464125  | -2.171511 |
| 106 | 7 | 0 | 5.383968  | 2.911998  | 2.784396  |
| 107 | 7 | 0 | -0.243000 | 0.025169  | -2.011761 |
| 108 | 7 | 0 | -4.548841 | 4.594381  | -1.910826 |
| 109 | 7 | 0 | 3.006789  | 5.346694  | 1.950860  |
| 110 | 7 | 0 | -3.021298 | 5.102782  | 2.981060  |
| 111 | 7 | 0 | 1.070402  | 0.120601  | 2.249939  |
| 112 | 8 | 0 | 4.196730  | 3.349267  | -4.135638 |

|     |   |   |           |           |           |
|-----|---|---|-----------|-----------|-----------|
| 113 | 8 | 0 | 5.023159  | -2.170172 | 3.836835  |
| 114 | 8 | 0 | 5.042791  | 3.684720  | 0.659529  |
| 115 | 8 | 0 | 3.748295  | -4.822554 | 0.680014  |
| 116 | 8 | 0 | -0.655258 | 3.501359  | 1.658595  |
| 117 | 8 | 0 | 0.229044  | 6.842290  | 2.790867  |
| 118 | 8 | 0 | -3.915652 | 5.218711  | 0.885495  |
| 119 | 8 | 0 | 6.194626  | -2.295336 | -0.929732 |
| 120 | 8 | 0 | -0.367494 | -6.359553 | 1.672542  |
| 121 | 8 | 0 | 3.299725  | -4.066699 | -4.058314 |
| 122 | 8 | 0 | 2.122417  | -6.289660 | -2.001796 |
| 123 | 8 | 0 | 0.176148  | -3.334989 | -3.037377 |
| 124 | 8 | 0 | -2.153093 | -5.082498 | 4.089763  |
| 125 | 8 | 0 | -2.379959 | -4.992368 | -0.771972 |
| 126 | 8 | 0 | -5.460233 | -3.769517 | 0.832285  |
| 127 | 8 | 0 | -4.231942 | -3.134168 | -3.888508 |
| 128 | 8 | 0 | -5.323155 | 2.175340  | 4.123470  |
| 129 | 8 | 0 | -6.081664 | 2.397732  | -0.730472 |
| 130 | 8 | 0 | -3.269230 | 4.100109  | -3.743846 |
| 131 | 8 | 0 | -0.419769 | 4.170983  | -1.001865 |
| 132 | 8 | 0 | -2.235252 | 6.716116  | -2.716045 |
| 133 | 8 | 0 | 2.041995  | 5.438246  | -0.978679 |
| 134 | 8 | 0 | 0.525204  | -3.216347 | 3.375511  |
| 135 | 8 | 0 | 1.476319  | -2.125502 | -1.616478 |
| 136 | 8 | 0 | 2.043067  | 4.746617  | 3.934315  |
| 137 | 8 | 0 | 0.535385  | -2.418770 | 1.257974  |
| 138 | 1 | 0 | -5.667373 | 4.070418  | -3.535771 |
| 139 | 1 | 0 | -2.474092 | 5.660288  | -0.954487 |
| 140 | 1 | 0 | -0.889338 | 4.120886  | -3.015277 |
| 141 | 1 | 0 | 0.130760  | 6.645076  | -1.658373 |
| 142 | 1 | 0 | 1.428108  | 0.613072  | 6.079438  |
| 143 | 1 | 0 | 0.953845  | -1.652594 | 5.115956  |
| 144 | 1 | 0 | 0.581042  | 4.989977  | -4.918346 |
| 145 | 1 | 0 | 1.585674  | 6.443702  | -5.105185 |
| 146 | 1 | 0 | 2.323743  | 4.853414  | -4.722098 |
| 147 | 1 | 0 | -1.125326 | 6.370663  | -4.448078 |
| 148 | 1 | 0 | -0.777359 | 7.877930  | -3.558330 |
| 149 | 1 | 0 | 1.373788  | 2.154452  | 2.064372  |
| 150 | 1 | 0 | 1.647194  | 2.568912  | 4.485364  |
| 151 | 1 | 0 | -7.903047 | 4.509850  | -2.518751 |
| 152 | 1 | 0 | -7.135558 | 4.864521  | -0.964615 |
| 153 | 1 | 0 | -6.841213 | 5.926367  | -2.366615 |
| 154 | 1 | 0 | -5.960914 | 0.870835  | -4.823449 |
| 155 | 1 | 0 | -5.098477 | 2.388376  | -4.550890 |
| 156 | 1 | 0 | -6.876981 | 2.375382  | -4.712313 |
| 157 | 1 | 0 | -6.528305 | 0.317381  | -1.320674 |
| 158 | 1 | 0 | -4.466978 | -0.519897 | -2.355129 |
| 159 | 1 | 0 | -5.292671 | -0.868412 | -3.868208 |
| 160 | 1 | 0 | -7.921492 | -0.168856 | -4.001516 |
| 161 | 1 | 0 | -8.623042 | 0.596228  | -2.573595 |
| 162 | 1 | 0 | -9.270648 | -1.829382 | -2.758095 |
| 163 | 1 | 0 | -8.366164 | -1.513398 | -1.281673 |
| 164 | 1 | 0 | -7.228711 | -2.707225 | -3.871657 |
| 165 | 1 | 0 | -7.517797 | -3.581684 | -2.367979 |
| 166 | 1 | 0 | -5.814678 | -2.252909 | -1.198506 |
| 167 | 1 | 0 | -7.476363 | 5.230222  | 2.514744  |
| 168 | 1 | 0 | -6.507262 | 5.647253  | 1.078357  |
| 169 | 1 | 0 | -6.274124 | 6.536191  | 2.588938  |
| 170 | 1 | 0 | -3.908028 | -5.438070 | -3.602477 |
| 171 | 1 | 0 | -3.980192 | -7.704297 | -2.506939 |

|     |   |   |           |           |           |
|-----|---|---|-----------|-----------|-----------|
| 172 | 1 | 0 | -5.582865 | -6.936582 | -2.497717 |
| 173 | 1 | 0 | -4.592762 | -6.967504 | -1.020607 |
| 174 | 1 | 0 | -5.443385 | 4.455784  | 3.695703  |
| 175 | 1 | 0 | -1.888302 | -5.329760 | -4.731304 |
| 176 | 1 | 0 | -0.646890 | -6.570993 | -4.460774 |
| 177 | 1 | 0 | -2.340538 | -6.978886 | -4.223433 |
| 178 | 1 | 0 | -0.300987 | -5.174461 | -1.149503 |
| 179 | 1 | 0 | 0.971443  | -4.943638 | -3.935069 |
| 180 | 1 | 0 | -6.274710 | 0.861139  | 1.289393  |
| 181 | 1 | 0 | 0.587493  | -7.370525 | -1.089376 |
| 182 | 1 | 0 | 0.683738  | -7.508237 | -2.860468 |
| 183 | 1 | 0 | -7.867317 | 0.896917  | 3.900078  |
| 184 | 1 | 0 | -8.340761 | 1.642837  | 2.373811  |
| 185 | 1 | 0 | 2.057042  | -4.395626 | -1.129750 |
| 186 | 1 | 0 | -9.534151 | -0.534176 | 2.743654  |
| 187 | 1 | 0 | -8.534126 | -0.588827 | 1.296480  |
| 188 | 1 | 0 | -7.800412 | -1.737694 | 4.044654  |
| 189 | 1 | 0 | -8.212685 | -2.674445 | 2.605293  |
| 190 | 1 | 0 | 5.654166  | -3.972695 | -3.715177 |
| 191 | 1 | 0 | 6.677951  | -5.871656 | -2.480010 |
| 192 | 1 | 0 | 7.832244  | -4.530454 | -2.645763 |
| 193 | 1 | 0 | 7.019442  | -4.797634 | -1.098484 |
| 194 | 1 | 0 | -4.540933 | -0.417433 | 2.514951  |
| 195 | 1 | 0 | -5.493063 | -0.317889 | 3.992529  |
| 196 | 1 | 0 | -6.254892 | -1.793149 | 1.406596  |
| 197 | 1 | 0 | 4.918413  | -2.303847 | -4.680744 |
| 198 | 1 | 0 | 5.698004  | -0.751937 | -4.995968 |
| 199 | 1 | 0 | 6.684237  | -2.215356 | -4.945294 |
| 200 | 1 | 0 | 6.409527  | -0.175165 | -1.526055 |
| 201 | 1 | 0 | 4.324211  | 0.629428  | -2.552355 |
| 202 | 1 | 0 | 5.139304  | 0.992156  | -4.069397 |
| 203 | 1 | 0 | 7.763167  | 0.311451  | -4.225539 |
| 204 | 1 | 0 | 8.490171  | -0.448113 | -2.807030 |
| 205 | 1 | 0 | 9.118486  | 1.984284  | -2.998267 |
| 206 | 1 | 0 | 8.238391  | 1.655658  | -1.509686 |
| 207 | 1 | 0 | 7.054484  | 2.845459  | -4.081048 |
| 208 | 1 | 0 | 7.354995  | 3.718994  | -2.578635 |
| 209 | 1 | 0 | 5.671271  | 2.365788  | -1.395760 |
| 210 | 1 | 0 | -5.536182 | -2.163619 | 4.903012  |
| 211 | 1 | 0 | -6.000340 | -3.865534 | 4.822410  |
| 212 | 1 | 0 | -4.295981 | -3.384213 | 4.618205  |
| 213 | 1 | 0 | 3.852312  | 5.635977  | -3.715700 |
| 214 | 1 | 0 | 5.435562  | 6.987370  | -2.369663 |
| 215 | 1 | 0 | 4.307852  | 6.974622  | -0.992400 |
| 216 | 1 | 0 | 3.863975  | 7.806280  | -2.491304 |
| 217 | 1 | 0 | -2.340278 | 2.058877  | -3.696020 |
| 218 | 1 | 0 | -0.855737 | 1.972070  | -1.691395 |
| 219 | 1 | 0 | -1.231401 | -2.037633 | -4.490037 |
| 220 | 1 | 0 | -2.551965 | -0.011791 | -5.121146 |
| 221 | 1 | 0 | 4.312933  | 5.176967  | 3.503215  |
| 222 | 1 | 0 | 0.677520  | 5.723521  | 1.104013  |
| 223 | 1 | 0 | -0.407640 | 4.227549  | 3.515330  |
| 224 | 1 | 0 | -1.929852 | 5.871765  | 1.434555  |
| 225 | 1 | 0 | -4.782540 | -7.320725 | 2.355385  |
| 226 | 1 | 0 | -5.437878 | -6.397546 | 0.977459  |
| 227 | 1 | 0 | -6.313275 | -6.431857 | 2.514035  |
| 228 | 1 | 0 | -4.448985 | -5.210703 | 3.622357  |
| 229 | 1 | 0 | -2.117478 | 4.559496  | 4.788473  |
| 230 | 1 | 0 | -3.583728 | 5.527780  | 4.996738  |



|     |   |   |           |           |           |
|-----|---|---|-----------|-----------|-----------|
| 231 | 1 | 0 | -3.692188 | 3.806924  | 4.521318  |
| 232 | 1 | 0 | -1.208194 | 6.719461  | 4.291466  |
| 233 | 1 | 0 | -1.614493 | 7.760439  | 2.906534  |
| 234 | 1 | 0 | -0.849799 | -4.384444 | 1.242596  |
| 235 | 1 | 0 | 1.182919  | -7.256214 | 2.749065  |
| 236 | 1 | 0 | 1.491170  | -7.003550 | 1.008882  |
| 237 | 1 | 0 | 6.277711  | 6.227019  | 2.387446  |
| 238 | 1 | 0 | 5.370806  | 6.343680  | 0.874197  |
| 239 | 1 | 0 | 4.850724  | 7.281393  | 2.299587  |
| 240 | 1 | 0 | 0.285369  | -5.093412 | 3.975437  |
| 241 | 1 | 0 | 1.650157  | -4.628396 | 1.262380  |
| 242 | 1 | 0 | 5.490239  | 2.161638  | 4.732111  |
| 243 | 1 | 0 | 6.000147  | 3.848639  | 4.606817  |
| 244 | 1 | 0 | 4.270241  | 3.417514  | 4.516874  |
| 245 | 1 | 0 | 6.072618  | 1.800942  | 1.204055  |
| 246 | 1 | 0 | 5.340247  | 0.311544  | 3.787558  |
| 247 | 1 | 0 | 4.392664  | 0.399928  | 2.308348  |
| 248 | 1 | 0 | 8.048220  | 2.681378  | 2.371419  |
| 249 | 1 | 0 | 7.659802  | 1.750109  | 3.819656  |
| 250 | 1 | 0 | 8.369338  | 0.584062  | 1.073717  |
| 251 | 1 | 0 | 9.383784  | 0.552336  | 2.511719  |
| 252 | 1 | 0 | 8.203032  | -1.636608 | 2.174019  |
| 253 | 1 | 0 | 7.733552  | -0.880071 | 3.696614  |
| 254 | 1 | 0 | 6.143119  | -0.861143 | 1.084854  |
| 255 | 1 | 0 | 3.898854  | -5.957436 | 4.458687  |
| 256 | 1 | 0 | 2.218703  | -5.506991 | 4.707888  |
| 257 | 1 | 0 | 3.462989  | -4.236524 | 4.655780  |
| 258 | 1 | 0 | 5.369506  | -4.476329 | 3.514901  |
| 259 | 1 | 0 | 7.349105  | -5.390202 | 2.293486  |
| 260 | 1 | 0 | 6.054845  | -6.604042 | 2.382737  |
| 261 | 1 | 0 | 6.325912  | -5.722458 | 0.873553  |
| 262 | 1 | 0 | -5.932267 | 3.057748  | 1.129089  |
| 263 | 1 | 0 | -5.030654 | -4.362519 | -1.086321 |
| 264 | 1 | 0 | -3.025962 | -5.111089 | 1.024295  |
| 265 | 1 | 0 | 4.375677  | -4.535119 | -1.102101 |
| 266 | 1 | 0 | 5.989668  | -3.099211 | 0.966631  |
| 267 | 1 | 0 | 4.729940  | 4.375251  | -1.181495 |
| 268 | 1 | 0 | -4.530701 | 4.896151  | -0.935128 |
| 269 | 1 | 0 | 2.845941  | 5.546768  | 0.965665  |
| 270 | 1 | 0 | -0.850610 | 3.799046  | 0.745923  |
| 271 | 1 | 0 | 0.511407  | 4.459131  | -0.857415 |

---

**Anti-eclipsed dimer**

|    | 1 | 6 | 0         | -5.387776 | -0.955010 | -3.136076 |
|----|---|---|-----------|-----------|-----------|-----------|
| 2  | 6 | 0 | 5.480198  | 3.116242  | 4.348196  |           |
| 3  | 6 | 0 | 3.662393  | -4.386280 | -3.029401 |           |
| 4  | 6 | 0 | 2.351676  | -4.727118 | -2.295421 |           |
| 5  | 6 | 0 | 1.123014  | -4.294475 | -3.098874 |           |
| 6  | 6 | 0 | 0.045984  | -5.193872 | -2.490481 |           |
| 7  | 6 | 0 | -3.299278 | 4.828267  | 4.232950  |           |
| 8  | 6 | 0 | -2.310339 | -5.553279 | -2.278560 |           |
| 9  | 6 | 0 | -5.196808 | -3.275313 | 4.121662  |           |
| 10 | 6 | 0 | 0.837204  | -6.516682 | -2.467108 |           |
| 11 | 6 | 0 | 1.490320  | 1.157781  | -3.736160 |           |
| 12 | 6 | 0 | 1.341026  | -0.217391 | -3.544760 |           |
| 13 | 6 | 0 | 0.760354  | -0.669921 | -2.359696 |           |
| 14 | 6 | 0 | 7.175486  | -4.813252 | -2.240769 |           |
| 15 | 6 | 0 | 6.289164  | -2.449338 | -2.196173 |           |
| 16 | 6 | 0 | 0.431975  | 1.489087  | -1.600166 |           |
| 17 | 6 | 0 | 1.014555  | 2.018878  | -2.754446 |           |
| 18 | 6 | 0 | 6.553516  | -0.049735 | -2.601221 |           |
| 19 | 6 | 0 | 7.891437  | 0.499800  | -3.123281 |           |
| 20 | 6 | 0 | 8.150248  | 1.903071  | -2.556186 |           |
| 21 | 6 | 0 | 7.000750  | 2.862128  | -2.888793 |           |
| 22 | 6 | 0 | 5.379964  | 0.899246  | -2.910225 |           |
| 23 | 6 | 0 | 5.636235  | 2.324463  | -2.385770 |           |
| 24 | 6 | 0 | 4.545858  | 3.288820  | -2.862538 |           |
| 25 | 6 | 0 | 3.213977  | -4.956738 | 4.081913  |           |
| 26 | 6 | 0 | -0.565997 | 1.979656  | 2.845839  |           |
| 27 | 6 | 0 | 3.503995  | 5.474887  | -2.487132 |           |
| 28 | 6 | 0 | 4.207389  | 6.818941  | -2.224282 |           |
| 29 | 6 | 0 | 2.147537  | 5.483096  | -1.763056 |           |
| 30 | 6 | 0 | -1.419992 | -0.474277 | 5.619783  |           |
| 31 | 6 | 0 | -1.118267 | 0.726349  | 4.974003  |           |
| 32 | 6 | 0 | -0.221859 | 6.060808  | -1.734840 |           |
| 33 | 6 | 0 | -0.918215 | 7.402655  | -2.085649 |           |
| 34 | 6 | 0 | -0.861966 | 0.712210  | 3.602446  |           |
| 35 | 6 | 0 | -1.329518 | 5.005132  | -2.033467 |           |
| 36 | 6 | 0 | -2.594063 | 5.885451  | -2.164042 |           |
| 37 | 6 | 0 | -3.680743 | 5.239806  | -3.025815 |           |
| 38 | 6 | 0 | -1.185757 | -1.575422 | 3.504091  |           |
| 39 | 6 | 0 | -1.459702 | -1.645328 | 4.871839  |           |
| 40 | 6 | 0 | -5.720393 | 3.881281  | -2.990583 |           |
| 41 | 6 | 0 | -7.051305 | 4.654059  | -2.903442 |           |
| 42 | 6 | 0 | -5.904650 | 2.489090  | -2.366768 |           |
| 43 | 6 | 0 | -6.393542 | 0.100876  | -2.641590 |           |
| 44 | 6 | 0 | -7.850836 | -0.323762 | -2.895794 |           |
| 45 | 6 | 0 | -8.133207 | -1.700178 | -2.277074 |           |
| 46 | 6 | 0 | -7.148802 | -2.759117 | -2.788844 |           |
| 47 | 6 | 0 | 0.647443  | -2.133131 | -2.060204 |           |
| 48 | 6 | 0 | -5.679400 | -2.341371 | -2.533343 |           |
| 49 | 6 | 0 | -4.757289 | -3.400316 | -3.142589 |           |
| 50 | 6 | 0 | 6.430380  | -5.529553 | 1.809184  |           |
| 51 | 6 | 0 | -3.747954 | -5.622363 | -2.823220 |           |
| 52 | 6 | 0 | -4.406945 | -6.939057 | -2.396994 |           |
| 53 | 6 | 0 | -1.438632 | -5.055791 | -4.567257 |           |
| 54 | 6 | 0 | 6.146156  | -1.635235 | -4.538279 |           |
| 55 | 6 | 0 | 1.036073  | 6.062794  | -3.922683 |           |
| 56 | 6 | 0 | 5.462940  | -4.438430 | 2.290393  |           |
| 57 | 6 | 0 | -6.126927 | 1.598000  | -4.667647 |           |

|     |   |   |           |           |           |
|-----|---|---|-----------|-----------|-----------|
| 58  | 6 | 0 | 6.049864  | -3.887068 | -2.711591 |
| 59  | 6 | 0 | -4.347967 | -5.314492 | 2.241791  |
| 60  | 6 | 0 | 5.781664  | -2.045622 | 2.698181  |
| 61  | 6 | 0 | -1.910339 | -5.194146 | 2.537743  |
| 62  | 6 | 0 | -0.558601 | -5.527724 | 1.890354  |
| 63  | 6 | 0 | 0.582804  | -4.602181 | 2.323002  |
| 64  | 6 | 0 | 1.788603  | -5.525482 | 2.071786  |
| 65  | 6 | 0 | 6.419358  | -0.750736 | 2.187844  |
| 66  | 6 | 0 | 4.055958  | -4.745360 | 1.749185  |
| 67  | 6 | 0 | 5.657334  | 0.474084  | 2.727355  |
| 68  | 6 | 0 | 1.245847  | -6.868958 | 2.587145  |
| 69  | 6 | 0 | 7.901432  | -0.728057 | 2.638510  |
| 70  | 6 | 0 | 8.589076  | 0.590229  | 2.263082  |
| 71  | 6 | 0 | 7.837370  | 1.797155  | 2.842092  |
| 72  | 6 | 0 | -5.223218 | -6.479023 | 1.759499  |
| 73  | 6 | 0 | -4.960062 | -3.983394 | 1.752566  |
| 74  | 6 | 0 | 6.370324  | 1.793554  | 2.379052  |
| 75  | 6 | 0 | 5.212833  | 3.920244  | 2.013759  |
| 76  | 6 | 0 | -6.141977 | -1.890669 | 2.225653  |
| 77  | 6 | 0 | -7.592646 | -1.943276 | 2.736813  |
| 78  | 6 | 0 | -8.395313 | -0.743138 | 2.215300  |
| 79  | 6 | 0 | -7.727632 | 0.583680  | 2.595712  |
| 80  | 6 | 0 | -5.452314 | -0.562817 | 2.591761  |
| 81  | 6 | 0 | -6.261222 | 0.653284  | 2.099765  |
| 82  | 6 | 0 | -5.651778 | 1.958359  | 2.615561  |
| 83  | 6 | 0 | -5.373481 | 4.360606  | 2.211362  |
| 84  | 6 | 0 | -6.242417 | 5.440555  | 1.555726  |
| 85  | 6 | 0 | -3.898038 | 4.565393  | 1.832939  |
| 86  | 6 | 0 | 5.217665  | 6.441457  | 2.044580  |
| 87  | 6 | 0 | -1.580868 | 4.880714  | 2.340787  |
| 88  | 6 | 0 | -1.077131 | 6.305011  | 2.063521  |
| 89  | 6 | 0 | 4.515894  | 5.183408  | 2.568528  |
| 90  | 6 | 0 | -0.429309 | 4.388134  | 3.227812  |
| 91  | 6 | 0 | 2.109639  | 4.867031  | 3.020170  |
| 92  | 6 | 0 | 0.739189  | 4.832179  | 2.335615  |
| 93  | 1 | 0 | -2.158518 | 4.129232  | -0.474399 |
| 94  | 1 | 0 | -2.833591 | -5.686533 | 0.768422  |
| 95  | 1 | 0 | -4.704481 | -4.405545 | -1.335266 |
| 96  | 1 | 0 | -5.944512 | 2.877475  | 0.784105  |
| 97  | 1 | 0 | -4.564199 | 4.494772  | -1.300130 |
| 98  | 1 | 0 | 4.674783  | 4.342891  | -1.088438 |
| 99  | 1 | 0 | 2.904585  | 5.219597  | 1.162384  |
| 100 | 1 | 0 | 6.138009  | -2.968269 | 0.880324  |
| 101 | 1 | 0 | 4.615318  | -4.440279 | -1.211254 |
| 102 | 1 | 0 | 0.799662  | 4.218590  | 1.431637  |
| 103 | 1 | 0 | -0.349611 | 4.936813  | 4.167971  |
| 104 | 1 | 0 | 4.508339  | 5.203027  | 3.655716  |
| 105 | 1 | 0 | -1.340373 | 6.993414  | 2.878610  |
| 106 | 1 | 0 | -1.469298 | 6.709186  | 1.125003  |
| 107 | 1 | 0 | -1.521377 | 4.321597  | 1.410560  |
| 108 | 1 | 0 | 5.250122  | 6.439667  | 0.951695  |
| 109 | 1 | 0 | 6.249515  | 6.485463  | 2.410755  |
| 110 | 1 | 0 | 4.688145  | 7.334901  | 2.388017  |
| 111 | 1 | 0 | -6.135515 | 5.424332  | 0.467434  |
| 112 | 1 | 0 | -7.292659 | 5.272113  | 1.810715  |
| 113 | 1 | 0 | -5.956150 | 6.437180  | 1.909523  |
| 114 | 1 | 0 | -5.510833 | 4.387054  | 3.290620  |
| 115 | 1 | 0 | -6.267855 | 0.675540  | 1.001944  |
| 116 | 1 | 0 | -5.331437 | -0.460567 | 3.676109  |

|     |   |   |           |           |           |
|-----|---|---|-----------|-----------|-----------|
| 117 | 1 | 0 | -4.444886 | -0.546438 | 2.156720  |
| 118 | 1 | 0 | -8.293375 | 1.428222  | 2.185397  |
| 119 | 1 | 0 | -7.730609 | 0.697920  | 3.688396  |
| 120 | 1 | 0 | -8.484371 | -0.809818 | 1.121338  |
| 121 | 1 | 0 | -9.416802 | -0.775136 | 2.612699  |
| 122 | 1 | 0 | -8.056562 | -2.884691 | 2.418220  |
| 123 | 1 | 0 | -7.606299 | -1.933982 | 3.835580  |
| 124 | 1 | 0 | -6.162200 | -1.976473 | 1.137497  |
| 125 | 1 | 0 | 6.359248  | 1.915290  | 1.294072  |
| 126 | 1 | 0 | -5.323135 | -6.466335 | 0.670812  |
| 127 | 1 | 0 | -6.228150 | -6.406494 | 2.189862  |
| 128 | 1 | 0 | -4.781328 | -7.430620 | 2.069001  |
| 129 | 1 | 0 | 7.887498  | 1.758743  | 3.939221  |
| 130 | 1 | 0 | 8.314188  | 2.734995  | 2.531925  |
| 131 | 1 | 0 | 9.625719  | 0.587804  | 2.620996  |
| 132 | 1 | 0 | 8.637069  | 0.680253  | 1.167869  |
| 133 | 1 | 0 | 7.938388  | -0.865165 | 3.728174  |
| 134 | 1 | 0 | 8.432265  | -1.576540 | 2.191477  |
| 135 | 1 | 0 | 1.685845  | -7.726767 | 2.067836  |
| 136 | 1 | 0 | 0.690841  | -3.445503 | 0.725804  |
| 137 | 1 | 0 | 1.410023  | -6.996656 | 3.665420  |
| 138 | 1 | 0 | 6.154982  | 3.876196  | 4.759993  |
| 139 | 1 | 0 | 4.450152  | 3.366149  | 4.613276  |
| 140 | 1 | 0 | 5.725286  | 2.164393  | 4.818364  |
| 141 | 1 | 0 | 2.366226  | -4.263551 | -1.302979 |
| 142 | 1 | 0 | 1.322770  | -4.525490 | -4.145857 |
| 143 | 1 | 0 | -0.126742 | -4.883816 | -1.463108 |
| 144 | 1 | 0 | -3.882707 | 5.727281  | 4.457724  |
| 145 | 1 | 0 | -3.854116 | 3.936388  | 4.534979  |
| 146 | 1 | 0 | -2.377123 | 4.878029  | 4.810440  |
| 147 | 1 | 0 | -5.362854 | -2.324498 | 4.628499  |
| 148 | 1 | 0 | -4.178973 | -3.601603 | 4.344308  |
| 149 | 1 | 0 | -5.910715 | -4.002135 | 4.527930  |
| 150 | 1 | 0 | 0.804763  | -7.018414 | -3.444492 |
| 151 | 1 | 0 | 0.465885  | -7.204419 | -1.702793 |
| 152 | 1 | 0 | 1.990784  | 1.549322  | -4.614524 |
| 153 | 1 | 0 | 1.689546  | -0.933200 | -4.278572 |
| 154 | 1 | 0 | 6.962150  | -5.843129 | -2.541557 |
| 155 | 1 | 0 | 8.128848  | -4.511215 | -2.688721 |
| 156 | 1 | 0 | 7.288706  | -4.770562 | -1.154770 |
| 157 | 1 | 0 | 0.042064  | 2.141889  | -0.829083 |
| 158 | 1 | 0 | 1.104791  | 3.092646  | -2.857541 |
| 159 | 1 | 0 | 6.634096  | -0.155853 | -1.517806 |
| 160 | 1 | 0 | 8.700836  | -0.185321 | -2.843549 |
| 161 | 1 | 0 | 7.878564  | 0.551756  | -4.220975 |
| 162 | 1 | 0 | 9.093440  | 2.299015  | -2.951486 |
| 163 | 1 | 0 | 8.270801  | 1.839781  | -1.464847 |
| 164 | 1 | 0 | 6.942343  | 3.001317  | -3.977399 |
| 165 | 1 | 0 | 7.188809  | 3.848409  | -2.449572 |
| 166 | 1 | 0 | 5.203078  | 0.971660  | -3.989259 |
| 167 | 1 | 0 | 4.462403  | 0.492724  | -2.466689 |
| 168 | 1 | 0 | 5.653387  | 2.325282  | -1.288285 |
| 169 | 1 | 0 | 3.690889  | -4.006215 | 4.332107  |
| 170 | 1 | 0 | 2.221513  | -4.966839 | 4.535261  |
| 171 | 1 | 0 | 3.789233  | -5.783762 | 4.514549  |
| 172 | 1 | 0 | 3.378053  | 5.334631  | -3.559436 |
| 173 | 1 | 0 | 3.611847  | 7.654726  | -2.608651 |
| 174 | 1 | 0 | 4.354436  | 6.976358  | -1.150944 |
| 175 | 1 | 0 | 5.182537  | 6.831422  | -2.719612 |

|     |   |   |           |           |           |
|-----|---|---|-----------|-----------|-----------|
| 176 | 1 | 0 | -1.619389 | -0.484384 | 6.687081  |
| 177 | 1 | 0 | -1.078888 | 1.661521  | 5.516482  |
| 178 | 1 | 0 | 0.045723  | 6.014389  | -0.679836 |
| 179 | 1 | 0 | -0.329035 | 8.059053  | -2.729813 |
| 180 | 1 | 0 | -1.157032 | 7.954197  | -1.162983 |
| 181 | 1 | 0 | -1.134535 | 4.550273  | -3.012155 |
| 182 | 1 | 0 | -2.988167 | 6.107027  | -1.159100 |
| 183 | 1 | 0 | -1.180984 | -2.469068 | 2.897929  |
| 184 | 1 | 0 | -1.686312 | -2.612508 | 5.306850  |
| 185 | 1 | 0 | -5.410118 | 3.827135  | -4.033003 |
| 186 | 1 | 0 | -7.844600 | 4.141314  | -3.460310 |
| 187 | 1 | 0 | -7.372840 | 4.746021  | -1.860796 |
| 188 | 1 | 0 | -6.923194 | 5.654503  | -3.326296 |
| 189 | 1 | 0 | -6.260366 | 0.225336  | -1.565058 |
| 190 | 1 | 0 | -8.526974 | 0.433692  | -2.481015 |
| 191 | 1 | 0 | -8.047417 | -0.371020 | -3.975966 |
| 192 | 1 | 0 | -9.162904 | -2.005732 | -2.498339 |
| 193 | 1 | 0 | -8.056442 | -1.631092 | -1.182017 |
| 194 | 1 | 0 | -7.291222 | -2.905092 | -3.868677 |
| 195 | 1 | 0 | -7.344305 | -3.724183 | -2.307464 |
| 196 | 1 | 0 | -5.415507 | -1.053316 | -4.226759 |
| 197 | 1 | 0 | -4.370644 | -0.635452 | -2.876436 |
| 198 | 1 | 0 | -5.517858 | -2.318792 | -1.448180 |
| 199 | 1 | 0 | 6.135463  | -6.507580 | 2.205711  |
| 200 | 1 | 0 | 7.443214  | -5.305882 | 2.157032  |
| 201 | 1 | 0 | 6.434278  | -5.598370 | 0.718158  |
| 202 | 1 | 0 | -3.771250 | -5.547194 | -3.908098 |
| 203 | 1 | 0 | -3.874886 | -7.793639 | -2.829845 |
| 204 | 1 | 0 | -5.442864 | -6.963297 | -2.747396 |
| 205 | 1 | 0 | -4.392398 | -7.053341 | -1.310185 |
| 206 | 1 | 0 | -2.329998 | -4.460095 | -4.774298 |
| 207 | 1 | 0 | -0.582148 | -4.506379 | -4.957240 |
| 208 | 1 | 0 | -1.497356 | -6.014206 | -5.096941 |
| 209 | 1 | 0 | 5.265467  | -2.241971 | -4.762273 |
| 210 | 1 | 0 | 7.032505  | -2.109729 | -4.975693 |
| 211 | 1 | 0 | 6.017741  | -0.665586 | -5.018725 |
| 212 | 1 | 0 | 1.595869  | 6.964522  | -4.196911 |
| 213 | 1 | 0 | 0.004332  | 6.192245  | -4.255690 |
| 214 | 1 | 0 | 1.460930  | 5.209316  | -4.458311 |
| 215 | 1 | 0 | 5.471756  | -4.410080 | 3.377509  |
| 216 | 1 | 0 | -6.859347 | 2.344608  | -4.988822 |
| 217 | 1 | 0 | -5.141938 | 1.874377  | -5.057378 |
| 218 | 1 | 0 | -6.408690 | 0.647721  | -5.119148 |
| 219 | 1 | 0 | 5.983247  | -3.927580 | -3.795982 |
| 220 | 1 | 0 | -4.276166 | -5.350096 | 3.325967  |
| 221 | 1 | 0 | -0.664862 | -5.515471 | 0.796621  |
| 222 | 1 | 0 | 0.465889  | -4.394551 | 3.390978  |
| 223 | 1 | 0 | 1.946570  | -5.598802 | 0.993438  |
| 224 | 1 | 0 | 6.396561  | -0.753302 | 1.090526  |
| 225 | 1 | 0 | 5.556551  | 0.346965  | 3.810781  |
| 226 | 1 | 0 | 4.639418  | 0.494865  | 2.317598  |
| 227 | 7 | 0 | 4.743233  | -4.318028 | -2.218405 |
| 228 | 7 | 0 | 5.890452  | -3.116012 | 1.858652  |
| 229 | 7 | 0 | -1.275291 | -5.240381 | -3.116703 |
| 230 | 7 | 0 | 5.636696  | 2.973280  | 2.892740  |
| 231 | 7 | 0 | 0.325411  | 0.168255  | -1.396007 |
| 232 | 7 | 0 | 3.116658  | 5.142348  | 2.158577  |
| 233 | 7 | 0 | 6.294866  | -1.424275 | -3.090432 |
| 234 | 7 | 0 | 4.323423  | 4.358047  | -2.046053 |

|     |    |   |           |           |           |
|-----|----|---|-----------|-----------|-----------|
| 235 | 7  | 0 | 1.032290  | 5.834093  | -2.470169 |
| 236 | 7  | 0 | -2.960573 | 4.748435  | 2.802409  |
| 237 | 7  | 0 | -4.643584 | 4.585271  | -2.310036 |
| 238 | 7  | 0 | -5.784056 | 3.029985  | 1.780304  |
| 239 | 7  | 0 | -6.112263 | 1.439933  | -3.207332 |
| 240 | 7  | 0 | -5.371076 | -3.072204 | 2.677341  |
| 241 | 7  | 0 | -4.488326 | -4.464830 | -2.330885 |
| 242 | 7  | 0 | -2.981485 | -5.451624 | 1.750463  |
| 243 | 7  | 0 | 3.068839  | -5.092171 | 2.624833  |
| 244 | 7  | 0 | -0.888642 | -0.428020 | 2.879645  |
| 245 | 8  | 0 | -4.354707 | -3.329133 | -4.306004 |
| 246 | 8  | 0 | -5.086125 | -3.803876 | 0.531472  |
| 247 | 8  | 0 | -1.422809 | 3.954167  | -1.095253 |
| 248 | 8  | 0 | -5.166050 | 2.052577  | 3.746007  |
| 249 | 8  | 0 | 0.620922  | -3.342266 | 1.690348  |
| 250 | 8  | 0 | 3.870563  | -4.720088 | 0.523526  |
| 251 | 8  | 0 | -0.166076 | -6.838320 | 2.322202  |
| 252 | 8  | 0 | -5.905137 | 2.376518  | -1.130490 |
| 253 | 8  | 0 | -3.600038 | 4.542821  | 0.623215  |
| 254 | 8  | 0 | -3.648794 | 5.288412  | -4.248653 |
| 255 | 8  | 0 | -2.119419 | 7.067593  | -2.780269 |
| 256 | 8  | 0 | 0.350641  | 6.177563  | 1.978065  |
| 257 | 8  | 0 | 2.106933  | 5.230817  | -0.553289 |
| 258 | 8  | 0 | -0.518025 | 3.024586  | 3.676558  |
| 259 | 8  | 0 | 3.978690  | 3.155850  | -3.952431 |
| 260 | 8  | 0 | 2.239804  | 4.647404  | 4.225204  |
| 261 | 8  | 0 | 6.443018  | -2.280590 | -0.976338 |
| 262 | 8  | 0 | 5.348114  | 3.813224  | 0.783956  |
| 263 | 8  | 0 | 3.677406  | -4.164819 | -4.242329 |
| 264 | 8  | 0 | 0.912960  | -2.866276 | -3.137779 |
| 265 | 8  | 0 | 2.189338  | -6.145726 | -2.148489 |
| 266 | 8  | 0 | -2.120557 | -5.765349 | -1.071716 |
| 267 | 8  | 0 | 5.284806  | -2.130704 | 3.824062  |
| 268 | 8  | 0 | -1.991237 | -4.752890 | 3.690027  |
| 269 | 8  | 0 | 0.361046  | -2.573422 | -0.955897 |
| 270 | 8  | 0 | -0.402850 | 2.037634  | 1.640282  |
| 271 | 47 | 0 | -0.302711 | -0.482973 | 0.691518  |

---

### Clockwise alternating dimer

| Center<br>Number | Atomic<br>Number | Atomic<br>Type | Coordinates (Angstroms) |           |           |
|------------------|------------------|----------------|-------------------------|-----------|-----------|
|                  |                  |                | X                       | Y         | Z         |
| 1                | 47               | 0              | 0.510593                | -1.809849 | -2.080444 |
| 2                | 6                | 0              | 4.279597                | 5.271016  | 2.563575  |
| 3                | 6                | 0              | -2.602003               | -1.373810 | -3.099635 |
| 4                | 6                | 0              | 1.827602                | 5.307668  | 2.532936  |
| 5                | 6                | 0              | 0.616626                | 5.930012  | 1.826648  |
| 6                | 6                | 0              | -0.661736               | 5.071284  | 1.874243  |
| 7                | 6                | 0              | -1.715448               | 6.093595  | 2.341645  |
| 8                | 6                | 0              | -1.586243               | -1.725562 | -6.745955 |
| 9                | 6                | 0              | -3.917427               | 5.187518  | 2.001785  |
| 10               | 6                | 0              | -2.380163               | -1.488472 | -5.623746 |
| 11               | 6                | 0              | -3.034200               | 5.266145  | 4.340110  |
| 12               | 6                | 0              | -0.881451               | 6.991000  | 3.264789  |
| 13               | 6                | 0              | -1.790521               | -1.541231 | -4.359047 |
| 14               | 6                | 0              | 0.270078                | -2.066596 | -5.265624 |
| 15               | 6                | 0              | -0.239173               | -2.026371 | -6.565402 |
| 16               | 6                | 0              | 5.285399                | 6.383582  | 2.220859  |
| 17               | 6                | 0              | 5.060153                | 3.312063  | 4.544868  |
| 18               | 6                | 0              | 6.282239                | 1.987359  | 2.762456  |
| 19               | 6                | 0              | 5.770023                | 0.589042  | 3.154662  |
| 20               | 6                | 0              | 7.685662                | 2.259188  | 3.331688  |
| 21               | 6                | 0              | 8.670837                | 1.185988  | 2.845125  |
| 22               | 6                | 0              | 8.185675                | -0.224279 | 3.200021  |
| 23               | 6                | 0              | 6.759105                | -0.498718 | 2.673879  |
| 24               | 6                | 0              | 6.323398                | -1.884471 | 3.160156  |
| 25               | 6                | 0              | -7.041655               | 4.497414  | -2.222015 |
| 26               | 6                | 0              | 5.781995                | -4.205023 | 2.457188  |
| 27               | 6                | 0              | 6.789673                | -5.067499 | 1.691870  |
| 28               | 6                | 0              | 4.337246                | -4.591565 | 2.068855  |
| 29               | 6                | 0              | -5.734862               | 3.749051  | -2.520687 |
| 30               | 6                | 0              | -3.532140               | 4.727903  | -3.005708 |
| 31               | 6                | 0              | 3.446678                | -3.629295 | 4.229416  |
| 32               | 6                | 0              | 1.968067                | -4.588928 | 2.446018  |
| 33               | 6                | 0              | 0.829357                | -3.669915 | 2.888254  |
| 34               | 6                | 0              | 1.395248                | -5.934695 | 2.914117  |
| 35               | 6                | 0              | -2.407452               | 5.628814  | -2.491747 |
| 36               | 6                | 0              | -0.417855               | -4.487952 | 2.522176  |
| 37               | 6                | 0              | -1.566562               | -4.246048 | 3.521121  |
| 38               | 6                | 0              | -2.695525               | 7.076110  | -2.960595 |
| 39               | 6                | 0              | -1.573692               | 8.033507  | -2.542667 |
| 40               | 6                | 0              | -3.977514               | -4.468695 | 3.863220  |
| 41               | 6                | 0              | -4.825744               | -5.741779 | 3.989906  |
| 42               | 6                | 0              | -4.796249               | -3.357886 | 3.172443  |
| 43               | 6                | 0              | -0.211876               | 7.556315  | -3.065187 |
| 44               | 6                | 0              | -1.037244               | 5.141505  | -3.006921 |
| 45               | 6                | 0              | -5.029573               | -2.272107 | 5.387057  |
| 46               | 6                | 0              | -6.076759               | -1.275135 | 3.300561  |
| 47               | 6                | 0              | -5.459850               | 0.118887  | 3.527288  |
| 48               | 6                | 0              | -7.548461               | -1.330235 | 3.745540  |
| 49               | 6                | 0              | -8.369306               | -0.237470 | 3.045145  |
| 50               | 6                | 0              | -7.772157               | 1.154927  | 3.286992  |
| 51               | 6                | 0              | -6.287906               | 1.230323  | 2.852970  |
| 52               | 6                | 0              | -5.751708               | 2.610180  | 3.233690  |
| 53               | 6                | 0              | 0.082706                | 6.116914  | -2.601803 |

|     |   |   |           |           |           |
|-----|---|---|-----------|-----------|-----------|
| 54  | 6 | 0 | 1.651994  | 5.511002  | -4.505831 |
| 55  | 6 | 0 | -5.350871 | 4.911788  | 2.474902  |
| 56  | 6 | 0 | -6.308601 | 5.875454  | 1.758749  |
| 57  | 6 | 0 | 1.337378  | 2.107938  | 0.252358  |
| 58  | 6 | 0 | 1.188524  | 1.126574  | -0.730956 |
| 59  | 6 | 0 | 2.448380  | 5.648707  | -2.168189 |
| 60  | 6 | 0 | 1.064289  | -0.553264 | 0.842157  |
| 61  | 6 | 0 | 1.208820  | 0.358477  | 1.889269  |
| 62  | 6 | 0 | 1.346244  | 1.714050  | 1.588241  |
| 63  | 6 | 0 | 0.909542  | -2.027383 | 1.087336  |
| 64  | 6 | 0 | -2.919110 | -6.093947 | -0.711255 |
| 65  | 6 | 0 | -4.426093 | -5.957671 | -1.028912 |
| 66  | 6 | 0 | -4.717276 | -3.657497 | -1.797556 |
| 67  | 6 | 0 | -4.931445 | -2.209230 | -1.364634 |
| 68  | 6 | 0 | -4.979065 | -1.196150 | -2.520470 |
| 69  | 6 | 0 | -5.447155 | 0.026780  | -1.723200 |
| 70  | 6 | 0 | 4.610504  | 6.871110  | -2.421560 |
| 71  | 6 | 0 | -5.699428 | 2.405609  | -1.772621 |
| 72  | 6 | 0 | 3.894323  | 5.537790  | -2.688798 |
| 73  | 6 | 0 | -6.258361 | 1.113229  | -3.851814 |
| 74  | 6 | 0 | -6.580932 | -0.629637 | -0.905086 |
| 75  | 6 | 0 | 4.761871  | 3.242756  | -2.676747 |
| 76  | 6 | 0 | 5.690503  | 2.258960  | -1.957192 |
| 77  | 6 | 0 | -5.235651 | -6.904544 | -0.138380 |
| 78  | 6 | 0 | 7.151732  | 0.570777  | -2.357103 |
| 79  | 6 | 0 | 4.967804  | 1.011768  | -1.376603 |
| 80  | 6 | 0 | -2.476273 | -6.702957 | -3.078111 |
| 81  | 6 | 0 | -0.626137 | -6.645127 | -1.338365 |
| 82  | 6 | 0 | 0.194807  | -5.480420 | -1.925876 |
| 83  | 6 | 0 | -0.065572 | -8.015726 | -1.750357 |
| 84  | 6 | 0 | 1.421702  | -8.117222 | -1.381814 |
| 85  | 6 | 0 | 2.242468  | -6.981441 | -2.008380 |
| 86  | 6 | 0 | 1.690895  | -5.594850 | -1.588990 |
| 87  | 6 | 0 | 2.498900  | -4.473227 | -2.252148 |
| 88  | 6 | 0 | 5.977354  | -0.140446 | -1.654658 |
| 89  | 6 | 0 | 4.962237  | -0.955225 | -3.811889 |
| 90  | 6 | 0 | 4.766322  | -3.629807 | -2.692931 |
| 91  | 6 | 0 | 5.955401  | -4.495659 | -3.146325 |
| 92  | 6 | 0 | 5.297158  | -2.462078 | -1.849472 |
| 93  | 6 | 0 | 4.896809  | 3.922325  | 2.154424  |
| 94  | 7 | 0 | -0.483801 | -1.815482 | -4.188385 |
| 95  | 7 | 0 | -2.956799 | 5.533529  | 2.896725  |
| 96  | 7 | 0 | -4.561694 | 4.517350  | -2.124602 |
| 97  | 7 | 0 | 5.344960  | 3.084545  | 3.119002  |
| 98  | 7 | 0 | 1.427955  | 5.688998  | -3.063928 |
| 99  | 7 | 0 | 6.008642  | -2.784329 | 2.188533  |
| 100 | 7 | 0 | 4.609434  | 4.441605  | -2.050988 |
| 101 | 7 | 0 | 3.308763  | -4.253119 | 2.912172  |
| 102 | 7 | 0 | -2.767667 | -4.693013 | 3.088312  |
| 103 | 7 | 0 | -5.270276 | -2.338220 | 3.939830  |
| 104 | 7 | 0 | 5.403936  | -1.238446 | -2.437871 |
| 105 | 7 | 0 | -5.702851 | 3.521612  | 2.218186  |
| 106 | 7 | 0 | 3.815014  | -4.427402 | -1.930195 |
| 107 | 7 | 0 | 1.052933  | -0.175200 | -0.450712 |
| 108 | 7 | 0 | -2.060886 | -6.500523 | -1.683261 |
| 109 | 7 | 0 | 3.010796  | 5.510692  | 1.897704  |
| 110 | 7 | 0 | -4.812085 | -4.565859 | -0.803762 |
| 111 | 7 | 0 | -5.803251 | 1.232921  | -2.467567 |
| 112 | 8 | 0 | -5.521832 | 2.397377  | -0.547376 |



|     |   |   |           |           |           |
|-----|---|---|-----------|-----------|-----------|
| 113 | 8 | 0 | -6.225059 | -2.019691 | -0.778927 |
| 114 | 8 | 0 | -4.426954 | -3.921724 | -2.969722 |
| 115 | 8 | 0 | -2.540753 | -5.826701 | 0.438265  |
| 116 | 8 | 0 | 0.877962  | -2.309733 | 2.388823  |
| 117 | 8 | 0 | 1.998953  | -3.699823 | -3.092842 |
| 118 | 8 | 0 | 5.660211  | -2.690952 | -0.689737 |
| 119 | 8 | 0 | -5.465261 | 2.893882  | 4.398964  |
| 120 | 8 | 0 | 4.669546  | 1.098335  | 0.000954  |
| 121 | 8 | 0 | -5.001959 | -3.433813 | 1.952978  |
| 122 | 8 | 0 | 6.601953  | 1.756882  | -2.922918 |
| 123 | 8 | 0 | -1.376082 | -3.691508 | 4.605635  |
| 124 | 8 | 0 | 0.005293  | -5.865826 | 2.582860  |
| 125 | 8 | 0 | 4.236724  | 2.955517  | -3.749914 |
| 126 | 8 | 0 | 4.116690  | -5.183667 | 1.004839  |
| 127 | 8 | 0 | 2.280786  | 5.760471  | -0.942055 |
| 128 | 8 | 0 | 6.296404  | -2.154329 | 4.363673  |
| 129 | 8 | 0 | -3.544235 | 4.296116  | -4.157457 |
| 130 | 8 | 0 | 5.027186  | 3.690879  | 0.931746  |
| 131 | 8 | 0 | 1.727304  | 4.749927  | 3.630786  |
| 132 | 8 | 0 | -0.929796 | 4.499327  | 0.604883  |
| 133 | 8 | 0 | 0.323102  | 7.161281  | 2.525820  |
| 134 | 8 | 0 | -3.673281 | 5.140151  | 0.778352  |
| 135 | 8 | 0 | -3.849188 | -0.982381 | -3.386491 |
| 136 | 8 | 0 | 0.821595  | -2.856064 | 0.192478  |
| 137 | 8 | 0 | -2.170598 | -1.576167 | -1.980751 |
| 138 | 1 | 0 | 4.064297  | 5.299690  | 3.629176  |
| 139 | 1 | 0 | 0.856958  | 6.179558  | 0.792282  |
| 140 | 1 | 0 | -0.559164 | 4.285794  | 2.637599  |
| 141 | 1 | 0 | -2.000493 | 6.686358  | 1.467556  |
| 142 | 1 | 0 | -2.019288 | -1.688112 | -7.740932 |
| 143 | 1 | 0 | -3.437977 | -1.281106 | -5.715598 |
| 144 | 1 | 0 | -3.199727 | 6.187121  | 4.911270  |
| 145 | 1 | 0 | -3.825543 | 4.548022  | 4.557346  |
| 146 | 1 | 0 | -2.091259 | 4.818926  | 4.668387  |
| 147 | 1 | 0 | -0.679246 | 6.525672  | 4.238338  |
| 148 | 1 | 0 | -1.318715 | 7.980320  | 3.425971  |
| 149 | 1 | 0 | 1.304069  | -2.327700 | -5.067491 |
| 150 | 1 | 0 | 0.412139  | -2.233726 | -7.408139 |
| 151 | 1 | 0 | 4.872365  | 7.355323  | 2.505992  |
| 152 | 1 | 0 | 6.228112  | 6.234180  | 2.758606  |
| 153 | 1 | 0 | 5.505995  | 6.391168  | 1.148640  |
| 154 | 1 | 0 | 5.675550  | 4.113978  | 4.968782  |
| 155 | 1 | 0 | 5.279248  | 2.394444  | 5.090708  |
| 156 | 1 | 0 | 4.003166  | 3.545940  | 4.689524  |
| 157 | 1 | 0 | 6.345476  | 2.015825  | 1.675144  |
| 158 | 1 | 0 | 4.787176  | 0.423931  | 2.699787  |
| 159 | 1 | 0 | 5.661880  | 0.490745  | 4.241703  |
| 160 | 1 | 0 | 7.656330  | 2.255312  | 4.430009  |
| 161 | 1 | 0 | 8.021252  | 3.256617  | 3.021287  |
| 162 | 1 | 0 | 9.660844  | 1.362618  | 3.282019  |
| 163 | 1 | 0 | 8.791315  | 1.274492  | 1.755390  |
| 164 | 1 | 0 | 8.176063  | -0.358256 | 4.288448  |
| 165 | 1 | 0 | 8.877731  | -0.974394 | 2.797270  |
| 166 | 1 | 0 | 6.771289  | -0.481900 | 1.576450  |
| 167 | 1 | 0 | -7.167653 | 4.647224  | -1.145145 |
| 168 | 1 | 0 | -7.909289 | 3.933655  | -2.585580 |
| 169 | 1 | 0 | -7.032827 | 5.473709  | -2.715073 |
| 170 | 1 | 0 | 5.937214  | -4.338569 | 3.529068  |
| 171 | 1 | 0 | 6.612188  | -6.130927 | 1.879842  |

|     |   |   |           |           |           |
|-----|---|---|-----------|-----------|-----------|
| 172 | 1 | 0 | 7.803242  | -4.817286 | 2.019774  |
| 173 | 1 | 0 | 6.706300  | -4.890656 | 0.617195  |
| 174 | 1 | 0 | -5.616917 | 3.607617  | -3.594474 |
| 175 | 1 | 0 | 2.897868  | -2.681974 | 4.255959  |
| 176 | 1 | 0 | 3.042324  | -4.286140 | 5.009167  |
| 177 | 1 | 0 | 4.484754  | -3.400142 | 4.460755  |
| 178 | 1 | 0 | 2.009872  | -4.602961 | 1.360309  |
| 179 | 1 | 0 | 0.814426  | -3.514433 | 3.967075  |
| 180 | 1 | 0 | 1.837137  | -6.781969 | 2.383857  |
| 181 | 1 | 0 | 1.536771  | -6.080285 | 3.995685  |
| 182 | 1 | 0 | -2.401252 | 5.622470  | -1.396422 |
| 183 | 1 | 0 | -0.761847 | -4.286865 | 1.504913  |
| 184 | 1 | 0 | -2.798428 | 7.075700  | -4.054150 |
| 185 | 1 | 0 | -3.655763 | 7.410922  | -2.549978 |
| 186 | 1 | 0 | -1.782939 | 9.044312  | -2.913120 |
| 187 | 1 | 0 | -1.539045 | 8.102503  | -1.445885 |
| 188 | 1 | 0 | -3.634328 | -4.159851 | 4.848209  |
| 189 | 1 | 0 | -5.697119 | -5.563363 | 4.630598  |
| 190 | 1 | 0 | -5.190757 | -6.064565 | 3.010548  |
| 191 | 1 | 0 | -4.229814 | -6.547124 | 4.428958  |
| 192 | 1 | 0 | -0.210534 | 7.603192  | -4.163618 |
| 193 | 1 | 0 | 0.587925  | 8.220229  | -2.714481 |
| 194 | 1 | 0 | -0.816043 | 4.148962  | -2.595907 |
| 195 | 1 | 0 | -1.114881 | 5.031908  | -4.094140 |
| 196 | 1 | 0 | -5.569848 | -1.417970 | 5.793894  |
| 197 | 1 | 0 | -5.397699 | -3.166078 | 5.900579  |
| 198 | 1 | 0 | -3.966306 | -2.141997 | 5.613623  |
| 199 | 1 | 0 | -6.037687 | -1.510755 | 2.234090  |
| 200 | 1 | 0 | -4.432412 | 0.127342  | 3.141855  |
| 201 | 1 | 0 | -5.399886 | 0.357471  | 4.595023  |
| 202 | 1 | 0 | -7.620466 | -1.190735 | 4.833504  |
| 203 | 1 | 0 | -7.956902 | -2.322558 | 3.520931  |
| 204 | 1 | 0 | -9.407150 | -0.264105 | 3.398472  |
| 205 | 1 | 0 | -8.403652 | -0.444347 | 1.965783  |
| 206 | 1 | 0 | -7.830223 | 1.402564  | 4.355080  |
| 207 | 1 | 0 | -8.351202 | 1.917805  | 2.752031  |
| 208 | 1 | 0 | -6.233245 | 1.118813  | 1.762619  |
| 209 | 1 | 0 | 0.144630  | 6.105122  | -1.512934 |
| 210 | 1 | 0 | 0.685813  | 5.397310  | -4.996071 |
| 211 | 1 | 0 | 2.158979  | 6.371714  | -4.958362 |
| 212 | 1 | 0 | 2.233694  | 4.605409  | -4.694302 |
| 213 | 1 | 0 | -5.448656 | 5.053003  | 3.549210  |
| 214 | 1 | 0 | -6.069911 | 6.914801  | 2.010470  |
| 215 | 1 | 0 | -7.335773 | 5.670223  | 2.074012  |
| 216 | 1 | 0 | -6.237824 | 5.766652  | 0.673401  |
| 217 | 1 | 0 | 1.431290  | 3.150027  | -0.032687 |
| 218 | 1 | 0 | 1.173599  | 1.395394  | -1.783157 |
| 219 | 1 | 0 | 1.206445  | 0.005844  | 2.913016  |
| 220 | 1 | 0 | 1.454009  | 2.445066  | 2.384851  |
| 221 | 1 | 0 | -4.642019 | -6.172362 | -2.073206 |
| 222 | 1 | 0 | -4.146360 | -1.949209 | -0.644780 |
| 223 | 1 | 0 | -5.750671 | -1.541558 | -3.212711 |
| 224 | 1 | 0 | -4.645159 | 0.319315  | -1.041239 |
| 225 | 1 | 0 | 4.103429  | 7.692600  | -2.939531 |
| 226 | 1 | 0 | 5.642876  | 6.819740  | -2.779512 |
| 227 | 1 | 0 | 4.612575  | 7.101204  | -1.351261 |
| 228 | 1 | 0 | 3.923728  | 5.320007  | -3.753431 |
| 229 | 1 | 0 | -5.429768 | 0.881919  | -4.529295 |
| 230 | 1 | 0 | -7.009277 | 0.319221  | -3.923523 |

|     |   |   |           |           |           |
|-----|---|---|-----------|-----------|-----------|
| 231 | 1 | 0 | -6.735051 | 2.035549  | -4.178440 |
| 232 | 1 | 0 | -7.542185 | -0.558541 | -1.429998 |
| 233 | 1 | 0 | -6.685888 | -0.175908 | 0.082816  |
| 234 | 1 | 0 | 6.237811  | 2.761659  | -1.145290 |
| 235 | 1 | 0 | -6.305799 | -6.762686 | -0.315766 |
| 236 | 1 | 0 | -4.980545 | -7.946692 | -0.358644 |
| 237 | 1 | 0 | -5.020082 | -6.720286 | 0.916969  |
| 238 | 1 | 0 | 7.609339  | -0.009603 | -3.161715 |
| 239 | 1 | 0 | 7.930529  | 0.825710  | -1.621209 |
| 240 | 1 | 0 | 4.045683  | 0.828866  | -1.945242 |
| 241 | 1 | 0 | -1.587047 | -6.707346 | -3.709519 |
| 242 | 1 | 0 | -3.118496 | -5.885818 | -3.413568 |
| 243 | 1 | 0 | -2.989760 | -7.661968 | -3.217619 |
| 244 | 1 | 0 | -0.590321 | -6.575378 | -0.248497 |
| 245 | 1 | 0 | -0.208573 | -4.539549 | -1.538074 |
| 246 | 1 | 0 | 0.086441  | -5.446360 | -3.016634 |
| 247 | 1 | 0 | -0.172401 | -8.167330 | -2.833258 |
| 248 | 1 | 0 | -0.639061 | -8.810302 | -1.258133 |
| 249 | 1 | 0 | 1.820537  | -9.085843 | -1.705895 |
| 250 | 1 | 0 | 1.531719  | -8.083377 | -0.288622 |
| 251 | 1 | 0 | 2.210035  | -7.065483 | -3.104707 |
| 252 | 1 | 0 | 3.292941  | -7.073108 | -1.713686 |
| 253 | 1 | 0 | 1.833929  | -5.505841 | -0.505201 |
| 254 | 1 | 0 | 6.278714  | -0.576085 | -0.705561 |
| 255 | 1 | 0 | 5.540040  | -1.524723 | -4.548360 |
| 256 | 1 | 0 | 3.899435  | -1.181778 | -3.942296 |
| 257 | 1 | 0 | 5.108559  | 0.107299  | -4.013689 |
| 258 | 1 | 0 | 4.216267  | -3.274728 | -3.561342 |
| 259 | 1 | 0 | 5.598834  | -5.336955 | -3.747914 |
| 260 | 1 | 0 | 6.497624  | -4.885344 | -2.278953 |
| 261 | 1 | 0 | 6.657402  | -3.909038 | -3.749942 |
| 262 | 1 | 0 | -4.431503 | 4.732271  | -1.137671 |
| 263 | 1 | 0 | 6.012816  | -2.510504 | 1.208376  |
| 264 | 1 | 0 | 4.878315  | 4.526238  | -1.073822 |
| 265 | 1 | 0 | -2.848732 | -5.077905 | 2.145722  |
| 266 | 1 | 0 | -5.750255 | 3.209767  | 1.249148  |
| 267 | 1 | 0 | 4.134271  | -4.874003 | -1.070590 |
| 268 | 1 | 0 | 2.999928  | 5.786340  | 0.916655  |
| 269 | 1 | 0 | -4.917917 | -4.241795 | 0.160941  |
| 270 | 1 | 0 | 4.702916  | 2.035452  | 0.292626  |
| 271 | 1 | 0 | -1.902681 | 4.504347  | 0.497769  |

---

### Counter-clockwise alternating dimer

| Center Number | Atomic Number | Atomic Type | Coordinates (Angstroms) |           |           |
|---------------|---------------|-------------|-------------------------|-----------|-----------|
|               |               |             | X                       | Y         | Z         |
| 1             | 47            | 0           | 0.401803                | 0.752274  | 1.247958  |
| 2             | 6             | 0           | 5.743129                | -3.010519 | 2.560316  |
| 3             | 6             | 0           | 7.752657                | -1.564778 | 3.017026  |
| 4             | 6             | 0           | 5.409451                | -0.590945 | 3.144499  |
| 5             | 6             | 0           | 6.011837                | 0.823458  | 3.089755  |
| 6             | 6             | 0           | 7.420446                | 0.866189  | 3.704125  |
| 7             | 6             | 0           | 8.336335                | -0.144540 | 2.992686  |
| 8             | 6             | 0           | 4.665231                | 2.864323  | 2.905375  |
| 9             | 6             | 0           | 3.683901                | 3.885799  | 3.509438  |
| 10            | 6             | 0           | 1.341269                | 4.226080  | 2.863905  |
| 11            | 6             | 0           | 0.374650                | 4.563515  | 1.717652  |
| 12            | 6             | 0           | -0.950600               | 3.781834  | 1.825576  |
| 13            | 6             | 0           | -2.016638               | 4.887973  | 1.718805  |
| 14            | 6             | 0           | -1.277021               | 6.080692  | 2.342948  |
| 15            | 6             | 0           | -4.171368               | 3.837853  | 1.475655  |
| 16            | 6             | 0           | -5.688900               | 3.915334  | 1.698220  |
| 17            | 6             | 0           | -6.280779               | 1.816941  | 2.809319  |
| 18            | 6             | 0           | -7.005766               | 0.481061  | 2.675483  |
| 19            | 6             | 0           | -6.044774               | -0.702221 | 2.913098  |
| 20            | 6             | 0           | -6.810065               | -2.036876 | 2.831577  |
| 21            | 6             | 0           | -8.189228               | 0.441749  | 3.666013  |
| 22            | 6             | 0           | -7.981163               | -2.083409 | 3.828185  |
| 23            | 6             | 0           | -8.931882               | -0.899015 | 3.595073  |
| 24            | 6             | 0           | -5.598247               | -3.918980 | 1.863282  |
| 25            | 6             | 0           | -4.839845               | -5.255972 | 2.020337  |
| 26            | 6             | 0           | -2.415399               | -4.946225 | 2.162011  |
| 27            | 6             | 0           | -1.112331               | -4.793612 | 1.366278  |
| 28            | 6             | 0           | 0.104699                | -4.589587 | 2.272287  |
| 29            | 6             | 0           | 1.241848                | -4.877982 | 1.289884  |
| 30            | 6             | 0           | 0.652895                | -6.141569 | 0.620646  |
| 31            | 6             | 0           | 3.599224                | -5.044575 | 0.919619  |
| 32            | 6             | 0           | 5.071842                | -5.081517 | 1.384317  |
| 33            | 6             | 0           | 5.910537                | -5.964433 | 0.457106  |
| 34            | 6             | 0           | 4.662836                | 1.655334  | 5.065589  |
| 35            | 6             | 0           | 4.445566                | 5.162455  | 3.910116  |
| 36            | 6             | 0           | 2.777765                | -5.254120 | 3.286589  |
| 37            | 6             | 0           | -5.660915               | -6.384229 | 1.385199  |
| 38            | 6             | 0           | -5.407125               | -3.520383 | 4.318463  |
| 39            | 6             | 0           | -3.658773               | 4.892837  | 3.666691  |
| 40            | 6             | 0           | -6.281170               | 4.800056  | 0.586220  |
| 41            | 6             | 0           | 5.442475                | -0.935664 | -4.420780 |
| 42            | 6             | 0           | 5.537556                | 6.547114  | -0.812487 |
| 43            | 6             | 0           | 3.130144                | 6.335595  | -3.652960 |
| 44            | 6             | 0           | -5.178286               | 5.063418  | -5.455824 |
| 45            | 6             | 0           | -4.348093               | 1.325703  | -4.731879 |
| 46            | 6             | 0           | -5.447181               | -5.614369 | -2.707338 |
| 47            | 6             | 0           | -2.588564               | -4.210414 | -4.957256 |
| 48            | 6             | 0           | 6.276132                | -4.905761 | -3.769292 |
| 49            | 6             | 0           | -4.202976               | 4.217195  | -4.629572 |
| 50            | 6             | 0           | -4.998160               | 3.422746  | -3.567266 |
| 51            | 6             | 0           | -6.977764               | 0.381839  | -3.375406 |
| 52            | 6             | 0           | -5.933543               | 1.335513  | -2.757413 |
| 53            | 6             | 0           | -5.142296               | 0.436430  | -1.753226 |

|     |   |   |           |           |           |
|-----|---|---|-----------|-----------|-----------|
| 54  | 6 | 0 | -5.907881 | -0.903642 | -1.779066 |
| 55  | 6 | 0 | -5.196304 | -1.970130 | -2.620572 |
| 56  | 6 | 0 | -4.655908 | -4.318574 | -2.928004 |
| 57  | 6 | 0 | -3.176079 | -4.570918 | -2.574922 |
| 58  | 6 | 0 | 0.583036  | -7.163576 | -3.696435 |
| 59  | 6 | 0 | -0.766862 | -6.516133 | -4.027448 |
| 60  | 6 | 0 | -0.919874 | -5.166321 | -3.302261 |
| 61  | 6 | 0 | 0.242323  | -4.205971 | -3.627612 |
| 62  | 6 | 0 | 1.746975  | -6.224424 | -4.030738 |
| 63  | 6 | 0 | 1.605344  | -4.853491 | -3.317531 |
| 64  | 6 | 0 | 2.779186  | -3.973484 | -3.758835 |
| 65  | 6 | 0 | 5.244962  | -3.777023 | -3.641945 |
| 66  | 6 | 0 | 5.751340  | -2.706933 | -2.662185 |
| 67  | 6 | 0 | 7.347541  | 0.574861  | -2.519600 |
| 68  | 6 | 0 | 6.255577  | -0.417295 | -2.093648 |
| 69  | 6 | 0 | 5.158322  | 0.519581  | -1.565077 |
| 70  | 6 | 0 | 5.949402  | 1.761731  | -1.098008 |
| 71  | 6 | 0 | 5.458169  | 3.026818  | -1.813287 |
| 72  | 6 | 0 | 4.845501  | 5.379308  | -1.532890 |
| 73  | 6 | 0 | 3.322796  | 5.494843  | -1.331384 |
| 74  | 6 | 0 | -0.716868 | 7.929755  | -1.781901 |
| 75  | 6 | 0 | -2.119178 | 4.586004  | -3.374776 |
| 76  | 6 | 0 | -1.663029 | 7.047071  | -2.613893 |
| 77  | 6 | 0 | -1.253194 | 5.561905  | -2.562507 |
| 78  | 6 | 0 | 0.229226  | 5.384989  | -2.961737 |
| 79  | 6 | 0 | 1.134239  | 6.263140  | -2.081606 |
| 80  | 6 | 0 | 0.751802  | 7.747223  | -2.193574 |
| 81  | 6 | 0 | -0.067484 | -2.153144 | 2.577366  |
| 82  | 6 | 0 | 3.169448  | -0.088736 | -0.213047 |
| 83  | 6 | 0 | 1.310257  | -0.146948 | -3.541241 |
| 84  | 6 | 0 | 2.287193  | -0.426951 | -2.581694 |
| 85  | 6 | 0 | 0.306888  | 0.766311  | -3.228543 |
| 86  | 6 | 0 | 2.192422  | 0.179785  | -1.330502 |
| 87  | 6 | 0 | 0.264120  | 1.297677  | -1.936033 |
| 88  | 6 | 0 | -0.710403 | -0.748570 | 6.036800  |
| 89  | 6 | 0 | -0.586453 | -1.664162 | 4.992188  |
| 90  | 6 | 0 | -0.427095 | 0.590773  | 5.787901  |
| 91  | 6 | 0 | 6.326626  | -1.603495 | 2.423229  |
| 92  | 6 | 0 | -0.057340 | 0.976883  | 4.496946  |
| 93  | 6 | 0 | -0.203829 | -1.196297 | 3.732660  |
| 94  | 7 | 0 | -6.312090 | 2.605461  | 1.693252  |
| 95  | 7 | 0 | 0.036538  | 0.104973  | 3.480199  |
| 96  | 7 | 0 | -5.915454 | -3.205933 | 2.977481  |
| 97  | 7 | 0 | -3.518474 | -5.140997 | 1.409138  |
| 98  | 7 | 0 | 2.646991  | 4.164093  | 2.520523  |
| 99  | 7 | 0 | 5.099829  | 1.835832  | 3.677831  |
| 100 | 7 | 0 | 1.164444  | 0.985764  | -0.993126 |
| 101 | 7 | 0 | 2.591909  | -5.034149 | 1.845108  |
| 102 | 7 | 0 | 5.583375  | -3.711163 | 1.402236  |
| 103 | 7 | 0 | 2.570038  | 6.024707  | -2.332474 |
| 104 | 7 | 0 | 5.307981  | 4.105794  | -1.008373 |
| 105 | 7 | 0 | 5.801771  | -1.398750 | -3.070873 |
| 106 | 7 | 0 | 3.964490  | -4.284172 | -3.155704 |
| 107 | 7 | 0 | -2.253428 | -4.582296 | -3.576993 |
| 108 | 7 | 0 | -5.194002 | -3.227232 | -2.125356 |
| 109 | 7 | 0 | -5.119688 | 2.072498  | -3.725974 |
| 110 | 7 | 0 | -3.238598 | 5.087612  | -3.962033 |
| 111 | 7 | 0 | -3.343655 | 4.571913  | 2.265974  |
| 112 | 8 | 0 | -2.881808 | -4.814607 | -1.396316 |

|     |   |   |           |           |           |
|-----|---|---|-----------|-----------|-----------|
| 113 | 8 | 0 | 2.686635  | -3.126956 | -4.654920 |
| 114 | 8 | 0 | -5.185475 | 0.939170  | -0.422129 |
| 115 | 8 | 0 | -5.526239 | 4.056316  | -2.650288 |
| 116 | 8 | 0 | -1.794582 | 3.400493  | -3.496437 |
| 117 | 8 | 0 | -7.176850 | -0.624837 | -2.385464 |
| 118 | 8 | 0 | 2.842421  | 5.148039  | -0.242825 |
| 119 | 8 | 0 | 5.272539  | 3.031859  | -3.033872 |
| 120 | 8 | 0 | 4.490236  | -0.125695 | -0.453893 |
| 121 | 8 | 0 | 6.076899  | -3.055472 | -1.522445 |
| 122 | 8 | 0 | 7.319729  | 1.533531  | -1.465055 |
| 123 | 8 | 0 | 0.172055  | -3.379292 | 3.047190  |
| 124 | 8 | 0 | -1.044096 | 2.800728  | 0.793832  |
| 125 | 8 | 0 | 0.918150  | 4.028147  | 4.011780  |
| 126 | 8 | 0 | 5.044439  | 3.038767  | 1.736662  |
| 127 | 8 | 0 | -0.169893 | -1.841914 | 1.404346  |
| 128 | 8 | 0 | 2.778023  | -0.312518 | 0.918291  |
| 129 | 8 | 0 | -3.728605 | 3.211797  | 0.488500  |
| 130 | 8 | 0 | -5.763086 | 2.188465  | 3.864737  |
| 131 | 8 | 0 | -5.928691 | -3.553060 | 0.724231  |
| 132 | 8 | 0 | -2.414328 | -4.857378 | 3.395510  |
| 133 | 8 | 0 | 3.342724  | -4.975003 | -0.291484 |
| 134 | 8 | 0 | 5.461368  | -3.476680 | 3.667556  |
| 135 | 8 | 0 | -0.780119 | -6.006040 | 0.678230  |
| 136 | 8 | 0 | 0.031120  | 5.965780  | 1.791314  |
| 137 | 8 | 0 | -4.718090 | -1.689742 | -3.730422 |
| 138 | 1 | 0 | 7.704358  | -1.936446 | 4.048611  |
| 139 | 1 | 0 | 8.406632  | -2.249749 | 2.463097  |
| 140 | 1 | 0 | 4.422989  | -0.582468 | 2.670853  |
| 141 | 1 | 0 | 5.286182  | -0.930903 | 4.179725  |
| 142 | 1 | 0 | 6.098546  | 1.111798  | 2.042028  |
| 143 | 1 | 0 | 7.377749  | 0.623656  | 4.775474  |
| 144 | 1 | 0 | 7.829754  | 1.879986  | 3.618898  |
| 145 | 1 | 0 | 9.328300  | -0.140316 | 3.459866  |
| 146 | 1 | 0 | 8.481289  | 0.174713  | 1.950472  |
| 147 | 1 | 0 | 3.158264  | 3.490143  | 4.377344  |
| 148 | 1 | 0 | 0.846008  | 4.398748  | 0.748170  |
| 149 | 1 | 0 | -1.033435 | 3.308317  | 2.810405  |
| 150 | 1 | 0 | -2.159312 | 5.100177  | 0.654378  |
| 151 | 1 | 0 | -1.682917 | 7.051430  | 2.046354  |
| 152 | 1 | 0 | -1.241763 | 6.026292  | 3.438168  |
| 153 | 1 | 0 | -5.909480 | 4.363270  | 2.665857  |
| 154 | 1 | 0 | -7.402817 | 0.395603  | 1.655376  |
| 155 | 1 | 0 | -5.572175 | -0.578586 | 3.895990  |
| 156 | 1 | 0 | -5.252227 | -0.690904 | 2.155815  |
| 157 | 1 | 0 | -7.218912 | -2.124887 | 1.822336  |
| 158 | 1 | 0 | -8.879060 | 1.267607  | 3.452451  |
| 159 | 1 | 0 | -7.798394 | 0.608028  | 4.677839  |
| 160 | 1 | 0 | -8.518702 | -3.033457 | 3.719411  |
| 161 | 1 | 0 | -7.607964 | -2.040765 | 4.860202  |
| 162 | 1 | 0 | -9.408730 | -1.003037 | 2.610185  |
| 163 | 1 | 0 | -9.739684 | -0.919786 | 4.336260  |
| 164 | 1 | 0 | -4.664969 | -5.496905 | 3.066335  |
| 165 | 1 | 0 | -1.226242 | -3.973866 | 0.646653  |
| 166 | 1 | 0 | 0.053057  | -5.352704 | 3.050205  |
| 167 | 1 | 0 | 1.289713  | -4.072300 | 0.553371  |
| 168 | 1 | 0 | 0.971667  | -6.242718 | -0.418221 |
| 169 | 1 | 0 | 0.951375  | -7.043934 | 1.170493  |
| 170 | 1 | 0 | 5.157733  | -5.449907 | 2.404668  |
| 171 | 1 | 0 | 5.924955  | -5.552589 | -0.553530 |

|     |   |   |           |           |           |
|-----|---|---|-----------|-----------|-----------|
| 172 | 1 | 0 | 5.504731  | -6.980984 | 0.417145  |
| 173 | 1 | 0 | 6.937367  | -6.014127 | 0.831473  |
| 174 | 1 | 0 | 3.629149  | 1.295669  | 5.128937  |
| 175 | 1 | 0 | 4.755421  | 2.581687  | 5.638315  |
| 176 | 1 | 0 | 5.306725  | 0.914888  | 5.540043  |
| 177 | 1 | 0 | 5.200439  | 4.947166  | 4.675338  |
| 178 | 1 | 0 | 4.954505  | 5.588998  | 3.039953  |
| 179 | 1 | 0 | 3.745662  | 5.901557  | 4.310187  |
| 180 | 1 | 0 | 3.751379  | -4.883869 | 3.606532  |
| 181 | 1 | 0 | 2.034343  | -4.677994 | 3.837707  |
| 182 | 1 | 0 | 2.669450  | -6.313968 | 3.551651  |
| 183 | 1 | 0 | -5.103835 | -7.324381 | 1.434799  |
| 184 | 1 | 0 | -5.896031 | -6.157783 | 0.342972  |
| 185 | 1 | 0 | -6.607654 | -6.511679 | 1.921621  |
| 186 | 1 | 0 | -5.365283 | -2.595659 | 4.898220  |
| 187 | 1 | 0 | -4.394517 | -3.923402 | 4.268039  |
| 188 | 1 | 0 | -6.057710 | -4.224445 | 4.852071  |
| 189 | 1 | 0 | -3.963011 | 5.938414  | 3.792625  |
| 190 | 1 | 0 | -4.439466 | 4.222102  | 4.026904  |
| 191 | 1 | 0 | -2.771523 | 4.710682  | 4.279274  |
| 192 | 1 | 0 | -7.364182 | 4.872658  | 0.725151  |
| 193 | 1 | 0 | -6.068940 | 4.396975  | -0.408413 |
| 194 | 1 | 0 | -5.860791 | 5.810310  | 0.641148  |
| 195 | 1 | 0 | 6.255697  | -1.106543 | -5.136230 |
| 196 | 1 | 0 | 4.536590  | -1.430170 | -4.776770 |
| 197 | 1 | 0 | 5.248928  | 0.138829  | -4.383293 |
| 198 | 1 | 0 | 6.622574  | 6.465994  | -0.924363 |
| 199 | 1 | 0 | 5.214352  | 7.507949  | -1.227872 |
| 200 | 1 | 0 | 5.289327  | 6.539726  | 0.254171  |
| 201 | 1 | 0 | 3.868403  | 7.143859  | -3.606379 |
| 202 | 1 | 0 | 2.322650  | 6.664882  | -4.306903 |
| 203 | 1 | 0 | 3.591530  | 5.451804  | -4.104035 |
| 204 | 1 | 0 | -5.869825 | 4.418852  | -6.007705 |
| 205 | 1 | 0 | -5.772651 | 5.706851  | -4.798490 |
| 206 | 1 | 0 | -4.634896 | 5.682919  | -6.176447 |
| 207 | 1 | 0 | -4.718581 | 1.513649  | -5.746983 |
| 208 | 1 | 0 | -4.438590 | 0.259282  | -4.523989 |
| 209 | 1 | 0 | -3.291376 | 1.599627  | -4.673748 |
| 210 | 1 | 0 | -5.086822 | -6.399649 | -3.381101 |
| 211 | 1 | 0 | -5.331445 | -5.972767 | -1.681804 |
| 212 | 1 | 0 | -6.508772 | -5.444251 | -2.909853 |
| 213 | 1 | 0 | -1.662407 | -4.062813 | -5.513601 |
| 214 | 1 | 0 | -3.168090 | -4.986756 | -5.472311 |
| 215 | 1 | 0 | -3.143379 | -3.269813 | -4.971132 |
| 216 | 1 | 0 | 7.219898  | -4.521267 | -4.172318 |
| 217 | 1 | 0 | 6.485530  | -5.358811 | -2.796840 |
| 218 | 1 | 0 | 5.897472  | -5.675447 | -4.448229 |
| 219 | 1 | 0 | -3.633049 | 3.564485  | -5.287541 |
| 220 | 1 | 0 | -7.943317 | 0.866399  | -3.544295 |
| 221 | 1 | 0 | -6.630538 | -0.056316 | -4.318504 |
| 222 | 1 | 0 | -6.445959 | 2.090463  | -2.162605 |
| 223 | 1 | 0 | -4.102623 | 0.311850  | -2.077160 |
| 224 | 1 | 0 | -6.099905 | -1.266114 | -0.766497 |
| 225 | 1 | 0 | -4.769692 | -4.007099 | -3.963227 |
| 226 | 1 | 0 | 0.612094  | -7.420168 | -2.627872 |
| 227 | 1 | 0 | 0.693824  | -8.106012 | -4.246231 |
| 228 | 1 | 0 | -1.591329 | -7.178079 | -3.736326 |
| 229 | 1 | 0 | -0.839662 | -6.369613 | -5.114482 |
| 230 | 1 | 0 | -0.921359 | -5.355123 | -2.226065 |

|     |   |   |           |           |           |
|-----|---|---|-----------|-----------|-----------|
| 231 | 1 | 0 | 0.241088  | -3.922330 | -4.686162 |
| 232 | 1 | 0 | 0.122246  | -3.279552 | -3.052978 |
| 233 | 1 | 0 | 2.701187  | -6.686015 | -3.754256 |
| 234 | 1 | 0 | 1.779083  | -6.052507 | -5.116139 |
| 235 | 1 | 0 | 1.698947  | -5.020635 | -2.236614 |
| 236 | 1 | 0 | 5.044580  | -3.363520 | -4.627667 |
| 237 | 1 | 0 | 8.344268  | 0.127331  | -2.539584 |
| 238 | 1 | 0 | 7.141931  | 1.048497  | -3.487705 |
| 239 | 1 | 0 | 6.630460  | -0.985956 | -1.242792 |
| 240 | 1 | 0 | 4.438937  | 0.788974  | -2.336700 |
| 241 | 1 | 0 | 5.905810  | 1.876541  | -0.014582 |
| 242 | 1 | 0 | 5.113198  | 5.381779  | -2.587950 |
| 243 | 1 | 0 | -0.817612 | 7.671414  | -0.718216 |
| 244 | 1 | 0 | -1.009874 | 8.981336  | -1.881098 |
| 245 | 1 | 0 | -2.686881 | 7.178303  | -2.237622 |
| 246 | 1 | 0 | -1.655828 | 7.391620  | -3.657800 |
| 247 | 1 | 0 | -1.349714 | 5.213632  | -1.522482 |
| 248 | 1 | 0 | 0.344950  | 5.652308  | -4.021803 |
| 249 | 1 | 0 | 0.508188  | 4.332645  | -2.863745 |
| 250 | 1 | 0 | 0.988040  | 5.967326  | -1.041338 |
| 251 | 1 | 0 | 1.403883  | 8.346721  | -1.547828 |
| 252 | 1 | 0 | 0.893422  | 8.107415  | -3.222406 |
| 253 | 1 | 0 | 1.353868  | -0.644255 | -4.505090 |
| 254 | 1 | 0 | 3.084523  | -1.126719 | -2.798983 |
| 255 | 1 | 0 | -0.448702 | 1.067767  | -3.945183 |
| 256 | 1 | 0 | -0.514198 | 1.996415  | -1.649427 |
| 257 | 1 | 0 | -1.016305 | -1.080650 | 7.024381  |
| 258 | 1 | 0 | -0.796979 | -2.717894 | 5.127700  |
| 259 | 1 | 0 | -0.492366 | 1.339987  | 6.570117  |
| 260 | 1 | 0 | 6.375834  | -1.333030 | 1.360182  |
| 261 | 1 | 0 | 0.182894  | 2.014388  | 4.282468  |
| 262 | 1 | 0 | -6.446639 | 2.145739  | 0.797211  |
| 263 | 1 | 0 | -3.439521 | -5.094071 | 0.389417  |
| 264 | 1 | 0 | 2.930876  | 4.400817  | 1.568257  |
| 265 | 1 | 0 | 5.783146  | -3.284042 | 0.500646  |
| 266 | 1 | 0 | 5.272486  | 3.956901  | -0.000962 |
| 267 | 1 | 0 | 3.947701  | -4.762585 | -2.255493 |
| 268 | 1 | 0 | -5.483102 | -3.409841 | -1.162865 |
| 269 | 1 | 0 | -3.581913 | 5.987338  | -3.657560 |
| 270 | 1 | 0 | -4.625371 | 1.739653  | -0.346397 |
| 271 | 1 | 0 | -2.004509 | 2.727344  | 0.576385  |

---
